# Supplementary material for: Revisiting the evolution of mouse LINE-1 in the genomic era
Source: PubMed Central journal article supplement (PMC3600994; doi:10.1186/1759-8753-4-3), 2013-01-03

Alignment of parsimony informative sites showing the recombinant origin of the Tf families. The arrow indicates the position of the recombination breakpoint.

|            |            |            |            |            |                 |
|------------|------------|------------|------------|------------|-----------------|
|            | 1111111111 | 1111111111 | 1222222222 | 2222222222 | 2222            |
|            | 7777778888 | 9999999999 | 9000000111 | 1111222222 | 2223            |
|            | 3345791377 | 0011235677 | 8011249034 | 4789000033 | 4551            |
|            | 5600850769 | 0669927978 | 4212915411 | 3366038913 | 2187            |
| L1MdTf_I   | ACTACGTCTT | CATGGTTTCA | GACAAC     | AAGC       | TGATGAGGTC TTAT |
| L1MdTf_II  | .....T..   | .....      | .....      | .....      | .....           |
| L1MdTf_III | .....T..   | ..A.....   | .....G.    | .....      | .....CC.G.....  |
| L1MdF_II   | ....GK.T.. | ..A..WC... | ..T.G.     | G.AT       | AACCAGTACT C.MC |
| L1MdF_I    | ....G.CT.. | .TAATACYG. | ..T.G.     | GGAT       | AACCAGTACT C.G. |
| L1MdF_III  | ....GT.T.. | .TAATAC.G. | ..T.G.     | GGAT       | AACCAGTACT C.CY |
| L1MdA_I    | TTAGGTCTCG | TTA..A.CGC | ACTGGT     | .....      | A.CC.G.....C..  |
| L1MdA_II   | TTDGGTCTCG | TTA..A.CGC | ACTGGT     | .....      | A.CC.G.....C..  |
| L1MdA_III  | .T.GGTCTCG | TTA..A.CGC | ACTGG.     | .....      | ..CC.G.....     |

↑

Alignment of parsimony informative sites showing the recombinant origin of the Gf\_I family. The arrow indicates the position of the recombination breakpoint.

|           |            |            |            |            |            |                  |
|-----------|------------|------------|------------|------------|------------|------------------|
|           | ORFI       |            |            | ORFII      |            |                  |
|           | 111        | 1111111111 | 1111111111 | 1111111111 | 1111111111 | 11111            |
|           | 7999999001 | 1111111222 | 222222333  | 334444455  | 555555666  | 66667            |
|           | 9014469351 | 2237789001 | 1223378336 | 8912348811 | 1222469023 | 35683            |
|           | 7182468793 | 2510381474 | 5454617397 | 4643283401 | 9058675970 | 79355            |
| L1MdA_I   | TTGAGCGGGC | AATGGATCCA | GATCACA    | ATG        | GCCGCGACTT | GGACTACCCA GGCTT |
| L1MdA_II  | .....      | .....      | .....      | .....      | .....      | .....            |
| L1MdA_III | .....      | .....G.    | .CC.....   | .....T..C  | .....T     | .A.CA            |
| L1MdA_IV  | ...C.....  | .T.AA..AG. | .CC.....   | .....T..C  | .A.....TC  | .A.CA            |
| L1MdGf_I  | ACACAT..AT | CTCAGCAAG  | ACM.TTC    | .....T..C  | .....T     | .A.CA            |
| L1MdGf_II | ACACAT.TAT | CTCAGCAAG  | ACCATTCTC  | .....T...  | .....T     | .A.CA            |
| L1MdF_I   | ACACAT.TAT | CTCAGCAAG  | ACCATTCTCA | ATTATATAYC | T.GTHG..TT | AAACA            |
| L1MdF_II  | ACACAT.TA. | .TCAGCAAG  | .CC.TTCTCA | ATTATATACC | T.GTCG.MTT | AAACA            |
| L1MdF_III | ACACAT.TA. | .T.AC.CAGG | .CC.TTY.C. | .TTATATA.C | TA..CG.ATT | AAACA            |

↑

Alignment of parsimony informative sites showing the recombinant origin of the Gf\_II family. The arrow indicates the position of the recombination breakpoint.

|           |            |            |            |            |            |                  |
|-----------|------------|------------|------------|------------|------------|------------------|
|           | ORFI       |            |            | ORFII      |            |                  |
|           | 111        | 1111111111 | 1111111111 | 1111111111 | 1111111111 | 11111            |
|           | 7999999001 | 1111111222 | 222222333  | 334444455  | 555555666  | 66667            |
|           | 9014469351 | 2237789001 | 1223378336 | 8912348811 | 1222469023 | 35683            |
|           | 7182468793 | 2510381474 | 5454617397 | 4643283401 | 9058675970 | 79355            |
| L1MdA_I   | TTGAGCGGGC | AATGGATCCA | GATCACA    | ATG        | GCCGCGACTT | GGACTACCCA GGCTT |
| L1MdA_II  | .....      | .....      | .....      | .....      | .....      | .....            |
| L1MdA_III | .....      | .....G.    | .CC.....   | .....T..C  | .....T     | .A.CA            |
| L1MdA_IV  | ...C.....  | .T.AA..AG. | .CC.....   | .....T..C  | .A.....TC  | .A.CA            |
| L1MdGf_I  | ACACAT..AT | CTCAGCAAG  | ACM.TTC    | .....T..C  | .....T     | .A.CA            |
| L1MdGf_II | ACACAT.TAT | CTCAGCAAG  | ACCATTCTC  | .....T...  | .....T     | .A.CA            |
| L1MdF_I   | ACACAT.TAT | CTCAGCAAG  | ACCATTCTCA | ATTATATAYC | T.GTHG..TT | AAACA            |
| L1MdF_II  | ACACAT.TA. | .TCAGCAAG  | .CC.TTCTCA | ATTATATACC | T.GTCG.MTT | AAACA            |
| L1MdF_III | ACACAT.TA. | .T.AC.CAGG | .CC.TTY.C. | .TTATATA.C | TA..CG.ATT | AAACA            |

↑

Alignment of parsimony informative sites showing recombination between recent L1 families at the 3' end of ORF2 and in the 3'UTR. The arrows indicate the position of the recombination breakpoints.

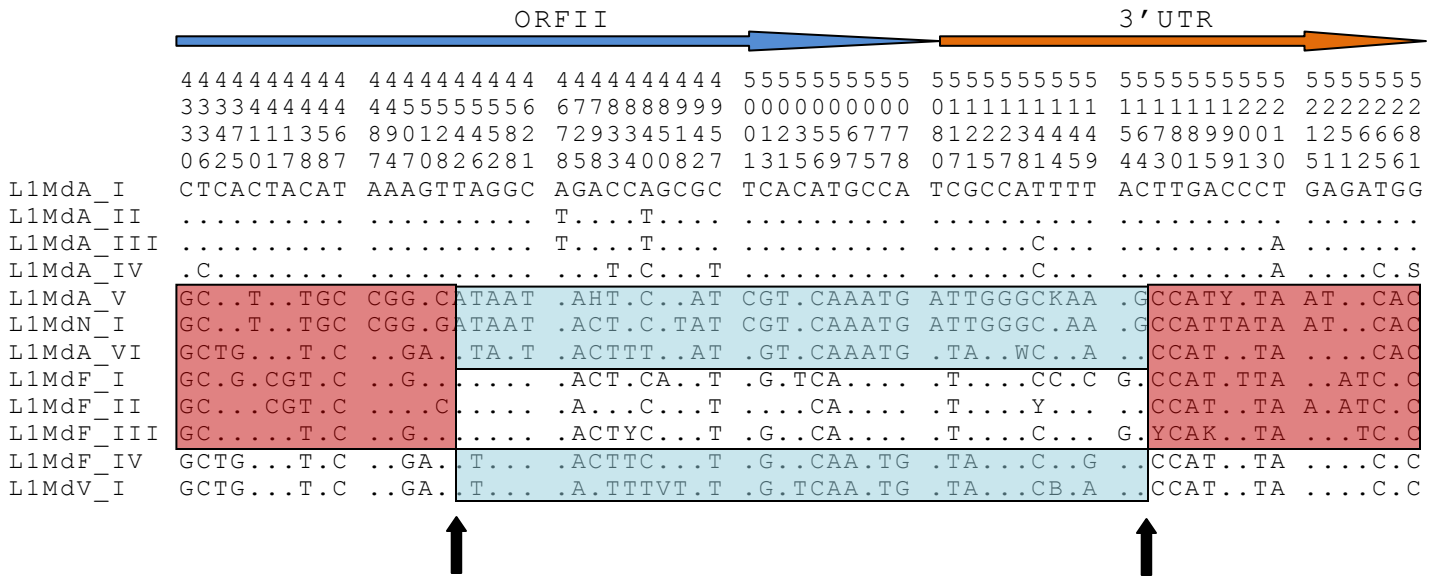

Alignment of parsimony informative sites showing the transfer of an ancestral coiled-coil domain (framed in blue) to the L1Mda\_VI, L1Mda\_VII, L1MdGf\_II and L1Mdf\_III families. The arrows indicate the position of the recombination breakpoints.

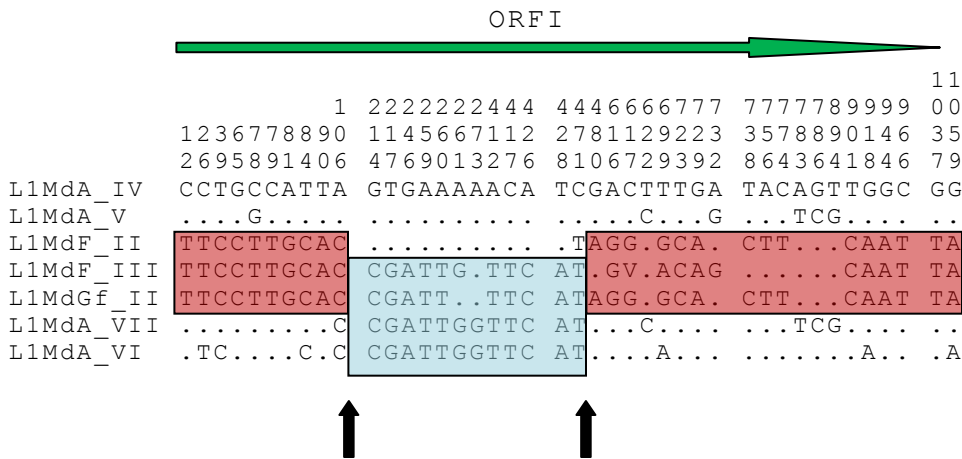

Supplement: 1759-8753-4-3-S3.pdf [file 1759-8753-4-3-S3.pdf]
