# Supplementary material for: Revisiting the evolution of mouse LINE-1 in the genomic era
Source: PubMed Central journal article supplement (PMC3600994; doi:10.1186/1759-8753-4-3), 2013-01-03
Supplement: 1759-8753-4-3-S1.pdf [file 1759-8753-4-3-S1.pdf]

```

#L1MdA_I      ATGGCGAAAG  GCAAACGTAA  GAATCCTACT  AACAGAAATC  AAGACCACTC  ACCATCATCA  GAACGCAGCA  CTCCCACCCC [ 80]
#L1MdA_II     . . . . .
#L1MdA_III    . . . . .
#L1MdA_IV     . . . . .
#L1MdGf_I     . . . . .T. . . . .GC. .G. . . . .C. .A. .G. . . .TT. [ 80]
#L1MdGf_II    . . . . .T. . . . .T. . . . .C. .G. .T. . . . .C. . . . .TT. [ 80]
#L1MdTf_I     . . . . .T. . . .G.G. .T. . . .G. .C. . . . .C. . . . .A. . . .TT. [ 80]
#L1MdTf_II    . . . . .T. . . .G.G. .T. . . .G. .C. . . . .C. . . . .A. . . .TT. [ 80]
#L1MdTf_III   . . . . .T. . . .G. . . . .G. .C. . . . .C. . . . .TT. [ 80]
#L1MdA_V      . . . . .A. . . . . . . . . .G. . . . . . . . . .G. . [ 80]
#L1MdA_VI     . . . . .A. . . . .T. . . . .C. . . . . . . . . . . [ 80]
#L1MdF_V      . . . . . . . . . .T. . . . .C. . . . . . . . . .T. [ 80]
#L1MdF_IV     . . . . . . . . . .T. . . . .C. . . . . . . . . .T. [ 80]
#L1MdF_I      . . . . .T. . . . . . . . . .C. .G. . . . .C. .A. .G. . . .TT. [ 80]
#L1MdF_II     . . . . .T. . . . .G. . . . .T. . . . .G. .C. . . . .C. . . . .TT. [ 80]
#L1MdF_III    . . . . .Y. . . . .T. . . . .T. . . . .C. . . . .C. . . . .TT. [ 80]
#L1MdN_I      . . . . . . . . . . . . . . . . . . . . . . . .G. . [ 80]
#L1MdA_VII    . . . . . . . . . . . . . . . . . . . . . . . . . [ 80]
#L1MdMus_I    . . . . . . . . . .T. . . . .C. . . . .A. .G GG. . . .C. .T. .G. . . .A. [ 80]
#L1MdFanc_I   . . . . . . . . . .T. . . . .C. . . . . . . . . . . . . .T. [ 80]
#L1MdV_I      . . . . .AGG. . . .G. . . . .CAGA.GC . . . .C. . .GTT. .T GG. . . .CA.A.T . . . .AT [ 80]
#L1MdFanc_II  . . . . . . . . . .T. . . . .C. . . . . . . . . .G. . . .C. .T. .D. . . .A. [ 80]
#L1MdMus_II   . . . . .R. . . . .W. . . . .T. . . . .C. . . . .GG. . . . .C. .T. .G. .Y. .A. [ 80]
#L1MdV_II     . . . . .AGG. . . .G.A. . . .CAGA.GC . . . .C. . .GTT. .T GG. . . .CA.A.T . . . .AT [ 80]
#L1Lx_I       . . . . .D. . . . .Y. . . . .T. . . . .C. . . . .HY. .T GG. . . .C. .T. . . .A. [ 80]
#L1Lx_III     . . . . .G.AC. . . .G.AC. . .CATA.GC . . . .C. .C.V.T. .T GG. . . .H. .TT . . . .A. [ 80]
#L1Lx_II      . . . . .G. .C. . . .CYT. .C . . . .C. . .GHT. WT GG.G. . . .VC. .TT .N. . . .MAN [ 80]
#L1Lx_IV      . . . . .R. . . . .GG.C. . . .CATA.GC . . . .C. . .GNT. .T GG. . . .C. .TT . . . .G.A. [ 80]
#L1MdV_III    . . . . .T.GG. . . .G.A. . . .CATA.GC . . . .C. . .GTT. .T GG. . . .C. .ATT . . . .AT [ 80]

```

```

#L1MdA_I      ACCTAGTCTC  GGGCACCCCA  ACACAACCGA  AAATCTAGAC  CCAGATTTAA  AAACATTTC  CATGATGATG  ATAGAGGACA [ 160]
#L1MdA_II     . . . . .
#L1MdA_III    . . . . .
#L1MdA_IV     . . . . .
#L1MdGf_I     G. .C.A. .A . .A. . . .T. . . .C.T. . .GG. . .TG. . . .G. .A. . . .G. . . . [ 160]
#L1MdGf_II    G. .C.A. .A . . . . .Y. . . .C.T. . .G. . .TG. . . .G. .A. . . .G. . . . [ 160]
#L1MdTf_I     G. .C. .A .A . . . . .C.T. .G. .C. . .T. . . .G. .A. . . .G. . . . [ 160]
#L1MdTf_II    G. .C. .A .A . . . . .C.T. .G. .C. . .T. . . .G. .A. . . .G. . . . [ 160]
#L1MdTf_III   G. .C. .A . . . . . . . . .C. . .C. . .T. . . .G. .A. . . .G. . . . [ 160]
#L1MdA_V      . . . . . . . . . . . . . . .G. . . .G. . . .G. . . .G. . . . [ 160]
#L1MdA_VI     . . . . . . . . . .C. . . .GA. .T. .G. . . .G. .A. . . .G. . . . [ 160]
#L1MdF_V      G. .C. . . . . . . .C.YR. . .G. . .G. . .G. .A. . . .G. . . . [ 160]
#L1MdF_IV     .G. .C. . . . .Y. . . .C. . .G. . .GG. . . .G. .A. . . .G. . . . [ 160]
#L1MdF_I      G. .C. .A . . . . .T. . . .C.T. . .GG. . .TG. . . .G. .A. . . .G. . . . [ 160]
#L1MdF_II     G. .C. .A . . . . . . . .C. . .C. . . .G. .A. . . .G. . . . [ 160]
#L1MdF_III    G. .C. .A . . . . . . . .C. . .G. . . .G. .A. . . .G. . . . [ 160]
#L1MdN_I      . . . . . . . . . . . . . .G. . . .G. . . .G. .A. . . .G. . . . [ 160]
#L1MdA_VII    . . . . . . . . . .C. . . .G.W. . .G. . .G. .A. . . .G. . . . [ 160]
#L1MdMus_I    .A.G. . . . .AT. . . . .C. . . .G.A. .G.G. . . .T. .A. . . .G. . . .A. .TT [ 160]
#L1MdFanc_I   .G.C. . . . .AT. . . . .C. . . .G.A. .T.G. . . .T. .A. . . .C. . . .G. . . . [ 160]
#L1MdV_I      .G.A. . . . .AT. .A. .T. . .C.A. . .G.A. .ATG. .C. .GT. .C. . . .G. . . .T [ 160]
#L1MdFanc_II  .G.G. . . . .AT. . . . .C. .A. .G.A. .T.G. . . .T. .A. . . .C. . . .TT [ 160]
#L1MdMus_II   .G.G. . . . .AT. . . . .C. .A. .G.A. .Y.T.G. . . .T. .A. . . .C. . . .TT [ 160]
#L1MdV_II     .G.A. . . . .AT. .A. .T. . .C.A. . .G.A. .ATG. .C. .GT. .C. . . .G. . . .T [ 160]
#L1Lx_I       .G.G. . . . .AT.H. . . .C.G. . .G.A.V.T.T.G. . . .T. .A. . . .C. . . .TT [ 160]
#L1Lx_III     .G.G.AC. . .TT. . . . .C.A. . .G.A. .T.T. . . .T. .CA. . . . .VT [ 160]
#L1Lx_II      .G.A.D. . . .AT.H. . . .N. .C.G. . .G.A. .T.T.G. . . .T. .YA. .H. . . .V. . . .YT [ 160]
#L1Lx_IV      .GTG. .C. . .NT. . . . .C.A. . .G.A. .T.T. . . .T. .CA. . . . .T [ 160]
#L1MdV_III    .G.A. . . . .AT. .A. .T. . .C.G. . .GBA. .Y.T.G. . .C. .RT. .C. . . .C. . . .V. . . .T [ 160]

```

```

#L1MdA_I      TCAAGAAGGA  CTTTCATAAG  TCACTTAAAG  ATTTACAGGA  GAGCACTGCT  AAAGAGTTA-  -----  ----- [ 240]
#L1MdA_II     . . . . .
#L1MdA_III    . . . . .
#L1MdA_IV     . . . . .C. . . . .AA. . . . . . . . . . . . . . . [ 240]
#L1MdGf_I     .A. . . . .A. .CA.Y. .C . . . . .AA. . . . .A. . . . . . . . . . [ 240]
#L1MdGf_II    . . . . .AA. . . .C . . . . .AA. . . . .A. . . . .C.AG. .G AAGACATTAA AGAGGAAACA [ 240]
#L1MdTf_I     . . . . .A. .A . . . . .AA. . . . .A. . . . . . . . . . . . . . . [ 240]
#L1MdTf_II    . . . . .A. .A . . . . .AA. . . . .A. . . . . . . . . . . . . . . [ 240]
#L1MdTf_III   . . . . .A. .A . . . . .AA. . . . .A. . . . . . . . . . . . . . . [ 240]
#L1MdA_V      . . . . .A. .C . . . . .AA. . . . .A. . . . . . . . . . . . . . . [ 240]
#L1MdA_VI     . . . . .A. .C . . . . .AA. . . . .A. . . . .C. .G. .G AAGACCTTAA AGAGGAAGCA [ 240]
#L1MdF_V      . . . . .A. .C . . . . .AA. . . . .A. . . . . . . . . . . . . . . [ 240]
#L1MdF_IV     . . . . .A. .C . . . . .AA. . . . .A. . . . . . . . . . . . . . . [ 240]
#L1MdF_I      .A. . . . .A. .A. .C . . . . .AA. . . . .A. . . . . . . . . . . . . . . [ 240]
#L1MdF_II     . . . . .A. .C . . . . .AA. . . . .A. . . . . . . . . . . . . . . [ 240]
#L1MdF_III    . . . . .A. .C . . . . .AA. . . . .A. . . . .C. .G. .G AAGACATTAA AGAGGAAGCA [ 240]
#L1MdN_I      . . . . .A. . . .C . . . . .AA. . . . .A. . . . . . . . . . . . . . . [ 240]
#L1MdA_VII    . . . . .A. .C . . . . .AA. . . . .A. .A. . .C. .G. .G AAGACCTTAA AGAGGAAACA [ 240]
#L1MdMus_I    .T. . . . .G.A. .A. .C . . . . .AA. . . . .A.N. . . .S. .G. .G AAGCCCTTAA AGAGGAAGCA [ 240]
#L1MdFanc_I   . . . . .G.W. .A. .C . . . . .AA. . . . .A. . . . .G. . . . . . . . . . [ 240]
#L1MdV_I      .T. . . . . . . . . . . . . . .AA. . . . .A.A. .A.G. . .C. .G. .G AAGCCTTAA AGAGGAAACA [ 240]
#L1MdFanc_II  .T. . . . .G.A. .A. .C . . . . .AA. . . . .A. . . . .C. .G. .G AAGNCCTTAA AGAGGAAGCA [ 240]
#L1MdMus_II   .T. . . . .G.A. .A. .C . . . . .AA.D. .R. .D.A. . . . .C. .G. .G AAGTCCTTAA AGAGRAAACA [ 240]
#L1MdV_II     DT. . . . .AA.AA. .C . . . . .AA. . . . .D.A. .ATMC. .WY. .G. . . . . [ 240]
#L1Lx_I       .T. . . . .A. .A. .Y .C. . . . .AA. . . . .A. .A.N. . .C. .G. .G AAGYCCTTAA AGAGGAAACA [ 240]
#L1Lx_III     .T. . . . .R. . . .A.AA. .C . . . . .AA. . . . .A. .A.G. . .CG. .G AAGACCTTAA AGAGGAAACA [ 240]
#L1Lx_II      .T. . . . .A.AA. .C . . . . .AA. . . . .A. .A.G. . .C. .G. .G AAGCCCTTAA AGAGGAAACA [ 240]
#L1Lx_IV      .T. . . . .A.AA. .C . . . . .AA. . . . .D. . . .A.A.G. . .C. .G. .G AAGCCCTTAA AGAGGAAACA [ 240]
#L1MdV_III    .T. . . . .A.AA. .C . . . . .AA. . . . .A. .A.G. . .C. .M. .G AAGCCCTTAA AGAGGAAACA [ 240]

```

```

#L1MdA_I --CAGGCTC- TTAAAGAAAA GCAGGAAAAC ACAGCCAAAC AGGT----- [ 320]
#L1MdA_II --.....C- ..... [ 320]
#L1MdA_III --.....C- ..... [ 320]
#L1MdA_IV --.....YC- ..... [ 320]
#L1MdGf_I --..A.TC- ..... [ 320]
#L1MdGf_II CAA.AATC.C .....TT A.....T.A.....AGAAGA CATTAAAGAG GAAACACAAA AATCCCTTAA [ 320]
#L1MdTf_I --..A.TC- ..... [ 320]
#L1MdTf_II --..A.TC- ..... [ 320]
#L1MdTf_III --..A.TC- ..... [ 320]
#L1MdA_V --..A.TC- ..... [ 320]
#L1MdA_VI CAA.AATC.C .....TT .....GA..... [ 320]
#L1MdF_V --..A.TC- ..... [ 320]
#L1MdF_IV --..A.TC- ..... [ 320]
#L1MdF_I --..A.TC- ..... [ 320]
#L1MdF_II --..A.TC- ..... [ 320]
#L1MdF_III CAA.AATC.C .....TT ..... [ 320]
#L1MdN_I --..A.TC- ..... [ 320]
#L1MdA_VII CAA.AAT..C .....TT .....GA..... [ 320]
#L1MdMus_I CAA.AATC.C .C..G..TT A...G...T..T...AGAAG- ---TCCTTAA [ 320]
#L1MdFanc_I --G.A.TC- .....DT A..... [ 320]
#L1MdV_I CAA.AATB.C ..G...GTT A.....TA..... [ 320]
#L1MdFanc_II CAA.AATC.C .C.....TT A.....T..T...AGAAGA CCTTAAAGAG GAAACACAAA AATCCCTTAA [ 320]
#L1MdMus_II CAA.AATC.C .D..R..TT A..... [ 320]
#L1MdV_II ..... [ 320]
#L1Lx_I CAA.AATC.C .....TT AY..... [ 320]
#L1Lx_III CAA.AATC.C .....TT A..... [ 320]
#L1Lx_II CAA.AATC.C .....TT AB.....AH..... [ 320]
#L1Lx_IV VAA.AATC.C .....TT A.....AH..... [ 320]
#L1MdV_III CAA.AATC.C .....TT A.....AT..... [ 320]

#L1MdA_I ..... [ 400]
#L1MdA_II AGAAAAACAG GAAAACACAT CCAAACAGGT ..... [ 400]
#L1MdA_III AGAAAAACAG GAAAACACAT CCAAACAGGT ..... [ 400]
#L1MdA_IV AGAAAAACAG GAAAACACAT CCAAACAGGT ..... [ 400]
#L1MdGf_I AGAAAAACAG GAAAACACAA CCAAACAGGT AGAAG-----TCC TTATAGAAAA ACAGGAAAAC ACATCCAAAC [ 400]
#L1MdGf_II AGAATTGCAG GAAAACACAA CCAAACAGGT ..... [ 400]
#L1MdTf_I AGAAAAAGAG GAAAACACAT ACAAACAGGT ..... [ 400]
#L1MdTf_II AGAAAAAGAG GAAAACACAT ACAAACAGGT ..... [ 400]
#L1MdTf_III AGAAAAAGAG GAAAACACAT ACAAACAGGT ..... [ 400]
#L1MdA_V AGAAAAACAG GAAAACACAT CCAAACAGGT ..... [ 400]
#L1MdA_VI ..... [ 400]
#L1MdF_V ..... [ 400]
#L1MdF_IV AGAAAAACAG GAAAACACAT CCAAACAGGT ..... [ 400]
#L1MdF_I AGAAAAACAG GAAAACACAT CCAAACAGGT ..... [ 400]
#L1MdF_II AGAAAAAGAG GAAAACACAT CCAAACAGGT ..... [ 400]
#L1MdF_III ..... [ 400]
#L1MdN_I AGAAAAACAG GAAAACACAT CCAAACAGGT ..... [ 400]
#L1MdA_VII ..... [ 400]
#L1MdMus_I AGAACTACAG GCAAACTG CTAAACAGGT AGAAGAAACA CAAAATCCC TTAAAGAATT ACAGGAAAAC ACAACCAAAC [ 400]
#L1MdFanc_I ..... [ 400]
#L1MdV_I ..... [ 400]
#L1MdFanc_II AGAATTACAG GAAAACACAA CCAAACAGGT ..... [ 400]
#L1MdMus_II ..... [ 400]
#L1MdV_II ..... [ 400]
#L1Lx_I ..... [ 400]
#L1Lx_III ..... [ 400]
#L1Lx_II ..... [ 400]
#L1Lx_IV ..... [ 400]
#L1MdV_III ..... [ 400]

#L1MdA_I ----GATGGA AATGAACAAA ACCATACTAG AACTAAAAGG GGAAGTAGAC ACAATAAAGA AAACCCAAAG CGAGGCAACG [ 480]
#L1MdA_II ..... [ 480]
#L1MdA_III ---A..... [ 480]
#L1MdA_IV ..... [ 480]
#L1MdGf_I AGGT..... [ 480]
#L1MdGf_II .....T...T...C.A..C..A.. [ 480]
#L1MdTf_I ..... [ 480]
#L1MdTf_II ..... [ 480]
#L1MdTf_III ..... [ 480]
#L1MdA_V ..... [ 480]
#L1MdA_VI .....T...T...C.A..C..A.. [ 480]
#L1MdF_V ..... [ 480]
#L1MdF_IV ..... [ 480]
#L1MdF_I ..... [ 480]
#L1MdF_II ..... [ 480]
#L1MdF_III .....T...T...C.A..C..A.. [ 480]
#L1MdN_I ..... [ 480]
#L1MdA_VII .....T...T...C.A..CA..A.. [ 480]
#L1MdMus_I AGGCA.....T...C.A..T...AT...A...G... [ 480]
#L1MdFanc_I .....T...C.A..C..A.. [ 480]
#L1MdV_I .....T...C.A.G..T...AT...A... [ 480]
#L1MdFanc_II .....T...C.A..T...AT...A...H... [ 480]
#L1MdMus_II .....T...C.A..T...AT...D...A...R... [ 480]
#L1MdV_II .....AA..T...CYAG..T...AT...A...T.A...G...A.H.T [ 480]
#L1Lx_I .....T...C.A.R..T...AT...A...W.A...G...A...T [ 480]
#L1Lx_III .....A...C.....H.G.C.AG..T...AT...A...A...T.A...G...A...A [ 480]
#L1Lx_II .....A...N.....C.AGD..T...AT...V...A...T.A...G...A...T [ 480]
#L1Lx_IV .....A...T...C.A.G..T...NT...A...D.A...T.A...G...A...C [ 480]
#L1MdV_III .....A...C.A..T...AT...A...A...T.A...G...A...C [ 480]

```

```

#L1MdA_I      CTGGAGATAG AAACCCCTAGG AAAGAGATCT GGAACCATAG ATGCGAGCAT CAGCAACAGA ATACAAGAAA TGGAAGAGAG [ 560]
#L1MdA_II     .....
#L1MdA_III    .....
#L1MdA_IV     .....
#L1MdGf_I     .....A.....A.....C.....G..... [ 560]
#L1MdGf_II    G.....A.....A..... [ 560]
#L1MdTf_I     ..A.....A.....TT.....G..... [ 560]
#L1MdTf_II    ..A.....A.....TT.....G..... [ 560]
#L1MdTf_III   .....A.....TT.....G..... [ 560]
#L1MdA_V      .....A.....C.....G..... [ 560]
#L1MdA_VI     .....A.....A.....G..... [ 560]
#L1MdF_V      .....A.....G..... [ 560]
#L1MdF_IV     .....A.....G..... [ 560]
#L1MdF_I      .....A.....C.....G..... [ 560]
#L1MdF_II     .....A.....TY.....G..... [ 560]
#L1MdF_III    .....A.....G..... [ 560]
#L1MdN_I      .....A.....C.....G..... [ 560]
#L1MdA_VII    .....A.....G..... [ 560]
#L1MdMus_I    .....A..A.....T.....G..... [ 560]
#L1MdFanc_I   .....A.....G..... [ 560]
#L1MdV_I      .....A..A.....G..... [ 560]
#L1MdFanc_II  .....T.....A..A.....G..... [ 560]
#L1MdMus_II   .....Y.....A..A.....G..... [ 560]
#L1MdV_II     .....R.....A.....AG..A...R...D...A.....A.C.....G...R..... [ 560]
#L1Lx_I       .....T.....A..A...R.....A.....B.....G...R..... [ 560]
#L1Lx_III     .....A.....Y.A...GT.....A.....C.....G...A..... [ 560]
#L1Lx_II      .....AN.....A...GT.....C.....G...A.....D [ 560]
#L1Lx_IV      .....A.....A...GT.....A.....C.....G...A..... [ 560]
#L1MdV_III    .....T.....A.....A...GT.....R.A.....C.....G...A..... [ 560]

```

```

#L1MdA_I      AATCTCAGGT GCAGAAGATT CCATAGAGAA CATCGACACA ACAGTCAAAG AAAATACAAA ATGCAAAAGG ATCCTAACTC [ 640]
#L1MdA_II     .....
#L1MdA_III    .....
#L1MdA_IV     .....G.....A..... [ 640]
#L1MdGf_I     .....C.....G.....A.....GG...A..... [ 640]
#L1MdGf_II    .....G.....A.....GG...A..... [ 640]
#L1MdTf_I     .....G.....A.....GG...A..... [ 640]
#L1MdTf_II    .....G.....A.....GG...A..... [ 640]
#L1MdTf_III   .....G.....A.....GG...A..... [ 640]
#L1MdA_V      .....G.....A.....T.....C.....A..... [ 640]
#L1MdA_VI     .....G.....A.....A..... [ 640]
#L1MdF_V      .....G.....A.....G.....A..... [ 640]
#L1MdF_IV     .....G.....A.....G.....A..... [ 640]
#L1MdF_I      .....G.....A.....GG...A..... [ 640]
#L1MdF_II     .....G.....A.....GG...A..... [ 640]
#L1MdF_III    .....G.....A.....GV...A..... [ 640]
#L1MdN_I      .....G.....A.....T.....C.....A..... [ 640]
#L1MdA_VII    .....G.....A.....C.....A..... [ 640]
#L1MdMus_I    .....G.....G.....A.....G.....A..... [ 640]
#L1MdFanc_I   .....A.....G.G...A.....G.....A..... [ 640]
#L1MdV_I      .....R.....G.....A.....G.....A..... [ 640]
#L1MdFanc_II  .....A.....G.....A.....G.....A..... [ 640]
#L1MdMus_II   .....R.....G.....A.....G.....A.....Y..... [ 640]
#L1MdV_II     .....A.....A.....A.....G.G...A.....Y..... [ 640]
#L1Lx_I       .....A.....A.....A.....G.....A.....H..... [ 640]
#L1Lx_III     .....D.....A.....A...T.....B.....G.....V...A...N.....C..... [ 640]
#L1Lx_II      .....A...G...A...T.....DB...V...G.....AN...C..... [ 640]
#L1Lx_IV      .....A.....A.....T.....G.....A.....C.....C..... [ 640]
#L1MdV_III    .....G.....A.....A...T.....G.....A.....C.....C..... [ 640]

```

```

#L1MdA_I      AAAACATCCA GGTAATCCAG GACACAATGA GAAGACCAA CCTACGGATA ATAGGAATTG ATGAGAATGA AGATTTTCAA [ 720]
#L1MdA_II     .....
#L1MdA_III    .....A..... [ 720]
#L1MdA_IV     .....A.....G..... [ 720]
#L1MdGf_I     .....A.....G.G..... [ 720]
#L1MdGf_II    .....A.....G.....G.G..... [ 720]
#L1MdTf_I     .....T.....A.....A.....G.....G.G..... [ 720]
#L1MdTf_II    .....T.....A.....A.....G.....G.G..... [ 720]
#L1MdTf_III   .....T.....A.....G.....G.G..... [ 720]
#L1MdA_V      .....A.....G..... [ 720]
#L1MdA_VI     .....A.....G.A..... [ 720]
#L1MdF_V      .....A.....G.A..... [ 720]
#L1MdF_IV     .....A.....G.A..... [ 720]
#L1MdF_I      .....A.....G.G..... [ 720]
#L1MdF_II     .....T.....A.....G.G..... [ 720]
#L1MdF_III    .....A.....G.A..... [ 720]
#L1MdN_I      .....A.....G..... [ 720]
#L1MdA_VII    .....A.....G..... [ 720]
#L1MdMus_I    .....A.....G.A..... [ 720]
#L1MdFanc_I   .....A.....G.A..... [ 720]
#L1MdV_I      .....A.....G.A..... [ 720]
#L1MdFanc_II  .....A.....A.....T.A..... [ 720]
#L1MdMus_II   .....H.....A.....D.T.A..... [ 720]
#L1MdV_II     .....H.....A.....T.A...C...D...Y..... [ 720]
#L1Lx_I       .....N.....A.....T.A..... [ 720]
#L1Lx_III     .....A.....A.....T.A...A...G...CH..... [ 720]
#L1Lx_II      .....G.....A...H.....A.....T.A...A...GC...HC..... [ 720]
#L1Lx_IV      .....A.....A.....T.A...A...G...CC..... [ 720]
#L1MdV_III    .....A.....A.....T.A...A...G...D...CC..... [ 720]

```

|              |            |            |            |            |            |            |            |            |        |
|--------------|------------|------------|------------|------------|------------|------------|------------|------------|--------|
| #L1MdA_I     | CTTAAAGGGC | CAGCTAATAT | CTTCAACAAA | ATAATAGAAG | AAAACCTCCC | AAACATAAAA | AAAGAGATGC | CCATGATCAT | [ 800] |
| #L1MdA_II    | .....      | .....      | .....      | .....      | .....      | .....      | .....      | .....      | [ 800] |
| #L1MdA_III   | .....      | .....      | .....      | .....      | .....      | .....G     | .....      | .....      | [ 800] |
| #L1MdA_IV    | .....      | .....A     | .....      | .....      | .....      | .....G     | .....      | .....      | [ 800] |
| #L1MdGf_I    | .C....A.   | ...A.C.    | .....      | .T.T.      | .....      | .TC.G      | .....      | ...A.      | [ 800] |
| #L1MdGf_II   | .C....A.   | ...A.C.    | .....G     | .T.T.      | .....      | .TC.G      | .....A.    | ...A.      | [ 800] |
| #L1MdTf_I    | .C....T.   | ...A.C.    | .....      | .T.T.      | .....      | .TC.G      | ...T.      | AT...A.    | [ 800] |
| #L1MdTf_II   | .C....T.   | ...A.C.    | .....      | .T.T.      | .....      | .TC.G      | ...T.      | AT...A.    | [ 800] |
| #L1MdTf_III  | .C....A.   | ...A.C.    | .....      | .T.T.      | .....      | .T.G       | .....A.    | T...A.     | [ 800] |
| #L1MdA_V     | .....      | .G.A.      | .....      | .T.        | .....      | .C.G       | ...T.C.    | .....A.    | [ 800] |
| #L1MdA_VI    | .....      | ...A.      | .....      | .T.        | .....      | .C.G       | .....      | ...A.      | [ 800] |
| #L1MdF_V     | .....      | ...A.      | .....      | .T.        | .....      | .C.G       | .....      | ...A.      | [ 800] |
| #L1MdF_IV    | .....      | ...A.      | .....      | .T.        | .....      | .C.G       | .....      | ...A.      | [ 800] |
| #L1MdF_I     | .C....A.   | ...A.C.    | .....      | .T.T.      | .....      | .TC.G      | .....      | ...A.      | [ 800] |
| #L1MdF_II    | .C....A.   | ...A.C.    | .....      | .T.T.      | .....      | .TC.G      | .....      | ...A.      | [ 800] |
| #L1MdF_III   | .C....A.   | .G.A.      | .....      | .T.        | .....      | .C.G       | .....      | ...A.      | [ 800] |
| #L1MdN_I     | .....      | ...A.      | A          | .T.        | .....      | .C.G       | ...T.C.    | .....A.    | [ 800] |
| #L1MdA_VII   | .....      | ...A.      | .....      | .T.        | .....      | .C.G       | ...T.C.    | .....A.    | [ 800] |
| #L1MdMus_I   | .....      | ...A.      | .....      | .T.        | .....      | .T.C.G     | .....      | ...A.      | [ 800] |
| #L1MdFanc_I  | .....      | ...A.      | .....      | .T.        | .....      | .C.G       | .....      | ...A.      | [ 800] |
| #L1MdV_I     | .....      | ...A.      | .....      | .T.        | .....      | .W.C.G     | .....      | ...A.      | [ 800] |
| #L1MdFanc_II | .....      | .TA.       | .....      | .T.        | .....      | .T.C.G     | .....      | ...A.      | [ 800] |
| #L1MdMus_II  | .....      | .TA.       | .....      | .T.        | .....      | .Y.C.G     | .....Y     | ...A.      | [ 800] |
| #L1MdV_II    | .....      | .TA.       | .....      | .T.        | .....      | .Y.C.G     | .....      | ...A.      | [ 800] |
| #L1Lx_I      | .....      | .TA.       | .....      | .T.        | .....      | .T.H.G     | .....      | ...A.      | [ 800] |
| #L1Lx_III    | .....      | .TA.       | .....      | .T.        | .....      | .T.C.G     | ...N.      | ...A.      | [ 800] |
| #L1Lx_II     | .....D.    | .TA.       | .....      | .T.        | .....      | .T.C.G     | .....      | ...A.      | [ 800] |
| #L1Lx_IV     | .....      | .TA.       | .....      | .T.        | .....      | .T.C.G     | .....Y     | .R.A.      | [ 800] |
| #L1MdV_III   | .....      | .TA.       | .....      | .T.        | .....      | .T.C.G     | .....      | ...A.      | [ 800] |

|              |            |            |           |            |            |           |            |            |        |
|--------------|------------|------------|-----------|------------|------------|-----------|------------|------------|--------|
| #L1MdA_I     | ACAAGAAGCA | TACAGAAGCT | CAATAGACT | GGACCAGAAA | AGAAATTCCT | CCCAGACAT | AATAATCAGA | ACAACAAATG | [ 880] |
| #L1MdA_II    | .....C     | .....      | .....     | .....      | .....      | .....     | .....      | .....      | [ 880] |
| #L1MdA_III   | .....C     | .....      | .....     | .....      | .....      | .....     | .....      | .....      | [ 880] |
| #L1MdA_IV    | .....C     | .....      | .....     | .....      | .....      | .....     | .....      | .....      | [ 880] |
| #L1MdGf_I    | .....C     | .....      | .....     | .....      | .....      | .....     | .....      | ...C       | [ 880] |
| #L1MdGf_II   | .....C     | .....      | .....     | .....      | .....      | .....     | .....      | .....      | [ 880] |
| #L1MdTf_I    | .....C     | .....      | .....     | .....      | .....      | .....     | .....      | ...T       | [ 880] |
| #L1MdTf_II   | .....C     | .....      | .....     | .....      | .....      | .....     | .....      | ...T       | [ 880] |
| #L1MdTf_III  | .....C     | .....      | .....     | .....      | .....      | .....     | .....      | .....      | [ 880] |
| #L1MdA_V     | .....C     | .....      | .....     | .....      | .....      | .....     | .....      | .....      | [ 880] |
| #L1MdA_VI    | .....C     | .....      | .....     | .....      | .....      | .....     | .....      | .....      | [ 880] |
| #L1MdF_V     | .....C     | .....      | .....     | .....      | .....      | .....     | .....      | .....      | [ 880] |
| #L1MdF_IV    | .....C     | .....      | .....     | .....      | .....      | .....     | .....      | .....      | [ 880] |
| #L1MdF_I     | .....C     | .....      | .....     | .....      | .....      | .....     | .....      | ...T       | [ 880] |
| #L1MdF_II    | .....C     | .....      | .....     | .....      | .....      | .....     | .....      | .....      | [ 880] |
| #L1MdF_III   | .....C     | .....      | .....     | .....      | .....      | .....     | .....      | .....      | [ 880] |
| #L1MdN_I     | .....C     | .....      | .....     | .....      | .....      | .....     | .....      | .....      | [ 880] |
| #L1MdA_VII   | .....C     | .....      | .....     | .....      | .....      | ...Y      | .....      | .....      | [ 880] |
| #L1MdMus_I   | .....C     | .....      | .....     | .....      | .....      | .....     | .....      | .....      | [ 880] |
| #L1MdFanc_I  | .....C     | .....      | .....     | .....      | .....      | .....     | .....      | .....      | [ 880] |
| #L1MdV_I     | .....C     | .....      | .....     | .....      | .....      | .....     | .....      | .....      | [ 880] |
| #L1MdFanc_II | .....C     | .....      | .....     | .....      | .....      | .....     | .....      | .....      | [ 880] |
| #L1MdMus_II  | .....C     | .....      | .....     | .....      | .....      | .....     | .....      | .....      | [ 880] |
| #L1MdV_II    | .....C     | .....      | ...NT     | .....      | .....      | ...W      | ...A       | ...C       | [ 880] |
| #L1Lx_I      | .....YC    | .....      | ...D      | .....      | .....      | ...H      | ...R       | ...C       | [ 880] |
| #L1Lx_III    | .....C     | .....      | ...T      | .....      | .....      | ...T      | ...A       | ...C       | [ 880] |
| #L1Lx_II     | .H.....C   | .....G     | ...N      | .....      | ...H       | ...Y      | ...T       | ...G       | [ 880] |
| #L1Lx_IV     | .V.....C   | .....      | ...T      | .....      | .....      | ...AT     | ...G       | ...A       | [ 880] |
| #L1MdV_III   | .....C     | .....      | .....     | .....      | .....      | ...T      | ...A       | ...C       | [ 880] |

|              |            |            |            |            |            |            |            |            |        |
|--------------|------------|------------|------------|------------|------------|------------|------------|------------|--------|
| #L1MdA_I     | CACTAAATAA | AGATAGAATA | TTAAAAGCAG | TAAGGGAGAA | AGGTCAAGTA | ACATATAAAG | GAAGGCCTAT | CAGAATTACA | [ 960] |
| #L1MdA_II    | .....      | .....      | .....      | .....      | .....      | .....      | .....      | .....      | [ 960] |
| #L1MdA_III   | .....      | .....      | .....      | .....      | .....      | .....      | .....      | .....      | [ 960] |
| #L1MdA_IV    | .....      | .....      | .....      | .....      | .....      | .....      | ...C       | .....      | [ 960] |
| #L1MdGf_I    | .....      | .....      | C          | .....      | A          | .....      | .C.A       | .....      | [ 960] |
| #L1MdGf_II   | .....      | .....      | C          | .....      | A          | .....      | .C.A       | .....      | [ 960] |
| #L1MdTf_I    | .....      | .....      | C          | .....      | A          | .....      | .C.A       | .....      | [ 960] |
| #L1MdTf_II   | .....      | .....      | C          | .....      | A          | .....      | .C.A       | .....      | [ 960] |
| #L1MdTf_III  | .....      | .....      | C          | .....      | A          | .....      | .C.A       | .....      | [ 960] |
| #L1MdA_V     | .....      | ...G       | .....      | .....      | .....      | .....      | .C.A       | .....      | [ 960] |
| #L1MdA_VI    | .....      | .....      | .....      | .....      | .....      | .....      | .C         | .....      | [ 960] |
| #L1MdF_V     | .....      | .....      | .....      | .....      | .....      | .....      | .C         | .....      | [ 960] |
| #L1MdF_IV    | .....      | .....      | .....      | .....      | .....      | .....      | .C         | .....      | [ 960] |
| #L1MdF_I     | .....      | .....      | C          | .....      | A          | .....      | .C.A       | .....      | [ 960] |
| #L1MdF_II    | .....      | .....      | C          | .....      | A          | .....      | .C.A       | .....      | [ 960] |
| #L1MdF_III   | .....      | .....      | C          | .....      | A          | .....      | .C.A       | .....      | [ 960] |
| #L1MdN_I     | .....      | ...D       | .....      | .....      | .....      | .....      | .C.A       | .....      | [ 960] |
| #L1MdA_VII   | .....      | ...G       | .....      | .....      | .....      | .....      | .C         | .....      | [ 960] |
| #L1MdMus_I   | .....      | ...C       | .....      | ...A       | .....      | .....      | .C         | ...T       | [ 960] |
| #L1MdFanc_I  | .....      | .....      | .....      | ...A       | .....      | .....      | .C         | ...T       | [ 960] |
| #L1MdV_I     | .....      | ...C       | ...D       | .....      | ...A       | .....      | .C         | ...T       | [ 960] |
| #L1MdFanc_II | .....      | .....      | .....      | ...A       | .....      | .....      | .C         | ...A       | [ 960] |
| #L1MdMus_II  | .....      | ...CG      | .....      | ...A       | .....      | .....      | .C         | ...R       | [ 960] |
| #L1MdV_II    | ...A...C   | ...A       | .....      | ...A       | ...D       | .....      | .C         | ...A       | [ 960] |
| #L1Lx_I      | .....Y     | ...H       | ...C       | ...A       | ...N       | ...Y       | ...C       | ...A       | [ 960] |
| #L1Lx_III    | .....C     | ...A       | .....      | ...A       | .....      | .....      | .C         | ...A       | [ 960] |
| #L1Lx_II     | ...A...C   | ...A       | .....      | ...A       | .....      | .....      | .C         | ...A       | [ 960] |
| #L1Lx_IV     | ...A...C   | ...A       | .....      | ...A       | ...D       | .....      | .C         | ...A       | [ 960] |
| #L1MdV_III   | ...Y...Y   | ...A       | .....      | ...A       | ...B       | .....      | .C         | ...AB      | [ 960] |

|              |                  |            |             |             |                          |             |             |             |        |
|--------------|------------------|------------|-------------|-------------|--------------------------|-------------|-------------|-------------|--------|
| #L1MdA_I     | CCAGACTTTT       | CACCAGAGAC | TATGAAAGCC  | AGAAGAGCCT  | GGACAGATGT               | TATACAGACA  | CTAAGAGAAC  | ACAAATGCCA  | [1040] |
| #L1MdA_II    | .....            | .....      | .....       | .....       | .....                    | .....       | .....       | .....       | [1040] |
| #L1MdA_III   | .....            | .....      | .....       | .....       | .....                    | .....       | .....       | .....       | [1040] |
| #L1MdA_IV    | .....            | .....      | .....       | .....       | .....                    | .....       | .....       | .....       | [1040] |
| #L1MdGf_I    | .....T.....      | .....      | .....       | .....       | .....W.....              | .....       | .....       | .....Y..... | [1040] |
| #L1MdGf_II   | .....T.....      | .....      | .....       | .....       | .....                    | .....       | .....       | .....T..... | [1040] |
| #L1MdTf_I    | .....T.....      | .....      | .....       | .....       | .....                    | .....       | .....       | .....CTG..  | [1040] |
| #L1MdTf_II   | .....T.....      | .....      | .....       | .....       | .....                    | .....       | .....       | .....CTG..  | [1040] |
| #L1MdTf_III  | .....T.....      | .....      | .....       | .....       | .....                    | .....       | .....       | .....T..... | [1040] |
| #L1MdA_V     | .....            | .....      | .....       | .....       | .....                    | .....       | .....       | .....       | [1040] |
| #L1MdA_VI    | .....            | .....      | .....       | .....T..... | .....                    | .....       | .....M..... | .....       | [1040] |
| #L1MdF_V     | .....            | .....      | .....       | .....T..... | .....                    | .....       | .....       | .....       | [1040] |
| #L1MdF_IV    | .....Y.....      | .....      | .....       | .....T..... | .....                    | .....       | .....       | .....       | [1040] |
| #L1MdF_I     | .....T.....      | .....      | .....       | .....       | .....                    | .....       | .....       | .....T..... | [1040] |
| #L1MdF_II    | .....T.....      | .....      | .....       | .....       | .....                    | .....       | .....       | .....T..... | [1040] |
| #L1MdF_III   | .....T.....      | .....      | .....       | .....       | .....                    | .....       | .....       | .....T..... | [1040] |
| #L1MdN_I     | .....            | .....      | .....       | .....       | .....                    | .....       | .....       | .....       | [1040] |
| #L1MdA_VII   | .....            | .....      | .....       | .....       | .....                    | .....       | .....       | .....       | [1040] |
| #L1MdMus_I   | .....C.....      | .....      | .....       | .....T..... | .....                    | .....       | .....       | .....       | [1040] |
| #L1MdFanc_I  | .....C.....      | .....      | .....       | .....T..... | .....                    | .....D..... | .....C..... | .....       | [1040] |
| #L1MdV_I     | .....C.....      | .....      | .....       | .....T..... | .....                    | .....       | .....       | .....       | [1040] |
| #L1MdFanc_II | .....C.....      | .....      | .....       | .....T..... | .....                    | .....       | .....C..... | .....       | [1040] |
| #L1MdMus_II  | .....C.....      | .....      | .....       | .....T..... | .....R.....              | .....       | .....       | .....Y..... | [1040] |
| #L1MdV_II    | ..W....C..M..... | .....      | .....       | .....T..... | ..G.....                 | C.....      | C.....      | .....       | [1040] |
| #L1Lx_I      | .....C.....      | .....      | .....       | .....T..... | .....                    | .....       | .....       | .....       | [1040] |
| #L1Lx_III    | .....C.....      | ..N.....   | .....T..... | .....T..... | ..G....V..C...B...C..... | .....       | .....       | .....       | [1040] |
| #L1Lx_II     | .....C.....      | ..G.....   | ..C.....    | .....T..... | ..G....C..C.....         | .....H..... | .....B..... | .....       | [1040] |
| #L1Lx_IV     | .....C.....      | .....      | .....T..... | .....T..... | ..G....C..C.....         | .....       | .....       | .....       | [1040] |
| #L1MdV_III   | .....C.....      | .....      | .....Y..... | .....T..... | ..G....C..C.....         | .....       | .....       | .....       | [1040] |

|              |                |              |             |             |              |             |               |                 |        |
|--------------|----------------|--------------|-------------|-------------|--------------|-------------|---------------|-----------------|--------|
| #L1MdA_I     | GCCCAGGCTA     | CTATACCCGG   | CCAAACTCTC  | AATTACCATA  | GATGGAGAAA   | CCAAAGTATT  | CCACGACAAA    | ACCAAGTTCA      | [1120] |
| #L1MdA_II    | .....          | .....        | .....       | .....       | .....        | .....       | .....         | .....A.....     | [1120] |
| #L1MdA_III   | .....          | .....        | .....       | .....       | .....        | .....       | .....         | .....A.....     | [1120] |
| #L1MdA_IV    | .....          | .....        | .....       | .....       | .....        | .....       | .....         | .....A.....     | [1120] |
| #L1MdGf_I    | .....          | .....A.....  | .....       | .....       | .....        | .....       | .....         | .....T.A.....   | [1120] |
| #L1MdGf_II   | .....          | .....A.....  | .....       | .....Y..... | .....        | .....       | .....         | .....T.A.....   | [1120] |
| #L1MdTf_I    | .....          | .....A.....  | .....       | .....T..... | ..G.....     | .....       | .....         | .....A.....     | [1120] |
| #L1MdTf_II   | .....          | .....A.....  | .....       | .....T..... | ..G.....     | .....       | .....         | .....A.....     | [1120] |
| #L1MdTf_III  | .....          | .....A.....  | .....       | .....       | .....        | .....       | .....         | .....A.....     | [1120] |
| #L1MdA_V     | .....          | .....        | .....       | .....       | .....        | .....       | .....         | .....A.....     | [1120] |
| #L1MdA_VI    | .....          | .....A.....  | .....       | .....       | .....        | .....       | .....         | .....A.....     | [1120] |
| #L1MdF_V     | .....          | .....A.....  | .....       | .....T..... | .....        | .....       | .....Y.....   | .....A.....     | [1120] |
| #L1MdF_IV    | .....          | .....A.....  | .....       | .....Y..... | .....        | .....       | .....         | .....A.....     | [1120] |
| #L1MdF_I     | .....          | .....A.....  | .....       | .....       | .....        | .....       | .....         | .....T.A.....   | [1120] |
| #L1MdF_II    | .....          | .....A.....  | .....       | .....       | .....        | .....       | .....         | .....A.....     | [1120] |
| #L1MdF_III   | .....          | .....A.....  | .....       | .....       | .....        | .....       | .....         | .....A.....     | [1120] |
| #L1MdN_I     | .....          | .....        | .....       | .....       | .....        | .....       | .....         | .....A.....     | [1120] |
| #L1MdA_VII   | .....          | .....        | .....       | .....       | .....        | .....       | .....         | .....A.....     | [1120] |
| #L1MdMus_I   | .....          | .....A.....  | .....A..... | .....       | .....        | .....       | .....T.....   | .....A.....     | [1120] |
| #L1MdFanc_I  | .....          | .....A.....  | .....A..... | .....       | .....        | .....       | .....T.Y..... | .....A.....     | [1120] |
| #L1MdV_I     | .....          | .....A.....  | .....H..... | .....       | .....        | .....       | .....T.....   | .....A.....     | [1120] |
| #L1MdFanc_II | .....          | .....A.....  | .....A..... | .....       | .....        | .....       | .....T.....   | .....A.....     | [1120] |
| #L1MdMus_II  | .....          | .....A.....  | .....A..... | .....       | .....        | .....       | .....T.....   | .....A.....     | [1120] |
| #L1MdV_II    | .....          | .....A.....  | .....A..... | .....       | .....        | .....G..... | .....T.....   | .....A.T.....   | [1120] |
| #L1Lx_I      | D....R.....    | .....HA..... | .....A..... | .....H..... | .....        | .....       | .....T.....   | .....A.Y.....   | [1120] |
| #L1Lx_III    | D....A..D..... | .....C.....  | .....A..... | .....G..... | .....GA..... | .....       | .....T.....   | .....A.T.....   | [1120] |
| #L1Lx_II     | .....N.....    | .....A.....  | .....A..... | .....       | .....GA..... | .....       | .....T.....   | ..MN..A..T..... | [1120] |
| #L1Lx_IV     | .....R.....    | .....A.....  | .....A..... | .....       | .....GA..... | .....       | .....T.....   | ..AH..A..T..... | [1120] |
| #L1MdV_III   | .....          | .....A.....  | .....A..... | .....H..... | .....        | .....       | .....T.....   | .....A..T.....  | [1120] |

|              |             |              |             |             |              |              |             |                |        |
|--------------|-------------|--------------|-------------|-------------|--------------|--------------|-------------|----------------|--------|
| #L1MdA_I     | CACAATATCT  | TTCCACGAAT   | CCAGCCCTTC  | AAAGGATAAT  | AACAGAAAAG   | AAGCAATACA   | AGGACGGAAA  | TCACGCCCTA     | [1200] |
| #L1MdA_II    | .....       | .....        | .....       | .....       | .....        | .....        | .....       | .....          | [1200] |
| #L1MdA_III   | .....       | .....        | .....       | .....       | .....        | .....        | .....       | .....          | [1200] |
| #L1MdA_IV    | .....T..... | .....        | .....       | .....       | .....A.....  | .....A.....  | .....A..... | .....          | [1200] |
| #L1MdGf_I    | ..C..T..... | C.....       | .....       | .....       | .....A.....  | .....M.....  | .....G..... | C.....         | [1200] |
| #L1MdGf_II   | ..C..T..... | C.....       | .....       | .....       | .....A.....  | .....C.....  | .....G..... | C.....         | [1200] |
| #L1MdTf_I    | ..G..T..... | C.....       | .....       | .....       | .....A.....  | .....C.....  | .....A..... | ..G..CA.....   | [1200] |
| #L1MdTf_II   | ..G..T..... | C.....       | .....       | .....       | .....A.....  | .....C.....  | .....A..... | ..G..CA.....   | [1200] |
| #L1MdTf_III  | .....T..... | C.....       | .....       | .....T..... | .....A.....  | .....C.....  | .....A..... | ..G..CA.T..... | [1200] |
| #L1MdA_V     | .....T..... | .....        | .....       | .....       | .....        | .....        | .....       | .....          | [1200] |
| #L1MdA_VI    | .....T..... | .....        | .....       | .....       | .....A.....  | .....C.....  | .....       | C.....         | [1200] |
| #L1MdF_V     | .....T..... | .....        | .....       | .....       | .....A.....  | .....AA..... | .....       | C.....Y.....   | [1200] |
| #L1MdF_IV    | .....T..... | .....        | .....       | .....       | .....A.....  | .....A.....  | .....       | C.....Y.....   | [1200] |
| #L1MdF_I     | ..C..T..... | C.....       | .....       | .....       | .....A.....  | .....C.....  | .....       | ..G..C.....    | [1200] |
| #L1MdF_II    | .....T..... | C.....       | .....       | .....       | .....A.....  | .....C.....  | .....R..... | ..G..CM.....   | [1200] |
| #L1MdF_III   | .....T..... | .....        | .....       | .....       | .....A.....  | .....C.....  | .....       | C.....T.....   | [1200] |
| #L1MdN_I     | .....T..... | .....        | .....       | .....       | .....        | .....        | .....       | .....          | [1200] |
| #L1MdA_VII   | .....T..... | .....        | .....       | .....       | .....        | .....M.....  | .....       | .....          | [1200] |
| #L1MdMus_I   | .....       | .....        | .....       | .....       | ..AG..G...A  | C.C...C...   | ..A..T..... | BT..A.....     | [1200] |
| #L1MdFanc_I  | .....       | .....        | .....       | .....       | ..AG..G...A  | C.C...C...   | .....G..... | CT..A.....     | [1200] |
| #L1MdV_I     | .....       | .....        | .....       | .....       | ..G..R...A   | C.C...C...   | .....       | CT.....        | [1200] |
| #L1MdFanc_II | .....       | .....        | .....       | .....       | ..AG..G...A  | CTC...C...   | .....G..... | ..T.T.....     | [1200] |
| #L1MdMus_II  | .....       | .....        | .....       | .....       | ..AG..G...A  | CGC...C...   | .....       | ..T.....       | [1200] |
| #L1MdV_II    | .....       | .....A.....  | .....       | .....       | ..AG..G...A  | CTY...C...   | ..R..G..... | CT...Y.G.....  | [1200] |
| #L1Lx_I      | .....       | .....A.....  | .....Y..... | .....       | ..AG..G...A  | CTC...C...   | .....G..... | CT.....        | [1200] |
| #L1Lx_III    | ..H.N.....  | .....A.....  | .....A..... | .....       | ..GAT..G...A | CGC...C...   | .....G..... | CT..A.....     | [1200] |
| #L1Lx_II     | .....N..... | .....        | .....W..... | .....       | ..AT..G...A  | CTC...N..... | .....N..... | CT..A.....     | [1200] |
| #L1Lx_IV     | .....       | .....A.....  | .....A..... | .....       | ..GAT..G...A | CGC...Y..... | .....G..... | CT..A.....     | [1200] |
| #L1MdV_III   | .....       | .....BA..... | .....A..... | .....       | ..GAT..G...A | C.C...C...   | .....G..... | CT..A.....     | [1200] |

#L1MdA\_I GAACAACCAA GAAAGTAATC ---ATTCAAC AAACCAAAAA GAAGACAGCC ACAAGAACAG AATGCCAACT CTAACAACAA [1280]  
#L1MdA\_II .....G..... ---CC..... [1280]  
#L1MdA\_III .....A.G..... ---CC..... G..... W..... A..... [1280]  
#L1MdA\_IV .....A.A..... .GA..... ---CM..... .T..... .A..... T..... [1280]  
#L1MdGf\_I .....A.A..... .GA..... ---CC..... .A.T..... T..... [1280]  
#L1MdGf\_II .....A.A..... .G..... ---CC..... .T..... C.T..... T..... [1280]  
#L1MdTf\_I .....A.A..... .G..... ---CC..... .T..... C.T..... T..... [1280]  
#L1MdTf\_II .....A.A..... .G..... ---CC..... .T..... C.T..... T..... [1280]  
#L1MdTf\_III .....A.A..... .G..... ---CC..... .T..... S..... [1280]  
#L1MdA\_V .....A.G..... ---CC..... .M..... [1280]  
#L1MdA\_VI .....A.G..... ---C..... .T..... [1280]  
#L1MdF\_V .....A.G..... ---C..... .T..... [1280]  
#L1MdF\_IV .....A.A..... .GA..... ---CC..... .A.T..... T..... [1280]  
#L1MdF\_I .....A.A..... .G..... ---CC..... .T..... T..... [1280]  
#L1MdF\_II .....A.G..... .G..... ---CC..... .T..... T..... [1280]  
#L1MdF\_III .....A.G..... .G..... ---CC..... .T..... T..... [1280]  
#L1MdN\_I .....A.G..... ---CC..... [1280]  
#L1MdA\_VII .....A.G..... ---C.T..... .A.T..... .T.C..... T..... [1280]  
#L1MdMus\_I .....A.G..... ---C..... .T..... G..... .C..... T..... [1280]  
#L1MdFanc\_I .....A.G..... ---C..... .T..... B..... G..... .C..... [1280]  
#L1MdV\_I .....A.G..... ---T..... .T..... .T..... .T..... .V..... [1280]  
#L1MdFanc\_II .....A.G..... ---Y..... .B.H..... .N..... .C..... .C..... [1280]  
#L1MdMus\_II .....A.G..... TTCT..... .CG..... .T.A..... .CA..... T..... .AAA----- -..... T..... [1280]  
#L1Lx\_I .....A.G..... D...R..... TTCT..T..... .N..... .T.N..... .TA..... T..... T.H.CH..... V..... [1280]  
#L1Lx\_III .....A.G..... TTCT..... .C..... .T.R..... .CA..... T..... .AAV----- -..... T..... [1280]  
#L1Lx\_II .....A.G..... ---T..... .C..... .T..... .CA..... T..... .T..... C..... [1280]  
#L1Lx\_IV .....A.G..... ---T..... .C..... .T..... .CA..... T..... .T..... C..... [1280]  
#L1MdV\_III .....A.G..... ---T..... .C..... .T..... .CA..... T..... .T..... C..... [1280]

#L1MdA\_I AAATAAAAGG GAGCAACAAT TACTTTTCCT TAATATCTCT TAATATCAAT GGACTCAATT CCCCAATAAA AAGACATAGA [1360]  
#L1MdA\_II .....A..... [1360]  
#L1MdA\_III .....A..... [1360]  
#L1MdA\_IV .....A..... [1360]  
#L1MdGf\_I .....C..... A..... .C..... [1360]  
#L1MdGf\_II .....C.C..... A..... .T..... C..... [1360]  
#L1MdTf\_I .....C..... A..... .C..... .T..... C..... G..... [1360]  
#L1MdTf\_II .....C..... A..... .C..... .T..... C..... G..... [1360]  
#L1MdTf\_III .....C..... A..... .C..... .T..... C..... [1360]  
#L1MdA\_V .....T..... A..... [1360]  
#L1MdA\_VI .....T..... A..... [1360]  
#L1MdF\_V .....T..... A..... [1360]  
#L1MdF\_IV .....C..... A..... .T..... C..... [1360]  
#L1MdF\_I .....C..... A..... .T..... C..... [1360]  
#L1MdF\_II .....Y..... A..... .C..... [1360]  
#L1MdF\_III .....Y..... A..... .C..... [1360]  
#L1MdN\_I .....G.C..... A..... .T..... .G.T..... .C..... [1360]  
#L1MdA\_VII .....C..... A..... .T..... .T..... .C..... [1360]  
#L1MdMus\_I .....C..... A..... .Y..... .H..... .M..... .G..... [1360]  
#L1MdFanc\_I .....C..... A..... .C.G..... .D..... [1360]  
#L1MdV\_I .....C..... A..... .Y..... [1360]  
#L1MdFanc\_II .....C..... A..... .Y..... .H..... .M..... .G..... [1360]  
#L1MdMus\_II .....C..... A..... .C.G..... .D..... [1360]  
#L1Lx\_I .....C..... A..... .Y..... [1360]  
#L1Lx\_III H....C..... R..... C...A..... .C..... [1360]  
#L1Lx\_II .....N..... A.N..... C...A..... .C..... Y..... [1360]  
#L1Lx\_IV .....C..... A..... .C...A..... .C..... [1360]  
#L1MdV\_III .....C..... A.T..... C..... .C..... .G..... [1360]

#L1MdA\_I CTAACAGACT GGCTACACAA ACAGGACCCA ACATTCTGCT GCTTACAGGA AACCCATCTC AGGGAAAAAG ACAGACACTA [1440]  
#L1MdA\_II .....M..... [1440]  
#L1MdA\_III .....M..... [1440]  
#L1MdA\_IV .....M..... [1440]  
#L1MdGf\_I .....A..... .A..... .T..... .T..... .A..... .T..... [1440]  
#L1MdGf\_II .....A..... .A..... .T..... .T..... .A..... .T..... [1440]  
#L1MdTf\_I .....A..... .A..... .T..... .T..... G..A..... .A..... .T..... [1440]  
#L1MdTf\_II .....A..... .A..... .T..... .T..... G..A..... .A..... .T..... [1440]  
#L1MdTf\_III .....A..... .A..... .T..... .T..... G..A..... .A..... .T..... [1440]  
#L1MdA\_V .....A..... .A..... .T..... .T..... G..A..... .A..... .T..... [1440]  
#L1MdA\_VI .....A..... .A..... .T..... .T..... G..A..... .A..... .T..... [1440]  
#L1MdF\_V .....A..... .A..... .T..... .T..... G..A..... .A..... .T..... [1440]  
#L1MdF\_IV .....A..... .A..... .T..... .T..... G..A..... .A..... .T..... [1440]  
#L1MdF\_I .....A..... .A..... .T..... .T..... G..A..... .A..... .T..... [1440]  
#L1MdF\_II .....A..... .A..... .T..... .T..... G..A..... .A..... .T..... [1440]  
#L1MdF\_III .....A..... .A..... .T..... .T..... G..A..... .A..... .T..... [1440]  
#L1MdN\_I .....A..... .A..... .T..... .T..... G..A..... .A..... .T..... [1440]  
#L1MdA\_VII .....A..... .A..... .T..... .T..... G..A..... .A..... .T..... [1440]  
#L1MdMus\_I .....A..... .A..... .T..... .T..... G..A..... .A..... .T..... [1440]  
#L1MdFanc\_I .....A..... .A..... .T..... .T..... G..A..... .A..... .T..... [1440]  
#L1MdV\_I .....A..... .A..... .T..... .T..... G..A..... .A..... .T..... [1440]  
#L1MdFanc\_II .....A..... .A..... .T..... .T..... G..A..... .A..... .T..... [1440]  
#L1MdMus\_II .....A..... .A..... .T..... .T..... G..A..... .A..... .T..... [1440]  
#L1MdV\_II .....A..... .A..... .T..... .T..... G..A..... .A..... .T..... [1440]  
#L1Lx\_I .....A..... .A..... .T..... .T..... G..A..... .A..... .T..... [1440]  
#L1Lx\_III H....G..... Y...H..... .GT..... .N..... .T..... .A..... .G..CH..... .T.TC..... .A..... [1440]  
#L1Lx\_II .....R.A..... .GT..... .N..... .T..... .A..... .G..C..... .T.N..... .N..... [1440]  
#L1Lx\_IV .....A..... .GGT..... .G..... .T..... .A..... .V..... .G..C..... .T.TC..... .R..... [1440]  
#L1MdV\_III .....A..... .GGT..... .G..... .T..... .A..... .V..... .G..C..... .T.TC..... .R..... [1440]

|              |                   |            |              |             |             |            |            |            |        |
|--------------|-------------------|------------|--------------|-------------|-------------|------------|------------|------------|--------|
| #L1MdA_I     | CCTCAGAGTG        | AAAGGCTGGA | AAACAATTTT   | CCAAGCAAAT  | GGACTGAAGA  | AACAAGCTGG | AGTAGCCATT | TTAATATCGG | [1520] |
| #L1MdA_II    | .....             | .....      | .....        | .....       | .....       | .....      | .....      | .....      | [1520] |
| #L1MdA_III   | .....             | .....      | .....        | .....       | T.....      | .....      | .....      | C.....     | [1520] |
| #L1MdA_IV    | .....             | .....      | .....        | .....       | T.....      | .....      | .....      | C.G.....A  | [1520] |
| #L1MdGf_I    | .....             | .....      | .....        | .....       | T.....      | G.....     | .....      | C.....     | [1520] |
| #L1MdGf_II   | .....             | .....      | .....        | .....       | T.....      | .....      | .....      | .....      | [1520] |
| #L1MdTf_I    | .....A.....       | .....      | .....        | .....       | TA.....     | A.....     | .....      | C.....T.   | [1520] |
| #L1MdTf_II   | .....A.....       | .....      | .....        | .....       | TA.....     | A.....     | .....      | C.....T.   | [1520] |
| #L1MdTf_III  | .....A.A.....     | .....      | .....        | .....       | TA.....     | .....      | .....      | C.....T.   | [1520] |
| #L1MdA_V     | .....             | .....      | .....        | .....       | T.....      | .....      | .....      | C.....     | [1520] |
| #L1MdA_VI    | .....             | .....      | .....        | .....       | T.....      | .....      | .....      | C.....A    | [1520] |
| #L1MdF_V     | .....A.....       | .....      | .....        | .....       | T.....      | .....      | .....      | C.....KA   | [1520] |
| #L1MdF_IV    | .....R.....       | .....      | .....        | .....       | T.....      | .....      | .....      | C.....A    | [1520] |
| #L1MdF_I     | .....A.....       | .....      | .....        | .....       | TA.....     | .....      | .....      | Y.....T.   | [1520] |
| #L1MdF_II    | .....A.....       | .....      | .....        | .....       | TA.....     | .....      | .....      | C.....T.   | [1520] |
| #L1MdF_III   | .....A.....       | .....      | .....        | .....       | TA.....     | .....      | .....      | C.....TA   | [1520] |
| #L1MdN_I     | .....             | .....      | .....        | .....       | T.....      | .....      | .....      | C.....     | [1520] |
| #L1MdA_VII   | .....             | .....      | .....        | .....       | T.....      | .....      | .....      | C.....A    | [1520] |
| #L1MdMus_I   | .....A.....       | .....      | .....        | .....       | T.C.....    | .....      | .....      | C.....A    | [1520] |
| #L1MdFanc_I  | .....             | .....      | .....        | .....       | T.C.....    | .....      | .....      | C.....A    | [1520] |
| #L1MdV_I     | .....             | .....      | .....        | .....C..... | T.....      | .....      | .....      | C.....A    | [1520] |
| #L1MdFanc_II | .....A.....       | .....      | .....        | .....       | T.C.....    | .....      | .....      | C.....A    | [1520] |
| #L1MdMus_II  | .....RD.A.....    | .....      | .....        | .....       | T.Y.....    | B.....     | H.....     | C.....A    | [1520] |
| #L1MdV_II    | .....Y.....A..... | .....      | .....W.....  | .....       | R.T.CC..... | N.....     | .....      | C.....A    | [1520] |
| #L1Lx_I      | .....V.D.....     | .....      | .....        | .....       | T.CC.....   | .....      | .....      | C.....A    | [1520] |
| #L1Lx_III    | .....A.....       | G.....     | .....        | .....       | T.CC.....   | G.....     | .....      | C.....R    | [1520] |
| #L1Lx_II     | N.....A.....      | .....      | H.....Y..... | .....       | T.CN.....   | .....      | .....      | C.....A    | [1520] |
| #L1Lx_IV     | .....A.....       | G.....     | .....        | .....       | T.CC.....   | .....      | .....      | C.....A    | [1520] |
| #L1MdV_III   | .....A.....       | T.....     | H.....       | Y.....      | T.CC.....   | .....      | .....      | C.....AA   | [1520] |

|              |               |            |            |            |            |            |            |                      |        |
|--------------|---------------|------------|------------|------------|------------|------------|------------|----------------------|--------|
| #L1MdA_I     | ATAAAATCGA    | CTTCCAACCC | AAAGTTATCA | AAAAAGACAA | GGAGGGACAC | TTCATACTCA | TCAAAGGTAA | AATCCTCCAA           | [1600] |
| #L1MdA_II    | .....         | .....      | .....      | .....      | .....      | .....      | .....      | .....                | [1600] |
| #L1MdA_III   | .....         | .....      | .....      | .....      | .....      | .....      | .....      | .....                | [1600] |
| #L1MdA_IV    | .....         | .....      | .....      | .....      | .....      | .....      | .....      | .....                | [1600] |
| #L1MdGf_I    | .....         | .....      | .....      | .....      | .....      | .....      | .....      | .....                | [1600] |
| #L1MdGf_II   | .....         | .....      | T.....     | .....      | .....      | .....      | .....      | .....                | [1600] |
| #L1MdTf_I    | .....G.T..... | .....      | C.....     | .....      | .....      | T.....     | .....      | .....                | [1600] |
| #L1MdTf_II   | .....G.T..... | .....      | C.....     | .....      | .....      | T.....     | .....      | .....                | [1600] |
| #L1MdTf_III  | .....G.T..... | .....      | C.....     | .....      | .....      | G.....     | YG.T.....  | .....                | [1600] |
| #L1MdA_V     | .....         | .....      | .....      | .....      | .....      | .....      | .....      | .....                | [1600] |
| #L1MdA_VI    | .....         | .....      | .....      | .....      | .....      | .....      | .....      | .....                | [1600] |
| #L1MdF_V     | .....         | .....      | .....      | .....      | .....      | .....      | .....      | Y.....               | [1600] |
| #L1MdF_IV    | .....         | .....      | .....      | .....      | G.....     | .....      | .....      | T.....               | [1600] |
| #L1MdF_I     | .....G.T..... | .....      | H.....     | .....      | G.....     | .....      | .....      | .....                | [1600] |
| #L1MdF_II    | .....G.T..... | .....      | C.....     | .....      | G.....     | T.....     | .....      | .....                | [1600] |
| #L1MdF_III   | .....         | .....      | C.....     | .....      | G.....     | .....      | .....      | .....                | [1600] |
| #L1MdN_I     | .....         | .....      | .....      | .....      | .....      | .....      | .....      | .....                | [1600] |
| #L1MdA_VII   | .....         | .....      | .....      | .....      | .....      | .....      | .....      | .....                | [1600] |
| #L1MdMus_I   | .....         | .....      | .....      | .....      | G.....     | .....      | .....      | TA.....              | [1600] |
| #L1MdFanc_I  | .....T.....   | .....      | .....      | .....      | T.G.....   | .....      | .....      | TA.....              | [1600] |
| #L1MdV_I     | .....         | .....      | .....      | .....      | G.....     | .....      | .....      | T.....               | [1600] |
| #L1MdFanc_II | .....         | .....      | .....      | .....      | G.....     | .....      | .....      | T.....               | [1600] |
| #L1MdMus_II  | .....         | .....      | .....      | M.....     | C.....     | G.....     | .....      | T.....               | [1600] |
| #L1MdV_II    | .....         | T.....     | T.....     | M.....     | Y.....     | .....      | W.....     | BTA.....             | [1600] |
| #L1Lx_I      | .....         | T.....     | Y.....     | .....      | .....      | G.....     | .....      | TA.....              | [1600] |
| #L1Lx_III    | .....         | T.....     | A.....     | C.....     | R.T.....   | AR.....    | Y.....     | A.....TA.....        | [1600] |
| #L1Lx_II     | .....         | T.....     | NT.....    | .....      | D.T.....   | R.N.....   | G.....     | DA.....TA.....       | [1600] |
| #L1Lx_IV     | .....         | T.....     | A.....     | C.....     | .....      | T.....     | .....      | A.....TA.....        | [1600] |
| #L1MdV_III   | .....         | T.....     | A.....     | .....      | G.T.....   | R.A.....   | .....      | GG.....A.....TA..... | [1600] |

|              |             |            |            |           |            |            |            |                      |        |
|--------------|-------------|------------|------------|-----------|------------|------------|------------|----------------------|--------|
| #L1MdA_I     | GAGGAACTCT  | CAATTCTGAA | TATCTACGCA | CCAATGCAA | GGGCAGCCAC | ATTCATTAGA | GACACTTtag | TAAAGCTCAA           | [1680] |
| #L1MdA_II    | .....       | .....      | .....      | .....     | .....      | .....      | .....      | .....                | [1680] |
| #L1MdA_III   | .....       | .....      | .....      | T.....    | .....      | A.....     | .....      | .....                | [1680] |
| #L1MdA_IV    | .....       | .....      | .....      | T.C.....  | .....      | A.....     | Y.....     | .....                | [1680] |
| #L1MdGf_I    | .....       | .....      | .....      | T.....    | .....      | A.....     | .....      | .....                | [1680] |
| #L1MdGf_II   | .....       | .....      | .....      | T.....    | .....      | A.....     | .....      | .....                | [1680] |
| #L1MdTf_I    | .....       | .....      | T.....     | T.....    | A.....     | A.....     | C.A.....   | A.....               | [1680] |
| #L1MdTf_II   | .....       | .....      | T.....     | T.....    | A.....     | A.....     | C.A.....   | A.....               | [1680] |
| #L1MdTf_III  | .....       | .....      | T.....     | T.....    | A.....     | .....      | A.....     | A.....               | [1680] |
| #L1MdA_V     | .....       | .....      | .....      | T.....    | .....      | A.....     | .....      | .....                | [1680] |
| #L1MdA_VI    | .....       | .....      | T.....     | T.....    | .....      | A.....     | A.....     | .....                | [1680] |
| #L1MdF_V     | .....       | .....      | T.....     | T.....    | .....      | A.....     | A.....     | .....                | [1680] |
| #L1MdF_IV    | .....       | .....      | T.....     | T.....    | .....      | A.....     | N.....     | .....                | [1680] |
| #L1MdF_I     | .....       | .....      | T.....     | T.....    | A.....     | .....      | A.....     | .....                | [1680] |
| #L1MdF_II    | .....M..... | .....      | T.....     | T.....    | A.....     | .....      | A.....     | .....K.....          | [1680] |
| #L1MdF_III   | .....A..... | .....      | T.....     | T.....    | A.....     | .....      | A.....     | .....                | [1680] |
| #L1MdN_I     | .....       | .....      | .....      | T.....    | .....      | .....      | A.....     | .....                | [1680] |
| #L1MdA_VII   | .....       | .....      | .....      | T.....    | .....      | A.....     | .....      | .....                | [1680] |
| #L1MdMus_I   | .....T..... | A.....     | .....      | T.....    | T.....     | A.....     | A.....     | .....                | [1680] |
| #L1MdFanc_I  | .....T..... | .....      | .....      | T.....    | T.....     | A.....     | A.....     | .....                | [1680] |
| #L1MdV_I     | .....K..... | .....      | .....      | T.....    | T.....     | A.....     | A.....     | .....                | [1680] |
| #L1MdFanc_II | .....C..... | .....      | .....      | T.....    | T.....     | T.....     | AG.....    | A.....H.....Y.....   | [1680] |
| #L1MdMus_II  | .....T..... | .....      | .....      | T.....    | T.....     | K.....     | AR.....    | A.....H.....         | [1680] |
| #L1MdV_II    | .....T..... | .....      | C.....     | T.....    | T.....     | T.....     | A.....     | A.....RB.....N.....  | [1680] |
| #L1Lx_I      | .....       | .....      | C.....     | T.....    | T.....     | T.....     | A.....     | A.....               | [1680] |
| #L1Lx_III    | .....A..... | .....      | C.....     | T.....    | T.....     | VN.C.....  | A.A.....   | A.....C.....N.A..... | [1680] |
| #L1Lx_II     | .....W..... | .....      | C.....     | T.....    | T.....     | .....      | A.A.....   | A.....C.....         | [1680] |
| #L1Lx_IV     | .....A..... | .....      | C.....     | T.....    | T.....     | .....      | A.A.....   | A.....C.....         | [1680] |
| #L1MdV_III   | .....T..... | .....      | C.....     | T.....    | T.....     | .....      | A.A.....   | A.....C.....         | [1680] |

|              |             |            |            |            |             |               |            |           |        |        |
|--------------|-------------|------------|------------|------------|-------------|---------------|------------|-----------|--------|--------|
| #L1MdA_I     | AGCATACATT  | GCACCTCACA | CAATAATAGT | GGGAGACTTC | AACACACCAC  | TTTCTTCAAA    | GGACAGATCG | TGGAACAGA | [1760] |        |
| #L1MdA_II    | .....       | .....      | .....      | .....      | .....       | .....D        | .....      | .....     | [1760] |        |
| #L1MdA_III   | ...C.....   | .....      | .....      | .....      | .....       | .....A...T    | .....      | .....     | [1760] |        |
| #L1MdA_IV    | ...C.....   | .....      | .....      | .....      | .....       | .....A...T    | R.....     | .....     | [1760] |        |
| #L1MdGf_I    | ...C.....   | .....      | .....      | .....C     | .....       | .....A...T    | .....      | .....     | [1760] |        |
| #L1MdGf_II   | ...C.G..... | .....      | .....      | .....      | .....       | .....A...T    | .....      | .....     | [1760] |        |
| #L1MdTf_I    | ...C.....   | .....G     | .....      | .....      | .....       | .....AC...T   | .....A     | .....     | [1760] |        |
| #L1MdTf_II   | ...C.....   | .....G     | .....      | .....      | .....       | .....AC...T   | .....A     | .....     | [1760] |        |
| #L1MdTf_III  | ...C.....   | .....      | .....      | .....      | .....       | .....AC...T   | .....A     | .....     | [1760] |        |
| #L1MdA_V     | ...C.....   | .....      | .....      | .....      | .....       | .....A...T    | .....      | .....     | [1760] |        |
| #L1MdA_VI    | ...C.Y..... | .....      | .....      | .....      | .....       | .....A...T    | .....      | .....     | [1760] |        |
| #L1MdF_V     | ...C.....   | .....      | .....      | .....      | .....       | .....A...T    | .....      | .....     | [1760] |        |
| #L1MdF_IV    | ...C.....   | .....      | .....      | .....      | .....       | .....A...T    | .....      | .....     | [1760] |        |
| #L1MdF_I     | ...C.....   | .....      | .....      | .....      | .....       | .....AC...T   | .....A     | .....     | [1760] |        |
| #L1MdF_II    | ...C.....   | .....      | .....      | .....      | .....       | .....AC...T   | .....A     | .....     | [1760] |        |
| #L1MdF_III   | ...C.....   | .....      | .....      | .....      | .....       | .....AC...T   | .....A     | .....     | [1760] |        |
| #L1MdN_I     | ...C.....   | .....      | .....      | .....      | .....       | .....A...T    | .....      | .....     | [1760] |        |
| #L1MdA_VII   | ...C.....   | .....      | .....      | .....      | .....       | .....A...T    | .....      | .....     | [1760] |        |
| #L1MdMus_I   | ...C.....   | .....      | .....      | .....      | .....C      | .....C.AC...T | .....C     | .....     | [1760] |        |
| #L1MdFanc_I  | ...C.....   | .....      | .....      | .....      | .....C      | .....C.AC...T | .....C     | .....     | [1760] |        |
| #L1MdV_I     | ...C.....   | .....      | .....      | .....      | .....C      | .....Y.A...T  | .....      | .....     | [1760] |        |
| #L1MdFanc_II | ...C.....   | .....      | .....      | .....      | .....C      | .....C.A...T  | .....C     | .....     | [1760] |        |
| #L1MdMus_II  | ...C.Y..... | .....Y     | .....      | .....H     | .....C      | .....C.A...T  | .....C     | .....     | [1760] |        |
| #L1MdV_II    | ...C.....   | .....R     | .....      | .....      | .....C      | .....C.A...T  | .....H     | .....     | [1760] |        |
| #L1Lx_I      | .N.C.....   | .....B...G | .....      | .....      | .....NC     | .....C.A...T  | .....H     | .....     | [1760] |        |
| #L1Lx_III    | ...C.....   | .....      | .....T     | .....G     | .....NC     | .....C.A...T  | .....NA    | .....G    | .....C | [1760] |
| #L1Lx_II     | ...C...N    | .....D     | .....      | .....N.V.N | .....H.NC.H | .....C.AN...T | .....D...A | .....     | [1760] |        |
| #L1Lx_IV     | ...C.....   | .....      | .....      | .....      | .....C      | .....C.A...T  | .....A     | .....C    | [1760] |        |
| #L1MdV_III   | ...C.....   | .....R.Y.C | .....      | .....T     | .....C      | .....C.AG...T | .....R...A | .....     | [1760] |        |

|              |             |            |            |            |            |            |            |            |        |        |
|--------------|-------------|------------|------------|------------|------------|------------|------------|------------|--------|--------|
| #L1MdA_I     | AACATAACAG  | GGACACAGTG | AAACTAACAG | AAGTTATGAA | ACAAATGGAC | CTGACAGATA | TCTACAGAAC | ATTTTATCTT | [1840] |        |
| #L1MdA_II    | .....       | .....      | .....      | .....      | .....      | .....      | .....      | .....      | [1840] |        |
| #L1MdA_III   | .....       | .....      | .....      | .....      | .....      | .....      | .....      | .....      | [1840] |        |
| #L1MdA_IV    | .....       | .....      | .....      | .....      | .....      | T.A.....   | .....      | .....      | [1840] |        |
| #L1MdGf_I    | .....       | .....      | .....      | .....      | .....      | .....      | .....T     | .....A     | [1840] |        |
| #L1MdGf_II   | .....       | .....      | .....      | .....      | .....      | .....      | .....      | .....      | [1840] |        |
| #L1MdTf_I    | .....C..... | .....      | .....G     | .....      | .....T     | .....      | .....      | .....WC    | [1840] |        |
| #L1MdTf_II   | .....C..... | .....      | .....G     | .....      | .....T     | .....      | .....      | .....      | [1840] |        |
| #L1MdTf_III  | .....C..... | .....      | .....G     | .....      | .....T     | .....      | .....      | .....      | [1840] |        |
| #L1MdA_V     | .....       | .....      | .....      | .....      | .....T     | .....      | .....      | .....      | [1840] |        |
| #L1MdA_VI    | .....       | .....      | .....K     | .....      | .....T     | T.A.....   | .....      | .....      | [1840] |        |
| #L1MdF_V     | .....       | .....      | .....      | .....      | .....T     | T.A.....   | .....      | .....      | [1840] |        |
| #L1MdF_IV    | .....       | .....      | .....      | .....      | .....T     | T.A.....   | .....      | .....      | [1840] |        |
| #L1MdF_I     | .....       | .....      | .....G     | .....      | .....T     | T.A.....   | .....      | .....      | [1840] |        |
| #L1MdF_II    | .....       | .....      | .....K     | .....      | .....T     | .....      | .....      | .....      | [1840] |        |
| #L1MdF_III   | .....       | .....      | .....      | .....      | .....T     | .....      | .....      | .....      | [1840] |        |
| #L1MdN_I     | .....       | .....      | .....      | .....      | .....T     | .....      | .....      | .....      | [1840] |        |
| #L1MdA_VII   | .....       | .....      | .....      | .....      | .....T     | T.A.....   | .....      | .....      | [1840] |        |
| #L1MdMus_I   | .....A..... | .....TG    | .....C     | .....      | .....T     | T.A.....   | .....      | .....      | [1840] |        |
| #L1MdFanc_I  | .....A..... | .....TG    | .....C     | .....      | .....T     | T.A.T..... | .....      | .....      | [1840] |        |
| #L1MdV_I     | .....D..... | .....      | .....      | .....      | .....T     | T.A.....   | .....      | .....      | [1840] |        |
| #L1MdFanc_II | .....A..... | .....T     | .....      | .....      | .....T     | T.A.....   | .....      | .....      | [1840] |        |
| #L1MdMus_II  | .....A..... | .....B     | .....      | .....      | .....V     | .....T     | T.A.....   | .....H     | [1840] |        |
| #L1MdV_II    | .....A..... | .....      | .....      | .....      | .....T     | T.A.....   | .....T     | .....Y     | [1840] |        |
| #L1Lx_I      | .....A..... | .....      | .....      | .....      | .....T     | T.A.....   | .....T     | .....      | [1840] |        |
| #L1Lx_III    | .....A..... | .....      | .....W.G   | .....C     | .....T     | T.A.H.B    | .....VT    | .....C     | [1840] |        |
| #L1Lx_II     | .....A..... | .....      | .....      | .....      | .....T     | T.A.....   | .....B     | .....H     | [1840] |        |
| #L1Lx_IV     | .....A..... | .....      | .....R     | .....C     | .....T     | T.A.....   | .....T     | .....C     | [1840] |        |
| #L1MdV_III   | .....A..... | .....      | .....      | .....      | .....C     | .....T     | A...R...T  | .....T     | .....C | [1840] |

|              |             |            |            |            |            |            |            |            |        |        |        |
|--------------|-------------|------------|------------|------------|------------|------------|------------|------------|--------|--------|--------|
| #L1MdA_I     | AAAACAAAAG  | GATATACCTT | CTTCTCAGCA | CCTCACGGGA | CCTTCTCCAA | AATTGACCAT | ATAATTGGTC | ACAAAACAGG | [1920] |        |        |
| #L1MdA_II    | .....       | .....      | .....      | .....      | .....      | .....      | .....      | .....      | [1920] |        |        |
| #L1MdA_III   | .....       | .....      | .....      | .....      | .....      | .....      | .....      | .....      | [1920] |        |        |
| #L1MdA_IV    | .....       | .....      | .....      | .....      | .....      | .....      | .....      | .....Y     | [1920] |        |        |
| #L1MdGf_I    | .....       | .....      | .....      | .....      | .....G     | .....      | .....      | .....T.A   | [1920] |        |        |
| #L1MdGf_II   | .....       | .....      | .....      | .....      | .....      | .....      | .....      | .....      | [1920] |        |        |
| #L1MdTf_I    | .....       | .....      | .....      | .....      | .....T.T   | .....      | .....C     | .....A     | .....T | [1920] |        |
| #L1MdTf_II   | .....       | .....      | .....      | .....      | .....T.T   | .....      | .....C     | .....A     | .....T | [1920] |        |
| #L1MdTf_III  | .....       | .....      | .....      | .....      | .....T.T   | .....      | .....C     | .....A     | .....  | [1920] |        |
| #L1MdA_V     | .....       | .....      | .....      | .....      | .....      | .....      | .....      | .....      | [1920] |        |        |
| #L1MdA_VI    | .....       | .....      | .....      | .....      | .....T.T   | .....      | .....      | .....      | [1920] |        |        |
| #L1MdF_V     | .....       | .....      | .....      | .....      | .....T.T   | .....      | .....Y     | .....      | [1920] |        |        |
| #L1MdF_IV    | .....       | .....      | .....      | .....      | .....T.T   | .....      | .....      | .....      | [1920] |        |        |
| #L1MdF_I     | .....       | .....      | .....      | .....      | .....T.T   | .....T     | .....C     | .....      | .....A | [1920] |        |
| #L1MdF_II    | .....       | .....      | .....      | .....      | .....T.T   | .....      | .....C     | .....A     | .....  | [1920] |        |
| #L1MdF_III   | .....       | .....      | .....      | .....      | .....T.T   | .....      | .....C     | .....      | .....A | [1920] |        |
| #L1MdN_I     | .....       | .....      | .....      | .....      | .....      | .....      | .....      | .....Y     | [1920] |        |        |
| #L1MdA_VII   | .....       | .....      | .....      | .....      | .....      | .....      | .....      | .....      | [1920] |        |        |
| #L1MdMus_I   | .....       | .....      | .....      | .....      | .....T.T   | .....C     | .....      | .....      | [1920] |        |        |
| #L1MdFanc_I  | .....       | .....      | .....G     | .....A     | .....T.T   | .....C     | .....      | .....      | [1920] |        |        |
| #L1MdV_I     | .....       | .....      | .....      | .....      | .....T.T   | .....      | .....      | .....      | [1920] |        |        |
| #L1MdFanc_II | .....       | .....      | .....      | .....      | .....T.T   | .....      | .....      | .....      | [1920] |        |        |
| #L1MdMus_II  | .....       | .....      | .....      | .....      | .....T.Y   | .....      | .....Y.C   | .....      | .....H | [1920] |        |
| #L1MdV_II    | .....       | .....      | .....      | .....      | .....T.T   | .....      | .....Y     | .....C     | .....H | [1920] |        |
| #L1Lx_I      | .....       | .....      | .....      | .....      | .....T.T   | .....Y     | .....      | .....H.YC  | .....N | [1920] |        |
| #L1Lx_III    | .....T..... | .....A     | .....      | .....T.T   | .....      | .....Y     | .....G     | .....C     | .....T | .....A | [1920] |
| #L1Lx_II     | .....       | .....A     | .....      | .....      | .....      | .....      | .....      | .....C     | .....  | [1920] |        |
| #L1Lx_IV     | .....D..... | .....A     | .....      | .....      | .....T.T   | .....      | .....Y     | .....C     | .....  | .....A | [1920] |
| #L1MdV_III   | .....G..... | .....A     | .....Y     | .....      | .....T.T   | .....      | .....Y     | .....      | .....B | [1920] |        |



|              |            |            |            |            |            |            |            |            |        |         |        |        |         |        |        |
|--------------|------------|------------|------------|------------|------------|------------|------------|------------|--------|---------|--------|--------|---------|--------|--------|
| #L1MdA_I     | CCTCAATAGA | TACAAAAATA | TTGAAATTGT | CCCATGTATC | CTATCAGACC | ACCATGGCCT | AAGACTGATC | TTCAATAACA | [2000] |         |        |        |         |        |        |
| #L1MdA_II    | .....H     | .....      | .....      | .....      | .....      | .....      | .....      | .....      | [2000] |         |        |        |         |        |        |
| #L1MdA_III   | .....C     | .....      | .....      | .....      | .....      | .....      | .....      | .....      | [2000] |         |        |        |         |        |        |
| #L1MdA_IV    | .....C     | .....      | .....      | .....Y     | .....      | .....A     | .....G     | .....      | [2000] |         |        |        |         |        |        |
| #L1MdGf_I    | .....C     | .....      | .....      | .....      | .....      | .....      | .....      | .....      | [2000] |         |        |        |         |        |        |
| #L1MdGf_II   | .....C     | .....      | .....      | .....      | .....      | .....      | .....      | .....      | [2000] |         |        |        |         |        |        |
| #L1MdTf_I    | .....C     | .....T     | .....      | .....      | .....T     | .....CA    | .....G     | .....      | [2000] |         |        |        |         |        |        |
| #L1MdTf_II   | .....C     | .....T     | .....      | .....      | .....T     | .....CA    | .....G     | .....      | [2000] |         |        |        |         |        |        |
| #L1MdTf_III  | .....C     | .....T     | .....      | .....      | .....T     | .....CA    | .....G     | .....      | [2000] |         |        |        |         |        |        |
| #L1MdA_V     | .....C     | .....      | .....      | .....      | .....      | .....      | .....G     | .....      | [2000] |         |        |        |         |        |        |
| #L1MdA_VI    | .....C     | .....      | .....C     | .....C     | .....      | .....A     | .....G     | .....      | [2000] |         |        |        |         |        |        |
| #L1MdF_V     | .....C     | .....      | .....      | .....C     | .....T     | .....A     | .....G     | .....      | [2000] |         |        |        |         |        |        |
| #L1MdF_IV    | .....C     | .....      | .....      | .....C     | .....T     | .....A     | .....G     | .....      | [2000] |         |        |        |         |        |        |
| #L1MdF_I     | .....C     | .....T     | .....      | .....C     | .....Y     | .....A     | .....G     | .....      | [2000] |         |        |        |         |        |        |
| #L1MdF_II    | .....C     | .....W     | .....      | .....C     | .....T     | .....CA    | .....G     | .....      | [2000] |         |        |        |         |        |        |
| #L1MdF_III   | .....C     | .....T     | .....      | .....C     | .....T     | .....A     | .....G     | .....      | [2000] |         |        |        |         |        |        |
| #L1MdN_I     | .....C     | .....      | .....      | .....      | .....      | .....      | .....G     | .....      | [2000] |         |        |        |         |        |        |
| #L1MdA_VII   | .....C     | .....      | .....      | .....C     | .....      | .....A     | .....G     | .....      | [2000] |         |        |        |         |        |        |
| #L1MdMus_I   | .....C     | .....      | .....A     | .....C     | .....T     | .....CA    | .....G     | .....      | [2000] |         |        |        |         |        |        |
| #L1MdFanc_I  | .....M     | .....C     | .....      | .....A     | .....C     | .....T     | .....T     | .....CA    | .....G | [2000]  |        |        |         |        |        |
| #L1MdV_I     | .....C     | .....      | .....      | .....C     | .....T     | .....A     | .....G     | .....      | [2000] |         |        |        |         |        |        |
| #L1MdFanc_II | .....C     | .....      | .....A     | .....C     | .....T     | .....CA    | .....G     | .....      | [2000] |         |        |        |         |        |        |
| #L1MdMus_II  | .....C     | .....      | .....HA    | .....C     | .....T     | .....CA    | .....G     | .....      | [2000] |         |        |        |         |        |        |
| #L1MdV_II    | .....VC    | .....      | .....AA    | .....C     | .....Y     | .....T     | .....CA    | .....G     | .....  | [2000]  |        |        |         |        |        |
| #L1Lx_I      | .....C     | .....      | .....AA    | .....C     | .....T     | .....CA    | .....G     | .....      | [2000] |         |        |        |         |        |        |
| #L1Lx_III    | .....C     | .....T     | .....G     | .....G     | .....AA    | .....RCC   | .....T     | .....T     | .....R | .....AT | .....G | .....G | .....G  | .....G | [2000] |
| #L1Lx_II     | .....C     | .....      | .....G     | .....G     | .....AA    | .....C     | .....T     | .....N     | .....C | .....A  | .....G | .....G | .....   | [2000] |        |
| #L1Lx_IV     | .....C     | .....N     | .....T     | .....G     | .....G     | .....AA    | .....CM    | .....T     | .....G | .....AT | .....G | .....G | .....G  | .....G | [2000] |
| #L1MdV_III   | .....C     | .....      | .....G     | .....G     | .....AA    | .....C     | .....H     | .....T     | .....A | .....G  | .....G | .....A | .....TC | [2000] |        |
|              |            |            |            |            |            |            |            |            |        |         |        |        |         |        |        |
| #L1MdA_I     | ACATAAATAA | TGGAAGCCA  | ACATTACCGT | GGAAACTGAA | TAACACTCTT | CTCAATGATA | CCTTGGTCAA | GGAAGGAATA | [2080] |         |        |        |         |        |        |
| #L1MdA_II    | .....      | .....      | .....      | .....      | .....      | .....      | .....      | .....      | [2080] |         |        |        |         |        |        |
| #L1MdA_III   | .....      | .....      | .....      | .....      | .....      | .....C     | .....      | .....      | [2080] |         |        |        |         |        |        |
| #L1MdA_IV    | .....      | .....      | .....W     | .....      | .....Y     | .....      | .....      | .....W     | [2080] |         |        |        |         |        |        |
| #L1MdGf_I    | .....T     | .....G     | .....      | .....      | .....C     | .....      | .....      | .....      | [2080] |         |        |        |         |        |        |
| #L1MdGf_II   | .....      | .....      | .....D     | .....      | .....C     | .....      | .....      | .....      | [2080] |         |        |        |         |        |        |
| #L1MdTf_I    | .....A     | .....CA    | .....A     | .....      | .....C     | .....      | .....      | .....      | [2080] |         |        |        |         |        |        |
| #L1MdTf_II   | .....A     | .....CA    | .....A     | .....      | .....C     | .....      | .....      | .....      | [2080] |         |        |        |         |        |        |
| #L1MdTf_III  | .....A     | .....A     | .....CA    | .....C     | .....      | .....      | .....      | .....      | [2080] |         |        |        |         |        |        |
| #L1MdA_V     | .....      | .....      | .....      | .....      | .....C     | .....      | .....      | .....      | [2080] |         |        |        |         |        |        |
| #L1MdA_VI    | .....      | .....      | .....A     | .....      | .....C     | .....      | .....      | .....      | [2080] |         |        |        |         |        |        |
| #L1MdF_V     | .....      | .....A     | .....      | .....      | .....C     | .....      | .....      | .....      | [2080] |         |        |        |         |        |        |
| #L1MdF_IV    | .....      | .....A     | .....      | .....      | .....C     | .....      | .....      | .....      | [2080] |         |        |        |         |        |        |
| #L1MdF_I     | .....A     | .....A     | .....      | .....      | .....C     | .....      | .....      | .....      | [2080] |         |        |        |         |        |        |
| #L1MdF_II    | .....A     | .....A     | .....      | .....      | .....C     | .....      | .....      | .....      | [2080] |         |        |        |         |        |        |
| #L1MdF_III   | .....A     | .....A     | .....      | .....      | .....C     | .....      | .....      | .....      | [2080] |         |        |        |         |        |        |
| #L1MdN_I     | .....      | .....      | .....      | .....      | .....C     | .....      | .....      | .....      | [2080] |         |        |        |         |        |        |
| #L1MdA_VII   | .....      | .....      | .....      | .....      | .....C     | .....      | .....      | .....      | [2080] |         |        |        |         |        |        |
| #L1MdMus_I   | .....G     | .....A     | .....      | .....      | .....C     | .....A     | .....      | .....A     | [2080] |         |        |        |         |        |        |
| #L1MdFanc_I  | .....D     | .....A     | .....      | .....      | .....C     | .....A     | .....T     | .....T     | .....A | [2080]  |        |        |         |        |        |
| #L1MdV_I     | .....      | .....AV    | .....      | .....      | .....C     | .....C     | .....      | .....A     | [2080] |         |        |        |         |        |        |
| #L1MdFanc_II | .....      | .....A     | .....      | .....      | .....G     | .....A     | .....A     | .....A     | [2080] |         |        |        |         |        |        |
| #L1MdMus_II  | .....R     | .....A     | .....      | .....      | .....S     | .....N     | .....A     | .....M     | .....A | [2080]  |        |        |         |        |        |
| #L1MdV_II    | .....      | .....A     | .....R     | .....C     | .....N     | .....G     | .....V     | .....A     | .....A | [2080]  |        |        |         |        |        |
| #L1Lx_I      | .....      | .....CA    | .....A     | .....T     | .....G     | .....C     | .....A     | .....A     | .....C | .....A  | [2080] |        |         |        |        |
| #L1Lx_III    | .....A     | .....C     | .....CA    | .....H     | .....A     | .....A     | .....G     | .....C     | .....G | .....A  | .....A | .....N | .....A  | .....K | [2080] |
| #L1Lx_II     | .....W     | .....C     | .....A     | .....H     | .....A     | .....A     | .....G     | .....C     | .....G | .....A  | .....A | .....N | .....H  | .....A | [2080] |
| #L1Lx_IV     | .....A     | .....C     | .....CA    | .....A     | .....A     | .....G     | .....C     | .....G     | .....A | .....A  | .....A | .....A | .....A  | [2080] |        |
| #L1MdV_III   | .....A     | .....Y     | .....C     | .....D     | .....AC    | .....AT    | .....A     | .....G     | .....C | .....TG | .....A | .....A | .....A  | [2080] |        |
|              |            |            |            |            |            |            |            |            |        |         |        |        |         |        |        |
| #L1MdA_I     | AAGAAAGAAA | TTAAAGACTT | TTTAGAGTTT | AATGAAAATG | AAGCCACAAC | GTACCCAAAC | CTATGGGACA | CAATGAAAGC | [2160] |         |        |        |         |        |        |
| #L1MdA_II    | .....      | .....      | .....      | .....      | .....      | .....      | .....      | .....      | [2160] |         |        |        |         |        |        |
| #L1MdA_III   | .....      | .....      | .....      | .....      | .....      | .....      | .....T     | .....      | [2160] |         |        |        |         |        |        |
| #L1MdA_IV    | .....      | .....      | .....      | .....      | .....      | .....A     | .....      | .....      | [2160] |         |        |        |         |        |        |
| #L1MdGf_I    | .....      | .....      | .....      | .....      | .....      | .....      | .....T     | .....      | [2160] |         |        |        |         |        |        |
| #L1MdGf_II   | .....      | .....      | .....      | .....      | .....      | .....      | .....      | .....      | [2160] |         |        |        |         |        |        |
| #L1MdTf_I    | .....      | .....      | .....      | .....      | .....      | .....      | .....T     | .....      | [2160] |         |        |        |         |        |        |
| #L1MdTf_II   | .....      | .....      | .....      | .....      | .....      | .....      | .....T     | .....      | [2160] |         |        |        |         |        |        |
| #L1MdTf_III  | .....      | .....      | .....      | .....      | .....      | .....      | .....T     | .....      | [2160] |         |        |        |         |        |        |
| #L1MdA_V     | .....      | .....      | .....      | .....      | .....      | .....A     | .....      | .....      | [2160] |         |        |        |         |        |        |
| #L1MdA_VI    | .....      | .....      | .....      | .....      | .....      | .....A     | .....T     | .....W     | [2160] |         |        |        |         |        |        |
| #L1MdF_V     | .....      | .....      | .....      | .....      | .....      | .....A     | .....T     | .....      | [2160] |         |        |        |         |        |        |
| #L1MdF_IV    | .....      | .....      | .....      | .....      | .....      | .....A     | .....T     | .....      | [2160] |         |        |        |         |        |        |
| #L1MdF_I     | .....      | .....G     | .....G     | .....      | .....      | .....A     | .....T     | .....      | [2160] |         |        |        |         |        |        |
| #L1MdF_II    | .....      | .....G     | .....C     | .....C     | .....      | .....TT    | .....A     | .....T     | [2160] |         |        |        |         |        |        |
| #L1MdF_III   | .....      | .....G     | .....G     | .....      | .....      | .....A     | .....T     | .....      | [2160] |         |        |        |         |        |        |
| #L1MdN_I     | .....      | .....      | .....      | .....      | .....      | .....A     | .....      | .....      | [2160] |         |        |        |         |        |        |
| #L1MdA_VII   | .....      | .....      | .....      | .....      | .....      | .....A     | .....      | .....      | [2160] |         |        |        |         |        |        |
| #L1MdMus_I   | .....      | .....      | .....      | .....      | .....      | .....A     | .....T     | .....      | [2160] |         |        |        |         |        |        |
| #L1MdFanc_I  | .....      | .....      | .....      | .....      | .....      | .....A     | .....T     | .....G     | [2160] |         |        |        |         |        |        |
| #L1MdV_I     | .....      | .....      | .....      | .....      | .....      | .....A     | .....T     | .....      | [2160] |         |        |        |         |        |        |
| #L1MdFanc_II | .....R     | .....      | .....      | .....      | .....      | .....A     | .....T     | .....      | [2160] |         |        |        |         |        |        |
| #L1MdMus_II  | .....C     | .....      | .....      | .....      | .....      | .....A     | .....T     | .....      | [2160] |         |        |        |         |        |        |
| #L1MdV_II    | .....      | .....      | .....      | .....      | .....      | .....A     | .....N     | .....T     | [2160] |         |        |        |         |        |        |
| #L1Lx_I      | .....      | .....      | .....      | .....      | .....      | .....A     | .....T     | .....      | [2160] |         |        |        |         |        |        |
| #L1Lx_III    | .....      | .....      | .....A     | .....      | .....      | .....RT    | .....A     | .....Y     | .....T | [2160]  |        |        |         |        |        |
| #L1Lx_II     | .....      | .....      | .....V     | .....      | .....      | .....GN    | .....A     | .....T     | [2160] |         |        |        |         |        |        |
| #L1Lx_IV     | .....      | .....R     | .....      | .....A     | .....      | .....GY    | .....A     | .....T     | [2160] |         |        |        |         |        |        |
| #L1MdV_III   | .....      | .....      | .....A     | .....      | .....      | .....A     | .....T     | .....A     | .....T | [2160]  |        |        |         |        |        |

|              |            |            |            |            |            |            |            |            |        |        |        |        |        |        |
|--------------|------------|------------|------------|------------|------------|------------|------------|------------|--------|--------|--------|--------|--------|--------|
| #L1MdA_I     | ATTTCTAAGA | GGGAAACTCA | TAGCGCTGAG | TGCTTCCAAG | AAGAAACGGG | AGACAGCACA | TACTAGCAGC | TTGACAACAC | [2240] |        |        |        |        |        |
| #L1MdA_II    |            |            | T          |            |            | V          |            |            | [2240] |        |        |        |        |        |
| #L1MdA_III   |            |            | T          |            |            | G          |            |            | [2240] |        |        |        |        |        |
| #L1MdA_IV    |            |            | T          |            | T          | G          | C          |            | [2240] |        |        |        |        |        |
| #L1MdGf_I    |            |            | T          | A          |            | G          |            |            | [2240] |        |        |        |        |        |
| #L1MdGf_II   |            |            | T          |            |            | G          |            |            | [2240] |        |        |        |        |        |
| #L1MdTf_I    |            |            | TA         | T          | A          | G          |            |            | [2240] |        |        |        |        |        |
| #L1MdTf_II   |            |            | TA         | T          | A          | G          |            |            | [2240] |        |        |        |        |        |
| #L1MdTf_III  |            |            | T          |            | T          | G          |            |            | [2240] |        |        |        |        |        |
| #L1MdA_V     |            |            | T          |            |            | G          |            |            | [2240] |        |        |        |        |        |
| #L1MdA_VI    |            |            | T          | A          | TA         | G          | C          |            | [2240] |        |        |        |        |        |
| #L1MdF_V     | A          |            | T          | A          | TA         | G          | C          |            | [2240] |        |        |        |        |        |
| #L1MdF_IV    | A          |            | T          | A          | TA         | G          | C          |            | [2240] |        |        |        |        |        |
| #L1MdF_I     | C          | A          | T          | A          | TA         | G          | C          | T          | [2240] |        |        |        |        |        |
| #L1MdF_II    | A          |            | T          | A          | TA         | G          | T          | C          | T      | [2240] |        |        |        |        |
| #L1MdF_III   | A          |            | T          | A          | TA         | G          | C          | T          | [2240] |        |        |        |        |        |
| #L1MdN_I     |            |            | T          |            |            | G          |            |            | [2240] |        |        |        |        |        |
| #L1MdA_VII   |            |            | T          | A          | TA         | G          | C          |            | [2240] |        |        |        |        |        |
| #L1MdMus_I   | G          | C          | A          | C          | A          | TA         | G          | T          | C      | G      | [2240] |        |        |        |
| #L1MdFanc_I  | G          | C          | A          | C          | A          | TA         | G          | T          | C      | G      | [2240] |        |        |        |
| #L1MdV_I     | Y          | A          | T          | A          | TA         | G          | H          | C          |        | G      | [2240] |        |        |        |
| #L1MdFanc_II | G          | C          | A          | T          | G          | A          | TA         | G          | T      | C      | [2240] |        |        |        |
| #L1MdMus_II  | C          | A          | T          | A          | TA         | G          | R          | T          | C      | Y      | G      | [2240] |        |        |
| #L1MdV_II    | G          | C          | A          | T          | A          | D          | T          | NG         | T      | C      | G      | [2240] |        |        |
| #L1Lx_I      | B          | C          | A          | T          | A          | T          | G          | D          | T      | Y      | H      | G      | [2240] |        |
| #L1Lx_III    | G          | G          | A          | T          | A          | T          | G          | T          | C      | NT     | A      | G      | [2240] |        |
| #L1Lx_II     | G          | N          | A          | T          | A          | T          | G          | T          | C      |        | R      | G      | [2240] |        |
| #L1Lx_IV     | G          | G          | A          | T          | A          | T          | G          | T          | C      |        | A      | G      | [2240] |        |
| #L1MdV_III   | G          | GS         | A          | T          | A          | T          | D          | G          | VYTT   | C      | H      | G      | G      | [2240] |

|              |            |            |            |            |            |            |             |            |        |        |    |        |
|--------------|------------|------------|------------|------------|------------|------------|-------------|------------|--------|--------|----|--------|
| #L1MdA_I     | ATCTAAAAGC | CCTAGAAAAA | AAGGAAGCAA | ATTCACCCAA | GAGGAGTAGA | CGGCAGGAAA | TAATCAAACCT | CAGGGGTGAA | [2320] |        |    |        |
| #L1MdA_II    |            |            |            |            |            |            |             |            | [2320] |        |    |        |
| #L1MdA_III   |            | T          |            |            |            |            |             |            | [2320] |        |    |        |
| #L1MdA_IV    |            | T          |            |            |            |            |             |            | [2320] |        |    |        |
| #L1MdGf_I    |            | T          |            |            |            |            |             |            | [2320] |        |    |        |
| #L1MdGf_II   |            | T          |            |            |            |            |             |            | [2320] |        |    |        |
| #L1MdTf_I    |            | T          |            |            |            |            |             |            | [2320] |        |    |        |
| #L1MdTf_II   |            | T          |            |            |            |            |             |            | [2320] |        |    |        |
| #L1MdTf_III  |            | T          |            |            |            |            |             |            | [2320] |        |    |        |
| #L1MdA_V     |            | T          |            |            |            |            |             |            | [2320] |        |    |        |
| #L1MdA_VI    | C          | T          |            |            |            |            |             | C          | [2320] |        |    |        |
| #L1MdF_V     | C          | T          | C          |            |            |            |             | C          | [2320] |        |    |        |
| #L1MdF_IV    | C          | T          | C          |            |            |            |             | C          | [2320] |        |    |        |
| #L1MdF_I     | C          | G          | T          | G          |            | A          |             |            | [2320] |        |    |        |
| #L1MdF_II    | C          | T          | M          |            |            |            |             | C          | [2320] |        |    |        |
| #L1MdF_III   | C          | T          | C          |            |            |            |             | Y          | [2320] |        |    |        |
| #L1MdN_I     |            | T          |            |            |            |            |             |            | [2320] |        |    |        |
| #L1MdA_VII   |            | W          | T          | M          |            |            |             |            | [2320] |        |    |        |
| #L1MdMus_I   | C          | G          | T          | CG         |            |            |             | T          | CD     | [2320] |    |        |
| #L1MdFanc_I  | C          | G          | T          | CT         |            |            |             | C          | [2320] |        |    |        |
| #L1MdV_I     | C          | T          | C          |            |            |            |             | NC         | [2320] |        |    |        |
| #L1MdFanc_II | C          | T          | C          |            |            |            | H           | C          | [2320] |        |    |        |
| #L1MdMus_II  | C          | T          | C          | R          |            |            |             | C          | [2320] |        |    |        |
| #L1MdV_II    | H          | V          | T          | C          | R          | D          |             | C          | [2320] |        |    |        |
| #L1Lx_I      | C          | T          | C          |            |            |            |             | C          | [2320] |        |    |        |
| #L1Lx_III    | C          | G          | T          | C          | A          | A          |             | C          | [2320] |        |    |        |
| #L1Lx_II     | N          | D          | T          | R          | C          | A          | N           | AN         | D      | H      | DC | [2320] |
| #L1Lx_IV     | Y          | G          | T          | C          | A          | AB         |             | H          | H      | [2320] |    |        |
| #L1MdV_III   | C          | G          | T          | C          | A          | A          |             | C          | [2320] |        |    |        |

|              |            |           |            |            |            |            |            |            |        |        |        |   |   |        |
|--------------|------------|-----------|------------|------------|------------|------------|------------|------------|--------|--------|--------|---|---|--------|
| #L1MdA_I     | ATCAACCAAG | TGGAACAAG | AAGAACTATT | CAAAGAATTA | ACCAAACGAG | GAGTTGGTTC | TTTGAGAAAA | TCAACAAGAT | [2400] |        |        |   |   |        |
| #L1MdA_II    |            |           |            |            |            |            |            |            | [2400] |        |        |   |   |        |
| #L1MdA_III   |            |           |            |            |            |            |            |            | [2400] |        |        |   |   |        |
| #L1MdA_IV    |            |           |            |            |            |            |            |            | [2400] |        |        |   |   |        |
| #L1MdGf_I    | T          |           |            |            |            |            |            |            | [2400] |        |        |   |   |        |
| #L1MdGf_II   |            |           |            |            |            |            | R          |            | [2400] |        |        |   |   |        |
| #L1MdTf_I    |            |           |            |            |            |            |            |            | [2400] |        |        |   |   |        |
| #L1MdTf_II   |            |           |            |            |            |            |            |            | [2400] |        |        |   |   |        |
| #L1MdTf_III  |            |           |            |            |            |            |            |            | [2400] |        |        |   |   |        |
| #L1MdA_V     |            |           |            |            |            |            |            |            | [2400] |        |        |   |   |        |
| #L1MdA_VI    |            |           |            |            | C          | C          |            |            | [2400] |        |        |   |   |        |
| #L1MdF_V     |            |           |            |            | C          | C          |            |            | [2400] |        |        |   |   |        |
| #L1MdF_IV    |            |           |            |            | C          |            |            |            | [2400] |        |        |   |   |        |
| #L1MdF_I     |            |           |            |            | H          | W          | D          | Y          | [2400] |        |        |   |   |        |
| #L1MdF_II    |            |           |            |            | G          | C          | T          | C          | [2400] |        |        |   |   |        |
| #L1MdF_III   |            |           |            |            | C          | T          | C          |            | [2400] |        |        |   |   |        |
| #L1MdN_I     |            |           |            |            |            |            |            |            | [2400] |        |        |   |   |        |
| #L1MdA_VII   |            |           |            |            |            |            |            |            | [2400] |        |        |   |   |        |
| #L1MdMus_I   |            | A         |            |            | C          | C          | C          |            | [2400] |        |        |   |   |        |
| #L1MdFanc_I  |            | A         |            |            | C          | C          | C          |            | [2400] |        |        |   |   |        |
| #L1MdV_I     |            | A         |            |            | C          | C          | C          |            | [2400] |        |        |   |   |        |
| #L1MdFanc_II |            | A         | W          |            | C          | C          | C          |            | [2400] |        |        |   |   |        |
| #L1MdMus_II  |            | A         | W          |            | C          | C          | C          |            | [2400] |        |        |   |   |        |
| #L1MdV_II    |            | D         | A          | A          | C          | C          | Y          |            | [2400] |        |        |   |   |        |
| #L1Lx_I      |            | A         | A          | A          | C          | YC         | C          |            | [2400] |        |        |   |   |        |
| #L1Lx_III    |            | A         | A          | A          | C          | A          | C          | C          | [2400] |        |        |   |   |        |
| #L1Lx_II     | R          | A         | A          | D          | N          | A          | N          | C          | HN     | HC     | NC     | N | D | [2400] |
| #L1Lx_IV     |            | A         | A          | A          | A          | C          | C          | C          |        | [2400] |        |   |   |        |
| #L1MdV_III   |            | A         | A          | A          | A          | C          | A          | C          | C      |        | [2400] |   |   |        |

|              |             |             |                   |                               |              |              |              |               |        |
|--------------|-------------|-------------|-------------------|-------------------------------|--------------|--------------|--------------|---------------|--------|
| #L1MdA_I     | AGATAAACCC  | TTAGCTAGAC  | TCACTAAAGG        | GCACAGGGAC                    | AAAATCCTAA   | TTAACAAAAT   | CAGAAATGAA   | AAGGGAGACA    | [2480] |
| #L1MdA_II    | .....       | .....       | .....             | .....                         | .....        | .....        | .....        | .....         | [2480] |
| #L1MdA_III   | .....       | .....       | .....             | .....                         | .....        | .....        | .....        | .....         | [2480] |
| #L1MdA_IV    | .....       | .....       | .....G.....       | .....                         | .....        | .....        | .....        | .....         | [2480] |
| #L1MdGf_I    | .....       | .....       | .....G.....       | .....A.....                   | .....        | .....C.....  | .....        | .....         | [2480] |
| #L1MdGf_II   | .....       | .....       | .....R.....       | .....                         | .....        | .....        | .....        | .....         | [2480] |
| #L1MdTf_I    | .....       | .....       | .....             | .....                         | .....        | .....        | .....        | .....         | [2480] |
| #L1MdTf_II   | .....       | .....       | .....             | .....                         | .....        | .....        | .....        | .....         | [2480] |
| #L1MdTf_III  | .....       | .....       | .....G.....       | .....A.....                   | .....        | .....        | .....C.....  | .....         | [2480] |
| #L1MdA_V     | .....       | .....       | .....G.....       | .....                         | .....        | .....        | .....        | .....         | [2480] |
| #L1MdA_VI    | .....       | .....C..... | .....G.....       | .....                         | .....        | .....        | .....        | .....         | [2480] |
| #L1MdF_V     | .....       | .....C..... | .....G.....       | .....                         | .....        | .....GC..... | .....        | .....         | [2480] |
| #L1MdF_IV    | .....       | .....C..... | .....G.....       | .....                         | .....        | .....GC..... | .....        | .....         | [2480] |
| #L1MdF_I     | .....       | .....Y..... | .....G.....       | .....M.....                   | .....RM..... | .....        | .....        | .....         | [2480] |
| #L1MdF_II    | .....C..... | .....C..... | .....G.....       | .....A.....                   | .....GC..... | .....T.....  | .....        | .....         | [2480] |
| #L1MdF_III   | .....       | .....C..... | .....G.....       | .....A.....                   | .....GC..... | .....Y.....  | .....        | .....         | [2480] |
| #L1MdN_I     | .....       | .....       | .....G.....       | .....                         | .....        | .....C.....  | .....        | .....         | [2480] |
| #L1MdA_VII   | .....       | .....       | .....G.....       | .....                         | .....        | .....GC..... | .....        | .....         | [2480] |
| #L1MdMus_I   | .....       | .....C..... | .....A.....G..... | .....                         | .....        | .....GT..... | .....A.....  | .....         | [2480] |
| #L1MdFanc_I  | .....       | .....C..... | .....A.....G..... | .....                         | .....        | .....GT..... | .....A.....  | .....A.....   | [2480] |
| #L1MdV_I     | .....       | .....       | .....C.....       | .....G.....                   | .....        | .....GC..... | .....        | .....         | [2480] |
| #L1MdFanc_II | .....       | .....       | .....C.....       | .....A.....G.....             | .....        | .....GT..... | .....        | .....         | [2480] |
| #L1MdMus_II  | .....       | .....       | .....C.....       | .....M.....G.....             | .....        | .....GT..... | .....        | .....         | [2480] |
| #L1MdV_II    | .....       | H.....      | .....C.....       | .....A.....G.....             | .....        | .....GT..... | .....        | .....         | [2480] |
| #L1Lx_I      | .....       | .....       | .....C.....       | .....A.....G.....             | .....        | .....GT..... | .....Y.....  | .....         | [2480] |
| #L1Lx_III    | .....       | .....       | .....C.....       | .....A.....C.....G.....       | .....AN..... | .....GT..... | .....A.....  | .....Y.....   | [2480] |
| #L1Lx_II     | .....       | B.....      | .....C.....       | .....Y.....A.....C.....G..... | .....A.....  | .....GT..... | N.H.....     | Y.....D.....  | [2480] |
| #L1Lx_IV     | .....       | .....       | .....C.....       | .....A.....C.....G.....       | .....A.....  | .....GT..... | .....A.....  | .....D.T..... | [2480] |
| #L1MdV_III   | .....       | .....       | .....C.....       | .....A.....C.....G.....       | R.....       | .....A.....  | .....GT..... | .....A.....   | [2480] |

|              |            |             |             |                    |                |             |              |             |                                 |        |
|--------------|------------|-------------|-------------|--------------------|----------------|-------------|--------------|-------------|---------------------------------|--------|
| #L1MdA_I     | TAACAACAGA | TCCTGAAGAA  | ATCCAAAACA  | CCATCAGATC         | CTTCTACAAA     | AGGCTATACT  | CAACAAAACCT  | GGAAAACCTG  | [2560]                          |        |
| #L1MdA_II    | .....      | .....       | .....       | .....              | .....          | .....       | .....        | .....       | [2560]                          |        |
| #L1MdA_III   | .....      | .....       | .....       | .....              | .....          | .....Y..... | .....        | .....       | [2560]                          |        |
| #L1MdA_IV    | .....      | .....       | .....       | .....              | .....          | .....       | .....        | .....       | [2560]                          |        |
| #L1MdGf_I    | .....      | .....       | .....       | .....              | .....          | .....       | .....CT..... | .....       | [2560]                          |        |
| #L1MdGf_II   | .....      | .....       | .....       | .....              | .....          | .....       | .....        | .....       | [2560]                          |        |
| #L1MdTf_I    | .....      | .....       | .....       | .....              | .....          | .....       | .....        | .....       | [2560]                          |        |
| #L1MdTf_II   | .....      | .....       | .....       | .....              | .....          | .....       | .....        | .....       | [2560]                          |        |
| #L1MdTf_III  | .....      | .....       | .....       | .....              | .....          | .....       | .....        | .....       | [2560]                          |        |
| #L1MdA_V     | .....      | .....       | .....       | .....              | .....          | .....       | .....        | .....       | [2560]                          |        |
| #L1MdA_VI    | .....      | .....       | .....       | .....              | .....          | .....       | .....        | .....       | [2560]                          |        |
| #L1MdF_V     | .....      | .....       | .....       | .....              | .....          | .....       | .....        | .....       | [2560]                          |        |
| #L1MdF_IV    | .....      | .....       | .....       | .....              | .....          | .....       | .....        | .....       | [2560]                          |        |
| #L1MdF_I     | .....      | .....       | .....       | .....              | .....          | .....       | .....        | .....       | [2560]                          |        |
| #L1MdF_II    | .....      | .....Y..... | .....       | .....              | .....          | .....       | .....G.....  | .....       | [2560]                          |        |
| #L1MdF_III   | .....      | .....       | .....       | .....              | .....          | .....       | .....G.....  | .....       | [2560]                          |        |
| #L1MdN_I     | .....      | .....       | .....       | .....              | .....          | .....       | .....        | .....       | [2560]                          |        |
| #L1MdA_VII   | .....      | .....       | .....       | .....              | .....          | .....       | .....        | .....       | [2560]                          |        |
| #L1MdMus_I   | .....      | .....G..... | .....       | .....T.....        | .....          | .....A..... | .....        | .....       | [2560]                          |        |
| #L1MdFanc_I  | .....      | A.....      | .....G..... | .....              | .....T.....    | .....       | .....A.....  | .....A..... | [2560]                          |        |
| #L1MdV_I     | .....      | .....       | .....D..... | .....              | .....          | .....       | .....        | .....       | [2560]                          |        |
| #L1MdFanc_II | .....      | A.....      | .....G..... | .....              | .....T.....    | .....       | .....A.....  | .....       | [2560]                          |        |
| #L1MdMus_II  | .....      | S.....      | A.....      | .....G.....        | .....          | .....T..... | .....        | .....       | [2560]                          |        |
| #L1MdV_II    | .....      | AH.....     | .....G..... | .....              | .....A.....    | .....T..... | .....        | .....N..... | [2560]                          |        |
| #L1Lx_I      | .....      | AT.....     | .....G..... | .....              | .....V.....    | .....T..... | .....        | .....S..... | [2560]                          |        |
| #L1Lx_III    | .....      | AA.....     | .....G..... | .....              | .....Y.....    | .....A..... | .....        | .....C..... | M.....D.....T.....              | [2560] |
| #L1Lx_II     | N.....     | N.....      | AH.....     | .....NG.....       | .....NN.N..... | AD.....     | T.....       | .....       | A.....B.....CY.....Y.....Y..... | [2560] |
| #L1Lx_IV     | H.....     | .....       | AA.....     | .....G.....        | .....TA.....   | AW.....     | HA.....      | .....       | A.....N.....Y.....M.....T.....  | [2560] |
| #L1MdV_III   | .....      | .....       | AA.....     | .....C.....TG..... | .....TH.....   | .....A..... | T.....       | .....       | AH.....TT.....T.....T.....      | [2560] |

|              |            |            |            |             |             |              |             |                     |               |              |               |         |        |               |         |              |              |              |        |
|--------------|------------|------------|------------|-------------|-------------|--------------|-------------|---------------------|---------------|--------------|---------------|---------|--------|---------------|---------|--------------|--------------|--------------|--------|
| #L1MdA_I     | GACGAAATGG | ACAAATTTCT | GGACAGATAC | CAGGTACCAA  | AGTTGAATCA  | GGATCAAGTT   | GACCATCTAA  | ACAGTCCCAT          | [2640]        |              |               |         |        |               |         |              |              |              |        |
| #L1MdA_II    | .....      | .....      | .....      | .....       | .....       | .....        | .....       | .....               | [2640]        |              |               |         |        |               |         |              |              |              |        |
| #L1MdA_III   | .....      | .....      | .....      | .....       | .....R..... | .....        | .....       | .....               | [2640]        |              |               |         |        |               |         |              |              |              |        |
| #L1MdA_IV    | .....      | .....      | .....      | .....       | .....A..... | .....        | .....A..... | .....G.....         | [2640]        |              |               |         |        |               |         |              |              |              |        |
| #L1MdGf_I    | .....      | .....      | .....      | .....       | .....       | .....        | .....       | .....T.....         | [2640]        |              |               |         |        |               |         |              |              |              |        |
| #L1MdGf_II   | .....      | .....      | .....      | .....       | .....       | .....        | .....       | .....               | [2640]        |              |               |         |        |               |         |              |              |              |        |
| #L1MdTf_I    | .....      | .....      | .....      | .....       | .....       | .....        | .....       | .....T.....         | [2640]        |              |               |         |        |               |         |              |              |              |        |
| #L1MdTf_II   | .....      | .....      | .....      | .....       | .....       | .....        | .....       | .....T.....         | [2640]        |              |               |         |        |               |         |              |              |              |        |
| #L1MdTf_III  | .....      | .....      | .....      | .....       | .....       | .....        | .....       | .....T.....         | [2640]        |              |               |         |        |               |         |              |              |              |        |
| #L1MdA_V     | .....      | .....      | A.....     | .....       | .....       | .....A.....  | .....       | A.....G.....        | [2640]        |              |               |         |        |               |         |              |              |              |        |
| #L1MdA_VI    | .....      | .....      | A.....     | .....       | .....       | A.....Y..... | .....       | A.....G.....        | [2640]        |              |               |         |        |               |         |              |              |              |        |
| #L1MdF_V     | .....      | .....      | A.....     | .....       | .....       | A.....       | .....       | G.....A.....TG..... | [2640]        |              |               |         |        |               |         |              |              |              |        |
| #L1MdF_IV    | .....      | .....      | A.....     | .....       | .....       | A.....       | .....       | G.....A.....TG..... | [2640]        |              |               |         |        |               |         |              |              |              |        |
| #L1MdF_I     | .....      | .....      | Y.....     | .....       | .....       | .....        | .....       | .....YS.....        | [2640]        |              |               |         |        |               |         |              |              |              |        |
| #L1MdF_II    | .....      | .....      | G.....     | .....G..... | A.....      | .....        | A.....      | G.....A.....TG..... | C.....G.....  | [2640]       |               |         |        |               |         |              |              |              |        |
| #L1MdF_III   | .....      | .....      | T.....     | .....       | G.....      | A.....       | .....       | A.....G.....        | A.....TG..... | C.....T..... | [2640]        |         |        |               |         |              |              |              |        |
| #L1MdN_I     | .....      | .....      | T.....     | .....       | .....       | A.....       | .....       | .....               | A.....G.....  | .....        | [2640]        |         |        |               |         |              |              |              |        |
| #L1MdA_VII   | .....      | .....      | A.....     | .....       | .....       | A.....       | .....       | .....               | A.....G.....  | .....        | [2640]        |         |        |               |         |              |              |              |        |
| #L1MdMus_I   | .....      | .....      | T.....     | .....       | C.....      | C.....       | A.....      | .....               | A.....        | G.....       | T.....        | [2640]  |        |               |         |              |              |              |        |
| #L1MdFanc_I  | .....      | .....      | T.....     | .....       | C.....      | C.....       | A.....      | .....               | A.....        | G.....       | A.....TG..... | [2640]  |        |               |         |              |              |              |        |
| #L1MdV_I     | .....      | .....      | T.....     | .....       | .....       | .....        | A.....      | .....               | A.....        | G.....       | A.....TG..... | C.....  | T..... | [2640]        |         |              |              |              |        |
| #L1MdFanc_II | .....      | .....      | T.....     | .....       | .....       | T.....       | .....       | .....               | Y.....        | A.....       | .....         | A.....  | G..... | A.....TG..... | [2640]  |              |              |              |        |
| #L1MdMus_II  | .....      | .....      | T.....     | .....       | .....       | H.....       | .....       | .....               | Y.....        | A.....       | .....         | A.....  | G..... | A.....TG..... | C.....  | N.....       | [2640]       |              |        |
| #L1MdV_II    | .....      | .....      | T.....     | .....       | .....       | T.....       | .....       | .....               | A.....        | .....        | A.....        | G.....  | A..... | G.....        | .....   | [2640]       |              |              |        |
| #L1Lx_I      | .....      | .....      | T.....     | .....       | .....       | T.....       | .....       | .....               | A.....        | .....        | A.....        | G.....  | A..... | G.....        | .....   | [2640]       |              |              |        |
| #L1Lx_III    | .....      | .....      | T.....     | .....       | .....       | T.....       | .....       | .....               | A.....        | .....        | RR.....       | .....   | A..... | .....         | GA..... | A.....G..... | [2640]       |              |        |
| #L1Lx_II     | R.....     | .....      | T.....     | .....       | .....       | T.....       | .....       | .....               | AD.....       | .....        | V.....        | .....   | R..... | .....         | A.....  | GA.....      | A.....G..... | [2640]       |        |
| #L1Lx_IV     | .....      | .....      | T.....     | .....       | .....       | D.....       | .....       | .....               | T.....        | .....        | .....         | AA..... | .....  | .....         | A.....  | GA.....      | A.....       | [2640]       |        |
| #L1MdV_III   | .....      | .....      | T.....     | .....       | .....       | T.....       | .....       | .....               | A.....        | .....        | C.....        | .....   | G..... | .....         | G.....  | A.....       | .....        | G.....N..... | [2640] |

|              |                |             |                |             |              |            |             |                   |                   |
|--------------|----------------|-------------|----------------|-------------|--------------|------------|-------------|-------------------|-------------------|
| #L1MdA_I     | ATCACCTAAA     | GAAATAGAAG  | CAGTTATTAA     | TAGTCTCCCA  | ACCAAAAAA    | GCCCAGGACC | AGATGGGTTT  | AGTGCAGAGT        | [2720]            |
| #L1MdA_II    | .....          | .....       | .....          | .....       | .....        | .....      | .....       | .....             | [2720]            |
| #L1MdA_III   | .....          | .....       | .....          | .....       | G.....       | .....      | .....C..... | .....             | [2720]            |
| #L1MdA_IV    | ..C.....       | .....       | .....          | .....       | G.....       | .....      | .....C..... | .....             | [2720]            |
| #L1MdGf_I    | ..C.....       | .....       | .....          | .....       | .....        | .....      | .....       | .....             | [2720]            |
| #L1MdGf_II   | .....          | .....       | .....C.....    | .....       | G.....       | .....      | .....C..... | .....             | [2720]            |
| #L1MdTf_I    | ..C.....       | .....       | .....          | .....       | G.....       | .....      | .....C..... | .....             | [2720]            |
| #L1MdTf_II   | ..C.....       | .....       | .....          | .....       | G.....       | .....      | .....C..... | .....             | [2720]            |
| #L1MdTf_III  | ..C.....       | .....       | .....A.....    | .....       | G.....       | .....      | .....C..... | .....             | [2720]            |
| #L1MdA_V     | ..C.....       | .....       | .....C.....    | .....       | G.....       | .....      | .....       | .....             | [2720]            |
| #L1MdA_VI    | ..C.....       | .....       | .....C.....    | .....       | .....        | .....      | .....       | .....             | [2720]            |
| #L1MdF_V     | ..C.....       | .....       | .....C.....    | .....       | .....        | .....      | .....       | .....             | [2720]            |
| #L1MdF_IV    | ..C.....       | .....       | .....C.....    | .....       | .....        | .....      | .....       | .....             | [2720]            |
| #L1MdF_I     | ..C.....       | .....       | .....          | .....       | G.....       | .....      | .....Y..... | .....             | [2720]            |
| #L1MdF_II    | ..C.C.....     | .....       | .....C.....    | .....       | .....        | .....      | .....       | .....             | [2720]            |
| #L1MdF_III   | ..C.....       | .....       | .....C.....    | .....       | .....        | .....      | .....       | .....             | [2720]            |
| #L1MdN_I     | ..C.....G..... | .....       | .....C.....    | .....       | .....        | .....      | .....       | .....             | [2720]            |
| #L1MdA_VII   | ..C.....       | .....       | .....C.....    | .....       | G.....       | .....      | .....       | .....             | [2720]            |
| #L1MdMus_I   | T.C.....       | .....       | .....C.....    | .....       | .....        | .....      | .....       | .....             | [2720]            |
| #L1MdFanc_I  | T.C.....       | .....       | .....C.C.....  | .....       | .....        | .....      | .....       | .....             | [2720]            |
| #L1MdV_I     | ..C.....       | .....       | .....C.....    | .....       | .....        | AA.....    | .....       | .....             | [2720]            |
| #L1MdFanc_II | ..C.....       | .....       | .....C.....    | .....       | .....        | D.....     | .....       | .....             | [2720]            |
| #L1MdMus_II  | DN.CH.....     | .....       | GD.C.....      | .....Y..... | .....        | D.....     | .....       | .....             | [2720]            |
| #L1MdV_II    | ..C.....       | .....A..... | .....C.....    | .....       | .....        | N.....     | .....Y..... | .....             | [2720]            |
| #L1Lx_I      | ..C.....       | .....       | .....A.....    | .....C..... | .....        | .....      | .....       | .....             | [2720]            |
| #L1Lx_III    | .W.C.Y.....    | .....       | D.....C.....   | .....H..... | .....        | H.....     | .....N..... | .....N.....D..... | .....R.....       |
| #L1Lx_II     | .A.C.....      | .....       | R.B.V.C.....   | .....       | .....        | H.....     | .....N..... | .....H.....       | .....V.....       |
| #L1Lx_IV     | .D.C.....      | .....       | R.....C.Y..... | .....A..... | .....BY..... | H.....     | .....       | .....             | .....A.....       |
| #L1MdV_III   | .A.C.....      | .....       | .....C.....    | .....       | .....        | .....      | .....       | .....             | .....G.....A..... |

|              |             |             |             |              |                 |             |             |               |                   |
|--------------|-------------|-------------|-------------|--------------|-----------------|-------------|-------------|---------------|-------------------|
| #L1MdA_I     | TCTATCAGAC  | CTTCAAAGAA  | GATCTAATTC  | CAATTCTGCA   | CAAACATTT       | CACAAAATAG  | AAGTAGAAGG  | TACTCTACCC    | [2800]            |
| #L1MdA_II    | .....       | .....       | .....       | .....G.....  | .....           | .....       | .....       | .....         | [2800]            |
| #L1MdA_III   | .....       | .....       | .....       | .....G.....  | .....           | .....       | .....       | .....         | [2800]            |
| #L1MdA_IV    | .....       | .....       | .....       | .....G.....  | .....           | .....       | .....       | .....         | [2800]            |
| #L1MdGf_I    | .....       | .....       | .....       | .....G.....  | .....           | .....       | .....G..... | .....         | [2800]            |
| #L1MdGf_II   | .....       | .....       | .....       | .....G.....  | .....           | .....       | .....       | .....         | [2800]            |
| #L1MdTf_I    | .....       | .....       | .....C..... | .....G.....  | .....T.....     | .....G..... | .....       | .....T.....   | [2800]            |
| #L1MdTf_II   | .....       | .....       | .....C..... | .....G.....  | .....T.....     | .....G..... | .....       | .....T.....   | [2800]            |
| #L1MdTf_III  | .....       | .....       | .....       | .....G.....  | .....T.....     | .....G..... | .....       | .....A.....   | [2800]            |
| #L1MdA_V     | ..C.....    | .....       | .....C..... | .....G.....  | .....C.....     | .....       | .....G..... | .....A.....   | [2800]            |
| #L1MdA_VI    | .....       | .....       | .....       | .....G.....  | .....C.....     | .....       | .....       | .....         | [2800]            |
| #L1MdF_V     | .....       | .....       | .....G..... | .....T.....  | .....C.....     | .....       | .....C..... | .....         | [2800]            |
| #L1MdF_IV    | .....       | .....       | .....G..... | .....T.....  | .....C.....     | .....       | .....C..... | .....         | [2800]            |
| #L1MdF_I     | .....       | .....       | .....C..... | .....G.....  | .....T.....     | .....C..... | .....       | .....AYR..... | [2800]            |
| #L1MdF_II    | .....       | .....       | .....C..... | .....G.....  | .....T.....     | .....C..... | .....       | .....AC.....  | [2800]            |
| #L1MdF_III   | .....       | .....       | .....C..... | .....G.....  | .....T.....     | .....C..... | .....       | .....AC.....  | [2800]            |
| #L1MdN_I     | ..C.....    | .....       | .....C..... | .....G.....  | .....C.....     | .....       | .....       | .....G.....   | .....A.....       |
| #L1MdA_VII   | .....       | .....       | .....       | .....G.....  | .....C.....     | .....       | .....       | .....         | [2800]            |
| #L1MdMus_I   | .....       | .....       | .....C..... | .....C.....  | .....C.....     | .....       | .....       | .....AC.....  | [2800]            |
| #L1MdFanc_I  | .....       | .....       | .....C..... | .....C.....  | .....Y.T.....   | .....C..... | .....       | .....AC.....  | [2800]            |
| #L1MdV_I     | .....       | .....       | H.....      | .....G.....  | .....T.T.....   | .....C..... | .....       | .....AC.....  | [2800]            |
| #L1MdFanc_II | .....       | .....       | .....C..... | .....        | .....C.....     | .....       | .....       | .....AC.....  | [2800]            |
| #L1MdMus_II  | ..V.....    | .....       | N.C.....    | .....        | .....C.T.....   | .....C..... | .....       | .....AC.....  | .....H.....       |
| #L1MdV_II    | .....Y..... | .....R..... | ..C.....    | .....        | .....W.C.T..... | .....C..... | .....       | .....AC.....  | [2800]            |
| #L1Lx_I      | .....       | .....       | .....C..... | .....        | .....W.C.T..... | .....C..... | .....       | .....AC.....  | [2800]            |
| #L1Lx_III    | .....       | .....       | .....C..... | .....AN..... | .....A.CHT..... | .....C..... | .....       | .....AC.....  | .....A.H.....     |
| #L1Lx_II     | ..N.....    | .....       | .....C..... | .....        | .....A.CTT..... | YG..HN..... | .....C..... | .....AC.....  | .....A.YA..B..... |
| #L1Lx_IV     | .....       | .....       | .....C..... | .....        | .....A.CTT..... | .....C..... | .....       | .....AC.....  | .....A.A.....     |
| #L1MdV_III   | .....T..... | .....       | .....C..... | .....        | .....A.CTT..... | .....C..... | .....       | .....AC.....  | .....D.A.....     |

|              |                |            |            |             |                |            |            |              |        |
|--------------|----------------|------------|------------|-------------|----------------|------------|------------|--------------|--------|
| #L1MdA_I     | AACTCATTTT     | ATGAAGCCAC | TATTACTCTG | ATACCTAAAC  | CACAGAAAGA     | TCCAACAAAG | ATAGAGAACT | TCAGACCAAT   | [2880] |
| #L1MdA_II    | .....          | .....      | .....      | .....       | .....          | C.....     | .....      | .....        | [2880] |
| #L1MdA_III   | .....          | .....      | .....      | .....       | .....          | C.....     | .....      | .....        | [2880] |
| #L1MdA_IV    | .....          | .....      | A.....     | .....       | .....          | .....      | .....      | .....        | [2880] |
| #L1MdGf_I    | .....          | .....      | .....      | .....       | .....          | .....      | .....      | .....        | [2880] |
| #L1MdGf_II   | .....          | .....      | .....      | .....       | .....          | C.....     | .....      | .....        | [2880] |
| #L1MdTf_I    | .....          | .....      | .....      | .....       | .....          | .....      | .....      | .....        | [2880] |
| #L1MdTf_II   | .....          | .....      | .....      | .....       | .....          | .....      | .....      | .....        | [2880] |
| #L1MdTf_III  | .....          | .....      | .....      | .....       | .....          | .....      | .....      | .....        | [2880] |
| #L1MdA_V     | .....C.....    | .....      | A.....     | .....       | .....          | .....      | .....      | .....        | [2880] |
| #L1MdA_VI    | .....C.....    | .....      | A.....     | .....       | .....          | .....      | .....      | .....        | [2880] |
| #L1MdF_V     | ..T.....C..... | .....      | A.....     | .....       | .....          | C.....     | .....      | .....        | [2880] |
| #L1MdF_IV    | ..Y.....C..... | .....      | A.....     | .....       | .....          | C.....     | .....      | .....        | [2880] |
| #L1MdF_I     | .....C.....    | .....      | A.....     | .....       | .....          | A.....     | C.....     | .....        | [2880] |
| #L1MdF_II    | .....C.....    | .....      | A.....     | .....       | .....          | A.....     | C.C.....   | .....        | [2880] |
| #L1MdF_III   | .....C.....    | .....      | A.....     | .....       | .....          | A.....     | C.....     | .....        | [2880] |
| #L1MdN_I     | .....C.....    | .....      | A.....     | .....       | .....          | .....      | .....      | .....        | [2880] |
| #L1MdA_VII   | .....C.....    | .....      | A.....     | .....       | .....          | .....      | .....      | .....        | [2880] |
| #L1MdMus_I   | ..T.....C..... | .....      | A.....     | .....       | .....          | C.....     | .....      | A.....       | [2880] |
| #L1MdFanc_I  | ..T.....C..... | .....      | A.....     | .....       | .....          | C.....     | .....      | A.....       | [2880] |
| #L1MdV_I     | ..T.....C..... | .....      | A.....     | .....       | .....          | T.....     | C.....     | .....        | [2880] |
| #L1MdFanc_II | ..T.....C..... | .....      | A.....     | .....       | .....          | T.....     | C.....     | A.....       | [2880] |
| #L1MdMus_II  | ..T.....C..... | .....      | A.....     | .....       | .....          | T.D.N..... | .....      | W.....H..... | [2880] |
| #L1MdV_II    | ..T.G.C.....   | .....      | A.....     | .....       | .....          | C.....     | C.....     | A.....       | [2880] |
| #L1Lx_I      | ..T.G.C.....   | .....      | A.....     | .....       | .....          | C.....     | C.....     | A.....       | [2880] |
| #L1Lx_III    | ..T.....C..... | .....      | A.....     | .....G..... | .....D..B..... | C.....     | C.....     | V.....       | A..... |
| #L1Lx_II     | ..T.G.C.....   | .....      | A.....     | .....       | .....          | C.....     | CN.....    | A.....       | [2880] |
| #L1Lx_IV     | ..T.G.C.....   | .....      | A.....     | .....       | .....G.....    | A.....     | .....      | A.....       | [2880] |
| #L1MdV_III   | ..T.G.C.....   | .....      | A.....     | .....       | .....G.T.....  | .....      | C.A.....   | A.....       | [2880] |

|              |           |            |            |            |            |            |            |            |        |
|--------------|-----------|------------|------------|------------|------------|------------|------------|------------|--------|
| #L1MdA_I     | TTCTCTATG | AATATCGATG | CAAAAATCCT | CAATAAAATT | CTCGCTAACC | GAATCCAAGA | ACACATTAAA | GCAATCATCC | [2960] |
| #L1MdA_II    | .....     | .....      | .....      | .....      | .....      | .....      | .....      | .....      | [2960] |
| #L1MdA_III   | .....     | .....      | .....      | .....      | .....      | .....      | .....      | .....      | [2960] |
| #L1MdA_IV    | .....     | .....      | .....M.    | .....      | .....      | .....      | .....      | .....      | [2960] |
| #L1MdGf_I    | .....     | .....      | .....      | .....T     | .....      | .....      | .....      | .....A     | [2960] |
| #L1MdGf_II   | .....     | .....      | .....      | .....      | .....      | .....      | .....      | .....      | [2960] |
| #L1MdTf_I    | .....     | .....C     | .....      | .....      | .....T     | .....      | .....      | .....      | [2960] |
| #L1MdTf_II   | .....     | .....C     | .....      | .....T     | .....T     | .....      | .....      | .....      | [2960] |
| #L1MdTf_III  | .....     | .....      | .....      | .....      | .....      | .....      | .....      | .....      | [2960] |
| #L1MdA_V     | .....C    | .....      | .....      | .....      | .....      | .....      | .....      | .....      | [2960] |
| #L1MdA_VI    | .....C    | .....      | .....A     | .....      | .....      | .....W     | .....      | .....A     | [2960] |
| #L1MdF_V     | .....C    | .....      | .....M     | .....      | .....      | .....Y     | .....      | .....C     | [2960] |
| #L1MdF_IV    | .....C    | .....      | .....A     | .....      | .....      | .....      | .....      | .....C     | [2960] |
| #L1MdF_I     | .....C    | .....      | .....      | .....      | .....G     | .....      | .....      | .....C     | [2960] |
| #L1MdF_II    | A         | .....C     | .....      | .....      | .....T     | .....G     | .....      | .....T     | [2960] |
| #L1MdF_III   | .....C    | .....      | .....      | .....      | .....G     | .....      | .....      | .....C     | [2960] |
| #L1MdN_I     | .....C    | .....      | .....      | .....      | .....      | .....      | .....      | .....T     | [2960] |
| #L1MdA_VII   | .....C    | .....      | .....A     | .....      | .....      | .....      | .....      | .....      | [2960] |
| #L1MdMus_I   | .....C    | .....      | .....A     | .....      | .....C     | .....      | .....A     | .....C     | [2960] |
| #L1MdFanc_I  | .....C    | .....      | .....A     | .....      | .....C     | .....      | .....A     | .....C     | [2960] |
| #L1MdV_I     | .....C    | .....      | .....A     | .....      | .....      | .....      | .....      | .....C     | [2960] |
| #L1MdFanc_II | .....C    | .....      | .....Y     | .....      | .....A     | .....      | .....      | .....C     | [2960] |
| #L1MdMus_II  | .....C    | .....      | .....A     | .....      | .....      | .....V     | .....      | .....C     | [2960] |
| #L1MdV_II    | .....C    | .....      | .....A     | .....      | .....      | .....      | .....      | .....C     | [2960] |
| #L1Lx_I      | .....C    | .....      | .....A     | .....      | .....      | .....      | .....      | .....C     | [2960] |
| #L1Lx_III    | .....C    | .....      | .....A     | .....      | .....      | .....B     | .....H     | .....      | [2960] |
| #L1Lx_II     | .....C    | .....      | .....HA    | .....      | .....      | .....BA    | .....A     | .....V     | [2960] |
| #L1Lx_IV     | .....C    | .....      | .....T     | .....      | .....A     | .....      | .....TD    | .....A     | [2960] |
| #L1MdV_III   | C         | .....C     | .....T     | .....      | .....A     | .....      | .....      | .....T     | [2960] |

|              |            |            |            |            |             |            |            |            |        |
|--------------|------------|------------|------------|------------|-------------|------------|------------|------------|--------|
| #L1MdA_I     | ATCCTGACCA | AGTAGGTTTT | ATTCCAGGGA | TGCAGGGATG | GTTTAAATATA | CGAAAATCCA | TCAATGTAAT | CCATTATATA | [3040] |
| #L1MdA_II    | .....      | .....      | .....      | .....      | .....       | .....      | .....      | .....      | [3040] |
| #L1MdA_III   | .....      | .....      | .....V     | .....      | .....       | .....      | .....      | .....      | [3040] |
| #L1MdA_IV    | .....      | .....      | .....      | .....      | .....       | .....      | .....      | .....      | [3040] |
| #L1MdGf_I    | .....      | .....      | .....      | .....      | .....       | .....      | .....      | .....      | [3040] |
| #L1MdGf_II   | .....      | .....      | .....      | .....      | .....       | .....      | .....      | .....      | [3040] |
| #L1MdTf_I    | .....      | .....      | .....      | .....      | .....       | .....      | .....      | .....      | [3040] |
| #L1MdTf_II   | .....      | .....      | .....      | .....      | .....       | .....      | .....      | .....      | [3040] |
| #L1MdTf_III  | .....      | .....      | .....R     | .....      | .....       | .....      | .....      | .....C     | [3040] |
| #L1MdA_V     | .....      | .....      | .....      | .....      | .....       | .....      | .....      | .....      | [3040] |
| #L1MdA_VI    | .....      | .....      | .....      | .....      | .....       | .....G     | .....      | .....C     | [3040] |
| #L1MdF_V     | .....C     | .....      | .....      | .....      | .....       | .....G     | .....      | .....C     | [3040] |
| #L1MdF_IV    | .....C     | .....      | .....      | .....      | .....       | .....G     | .....      | .....C     | [3040] |
| #L1MdF_I     | .....C     | .....      | .....C     | .....      | .....       | .....Y     | .....      | .....G     | [3040] |
| #L1MdF_II    | .....C     | .....      | .....C     | .....      | .....       | .....C     | .....      | .....G     | [3040] |
| #L1MdF_III   | .....C     | .....      | .....C     | .....      | .....       | .....C     | .....      | .....G     | [3040] |
| #L1MdN_I     | .....      | .....      | .....      | .....      | .....       | .....      | .....      | .....      | [3040] |
| #L1MdA_VII   | .....      | .....      | .....      | .....      | .....       | .....G     | .....      | .....C     | [3040] |
| #L1MdMus_I   | .....A     | .....      | .....C     | .....C     | .....       | .....G     | .....      | .....C     | [3040] |
| #L1MdFanc_I  | .....A     | .....      | .....C     | .....C     | .....       | .....T     | .....G     | .....C     | [3040] |
| #L1MdV_I     | .....A     | .....      | .....Y     | .....C     | .....       | .....B     | .....      | .....G     | [3040] |
| #L1MdFanc_II | .....A     | .....      | .....T     | .....C     | .....C      | .....      | .....G     | .....C     | [3040] |
| #L1MdMus_II  | .....A     | .....      | .....T     | .....C     | .....C      | .....      | .....G     | .....C     | [3040] |
| #L1MdV_II    | .....A     | .....      | .....T     | .....C     | .....C      | .....      | .....R     | .....      | [3040] |
| #L1Lx_I      | .....A     | .....      | .....T     | .....C     | .....C      | .....      | .....      | .....G     | [3040] |
| #L1Lx_III    | H          | .....A     | .....T     | .....C     | .....C      | .....      | .....      | .....G     | [3040] |
| #L1Lx_II     | .....C     | .....      | .....A     | .....      | .....       | .....      | .....VC    | .....C     | [3040] |
| #L1Lx_IV     | .....C     | .....      | .....A     | .....      | .....       | .....      | .....      | .....G     | [3040] |
| #L1MdV_III   | .....C     | .....      | .....AC    | .....      | .....T      | .....      | .....      | .....G     | [3040] |

|              |           |           |            |            |            |           |            |            |        |
|--------------|-----------|-----------|------------|------------|------------|-----------|------------|------------|--------|
| #L1MdA_I     | AACAACTCA | AAGACAAAA | CCACATGATC | ATCTCGTTAG | ATGCAGAAAA | AGCATTGAC | AAGATCCAAC | ACCCATTCAT | [3120] |
| #L1MdA_II    | .....     | .....     | .....      | .....      | .....      | .....     | .....      | .....      | [3120] |
| #L1MdA_III   | .....     | .....     | .....      | .....      | .....      | .....     | .....Y     | .....      | [3120] |
| #L1MdA_IV    | .....     | .....     | .....      | .....      | .....      | .....     | .....      | .....      | [3120] |
| #L1MdGf_I    | .....     | .....     | .....      | .....      | .....      | .....     | .....      | .....      | [3120] |
| #L1MdGf_II   | .....     | .....     | .....      | .....      | .....      | .....     | .....      | .....      | [3120] |
| #L1MdTf_I    | .....     | .....     | .....      | .....      | .....      | .....     | .....      | .....      | [3120] |
| #L1MdTf_II   | .....     | .....     | .....      | .....      | .....      | .....     | .....      | .....      | [3120] |
| #L1MdTf_III  | .....     | .....     | .....      | .....R     | .....      | .....     | .....      | .....      | [3120] |
| #L1MdA_V     | .....     | .....     | .....      | .....      | .....G     | .....     | .....C     | .....      | [3120] |
| #L1MdA_VI    | .....     | .....     | .....      | .....      | .....G     | .....G    | .....      | .....A     | [3120] |
| #L1MdF_V     | .....     | .....     | .....      | .....      | .....G     | .....G    | .....      | .....A     | [3120] |
| #L1MdF_IV    | .....     | .....     | .....      | .....      | .....G     | .....G    | .....      | .....A     | [3120] |
| #L1MdF_I     | .....     | .....     | .....      | .....      | .....T     | .....G    | .....      | .....A     | [3120] |
| #L1MdF_II    | .....     | .....     | .....      | .....      | .....T     | .....G    | .....      | .....A     | [3120] |
| #L1MdF_III   | .....     | .....     | .....      | .....      | .....T     | .....G    | .....      | .....A     | [3120] |
| #L1MdN_I     | .....     | .....     | .....      | .....      | .....G     | .....     | .....      | .....C     | [3120] |
| #L1MdA_VII   | .....     | .....     | .....      | .....      | .....G     | .....R    | .....      | .....      | [3120] |
| #L1MdMus_I   | .....     | .....     | .....T     | .....      | .....T     | .....G    | .....      | .....A     | [3120] |
| #L1MdFanc_I  | .....     | .....     | .....      | .....      | .....T     | .....G    | .....      | .....A     | [3120] |
| #L1MdV_I     | .....     | .....     | .....      | .....      | .....T     | .....G    | .....      | .....A     | [3120] |
| #L1MdFanc_II | .....     | .....     | .....      | .....      | .....T     | .....G    | .....      | .....A     | [3120] |
| #L1MdMus_II  | .....     | .....     | .....      | .....      | .....T     | .....G    | .....      | .....A     | [3120] |
| #L1MdV_II    | .....     | .....     | .....H     | .....      | .....T     | .....G    | .....      | .....AR    | [3120] |
| #L1Lx_I      | .....     | .....R    | .....M     | .....      | .....B     | .....     | .....H     | .....A     | [3120] |
| #L1Lx_III    | .....     | .....A    | .....H     | .....Y     | .....      | .....T    | .....A     | .....N     | [3120] |
| #L1Lx_II     | .....N    | .....     | .....RA    | .....N     | .....      | .....B    | .....H     | .....Y     | [3120] |
| #L1Lx_IV     | .....     | .....     | .....A     | .....      | .....T     | .....A    | .....      | .....      | [3120] |
| #L1MdV_III   | .....     | .....     | .....A     | .....      | .....T     | .....A    | .....      | .....      | [3120] |

|              |          |            |            |            |            |           |           |            |        |
|--------------|----------|------------|------------|------------|------------|-----------|-----------|------------|--------|
| #L1MdA_I     | GATAAAGT | TTGGAAAGAT | CAGGAATTCA | AGGCCCATAC | CTAAACATGA | TAAAGCAAT | CTACAGCAA | CCAGTAGCCA | [3200] |
| #L1MdA_II    | .....    | .....      | .....      | .....      | .....      | .....     | .....     | .....      | [3200] |
| #L1MdA_III   | .....    | .....      | .....      | .....      | .....      | .....     | .....     | .....      | [3200] |
| #L1MdA_IV    | .....C   | .....      | .....      | .....      | .....      | .....     | .....     | .....      | [3200] |
| #L1MdGf_I    | .....    | .....      | .....      | .....      | .....A     | .....     | .....     | .....      | [3200] |
| #L1MdGf_II   | .....G   | .....      | .....      | .....      | .....      | .....     | .....     | .....      | [3200] |
| #L1MdTf_I    | .....C   | .....      | .....A     | .....      | .....      | .....     | .....     | .....      | [3200] |
| #L1MdTf_II   | .....C   | .....      | .....A     | .....      | .....      | .....     | .....     | .....      | [3200] |
| #L1MdTf_III  | .....C   | .....      | .....      | .....      | .....      | .....     | .....     | .....      | [3200] |
| #L1MdA_V     | .....C   | .....      | .....      | .....      | .....      | .....     | .....     | .....      | [3200] |
| #L1MdA_VI    | .....C   | .....      | .....      | .....      | .....      | .....     | .....     | .....      | [3200] |
| #L1MdF_V     | .....C   | .....      | .....      | .....      | .....      | .....     | .....     | .....      | [3200] |
| #L1MdF_IV    | .....C   | .....      | .....      | .....      | .....      | .....     | .....     | .....      | [3200] |
| #L1MdF_I     | .....C   | .....      | .....      | .....      | .....      | .....     | .....A    | .....      | [3200] |
| #L1MdF_II    | .....C   | .....      | .....      | .....      | .....      | .....     | .....     | .....      | [3200] |
| #L1MdF_III   | .....C   | .....      | .....      | .....      | .....M     | .....     | .....     | .....      | [3200] |
| #L1MdN_I     | .....C   | .....      | .....      | .....      | .....      | .....     | .....     | .....      | [3200] |
| #L1MdA_VII   | .....C   | .....      | .....      | .....      | .....      | .....     | .....     | .....      | [3200] |
| #L1MdMus_I   | .....CA  | .....      | .....      | .....      | .....A     | .....     | .....A    | .....      | [3200] |
| #L1MdFanc_I  | .....C   | .....      | .....      | .....      | .....A     | .....     | .....V    | .....      | [3200] |
| #L1MdV_I     | .....C   | .....      | .....      | .....      | .....A     | .....     | .....     | .....      | [3200] |
| #L1MdFanc_II | .....C   | .....      | .....      | .....      | .....A     | .....     | .....A    | .....      | [3200] |
| #L1MdMus_II  | .....C   | .....      | .....      | .....      | .....A     | .....     | .....H    | .....      | [3200] |
| #L1MdV_II    | .....C   | .....      | .....V     | .....      | .....V     | .....A    | .....A    | .....      | [3200] |
| #L1Lx_I      | .....C   | .....      | .....      | .....      | .....A     | .....     | .....A    | .....      | [3200] |
| #L1Lx_III    | .W.....C | .....      | .....      | .....      | .....AG    | .....     | .....A    | .....      | [3200] |
| #L1Lx_II     | .....C   | .....      | .....      | .....      | .....AG    | .....     | .....V    | .....      | [3200] |
| #L1Lx_IV     | .T.....C | .....      | .....      | .....      | .....AG    | .....     | .....A    | .....      | [3200] |
| #L1MdV_III   | .T.....C | .....      | .....      | .....      | .....AG    | .....     | .....A    | .....      | [3200] |

|              |            |            |            |           |            |            |            |            |        |
|--------------|------------|------------|------------|-----------|------------|------------|------------|------------|--------|
| #L1MdA_I     | ACATCAAAGT | AAATGGAGAG | AAGCTGGAAG | CAATCCCCT | AAAATCAGGG | ACTAGACAAG | GCTGCCCACT | TTCTCCCTAC | [3280] |
| #L1MdA_II    | .....      | .....      | .....      | .....     | .....      | .....      | .....      | .....      | [3280] |
| #L1MdA_III   | .....      | .....      | .....      | .....     | .....      | .....      | .....      | .....      | [3280] |
| #L1MdA_IV    | .....      | .....      | .....      | .....     | .....      | .....      | .....      | .....      | [3280] |
| #L1MdGf_I    | .....      | .....      | .....      | .....     | .....      | .....      | .....      | .....      | [3280] |
| #L1MdGf_II   | .....      | .....      | .....      | .....     | .....      | .....      | .....      | .....      | [3280] |
| #L1MdTf_I    | .....      | .....      | .....      | .....     | .....      | .....      | .....      | .....      | [3280] |
| #L1MdTf_II   | .....      | .....      | .....      | .....     | .....      | .....      | .....      | .....      | [3280] |
| #L1MdTf_III  | .....      | .....      | .....      | .....     | .....      | .....      | .....      | .....      | [3280] |
| #L1MdA_V     | .....T     | .....T     | .....      | .....     | .....      | .....      | .....      | .....      | [3280] |
| #L1MdA_VI    | .....T     | .....      | .....      | .....     | .....      | .....      | .....      | .....      | [3280] |
| #L1MdF_V     | .....T     | .....      | .....W     | .....     | .....      | .....      | .....      | .....      | [3280] |
| #L1MdF_IV    | .....T     | .....      | .....      | .....     | .....      | .....      | .....Y     | .....      | [3280] |
| #L1MdF_I     | .....T     | .....      | .....      | .....     | .....      | .....      | .....T     | .....CG    | [3280] |
| #L1MdF_II    | G.....T    | .....T     | .....      | .....     | .....      | .....      | .....T     | .....C     | [3280] |
| #L1MdF_III   | .....T     | .....      | .....      | .....     | .....      | .....      | .....T     | .....C     | [3280] |
| #L1MdN_I     | .....T     | .....      | .....      | .....     | .....      | .....      | .....      | .....      | [3280] |
| #L1MdA_VII   | .....T     | .....      | .....      | .....     | .....      | .....      | .....      | .....      | [3280] |
| #L1MdMus_I   | .....N     | .....      | .....C     | .....     | .....      | .....      | .....      | .....      | [3280] |
| #L1MdFanc_I  | .....C     | .....      | .....A     | .....C    | .....      | .....      | .....      | .....      | [3280] |
| #L1MdV_I     | .....      | .....      | .....      | .....     | .....      | .....      | .....      | .....      | [3280] |
| #L1MdFanc_II | .....C     | .....      | .....A     | .....T    | .....      | .....      | .....      | .....      | [3280] |
| #L1MdMus_II  | .....S     | .....      | .....R     | .....NR   | .....      | .....      | .....      | .....H     | [3280] |
| #L1MdV_II    | .....C     | .....W     | .....A     | .....B    | .....      | .....      | .....H     | .....H     | [3280] |
| #L1Lx_I      | .....C     | .....      | .....A     | .....T    | .....      | .....      | .....      | .....Y     | [3280] |
| #L1Lx_III    | .....C     | .....      | .....A     | .....T    | .....      | .....H     | .....N     | .....W     | [3280] |
| #L1Lx_II     | .....C     | .....      | .....A     | .....T    | .....V     | .....B     | .....NNY   | .....C     | [3280] |
| #L1Lx_IV     | .....C     | .....      | .....A     | .....T    | .....      | .....      | .....D     | .....C     | [3280] |
| #L1MdV_III   | .....C     | .....V     | .....A     | .....T    | .....      | .....      | .....      | .....C     | [3280] |

|              |            |            |            |            |           |            |            |            |        |
|--------------|------------|------------|------------|------------|-----------|------------|------------|------------|--------|
| #L1MdA_I     | CTTTTCAACA | TAGTACTTGA | AGTATTAGCC | AGAGCAATTC | GACAACAAA | GGAGATCAAG | GGGATACAAA | TTGGAAAAGA | [3360] |
| #L1MdA_II    | .....      | .....      | .....      | .....      | .....     | .....      | .....      | .....      | [3360] |
| #L1MdA_III   | .....      | .....      | .....      | .....      | .....     | .....      | .....      | .....      | [3360] |
| #L1MdA_IV    | .Y.....    | .....      | .....V     | .....      | .....     | .....      | .....      | .....      | [3360] |
| #L1MdGf_I    | .....      | .....      | .....      | .....      | .....     | .....      | .....      | .....      | [3360] |
| #L1MdGf_II   | .....      | .....      | .....      | .....      | .....     | .....      | .....      | .....      | [3360] |
| #L1MdTf_I    | .....      | .....      | .....      | .....      | .....     | .....      | .....      | .....      | [3360] |
| #L1MdTf_II   | .....      | .....      | .....      | .....      | .....     | .....      | .....      | .....      | [3360] |
| #L1MdTf_III  | .....      | .....      | .....      | .....      | .....     | .....      | .....      | .....G     | [3360] |
| #L1MdA_V     | .C.....    | .....      | .....CC    | .....      | .....     | .....      | .....      | .....      | [3360] |
| #L1MdA_VI    | .A.....    | .....T     | .....CC    | .....      | .....     | .....      | .....      | .....      | [3360] |
| #L1MdF_V     | .A.....    | .....W     | .....CC    | .....      | .....     | .....      | .....      | .....G     | [3360] |
| #L1MdF_IV    | .A.....    | .....T     | .....CC    | .....      | .....     | .....      | .....      | .....G     | [3360] |
| #L1MdF_I     | .A.....    | .....T     | .....CC    | .....      | .....A    | .....      | .....      | .....G     | [3360] |
| #L1MdF_II    | .A.....    | .....T     | .....CC    | .....      | .....A    | .....      | .....      | .....G     | [3360] |
| #L1MdF_III   | .A.....    | .....T     | .....CC    | .....      | .....A    | .....      | .....      | .....G     | [3360] |
| #L1MdN_I     | .C.....    | .....      | .....CC    | .....      | .....     | .....      | .....      | .....      | [3360] |
| #L1MdA_VII   | .H.....    | .....      | .....CC    | .....      | .....     | .....      | .....      | .....      | [3360] |
| #L1MdMus_I   | .A.....    | .....T     | .....CC    | .....      | .....     | .....      | .....      | .....G     | [3360] |
| #L1MdFanc_I  | .A.....    | .....T     | .....HC    | .....      | .....     | .....B     | .....      | .....G     | [3360] |
| #L1MdV_I     | .A.....    | .....T     | .....CC    | .....      | .....     | .....R     | .....      | .....G     | [3360] |
| #L1MdFanc_II | .A.....    | .....T     | .....CC    | .....      | .....A    | .....      | .....      | .....G     | [3360] |
| #L1MdMus_II  | .A.....    | .....T     | .....D     | .....CC    | .....A    | .....G     | .....D     | .....G     | [3360] |
| #L1MdV_II    | .A.....    | .....T     | .....CC    | .....      | .....A    | .....      | .....D     | .....R     | [3360] |
| #L1Lx_I      | .A.....    | .....T     | .....CC    | .....      | .....A    | .....      | .....A     | .....G     | [3360] |
| #L1Lx_III    | .A.....    | .....T     | .....TC    | .....H     | .....HA   | .....G     | .....A     | .....N     | [3360] |
| #L1Lx_II     | .R.....    | .....T     | .....C     | .....D     | .....CC   | .....A     | .....G     | .....A     | [3360] |
| #L1Lx_IV     | .A.....    | .....T     | .....TC    | .....T     | .....A    | .....G     | .....V     | .....G     | [3360] |
| #L1MdV_III   | .A.....    | .....T     | .....TC    | .....T     | .....R    | .....A     | .....G     | .....A     | [3360] |

|              |            |            |            |            |            |             |               |              |             |        |
|--------------|------------|------------|------------|------------|------------|-------------|---------------|--------------|-------------|--------|
| #L1MdA_I     | GGAAGTCAAA | ATATCACCTT | TTGCAGATGA | TATGATAGTA | TATATAAGTG | ACCCTAAAAA  | TTCTACCAGA    | GAACTCCTAA   | [3440]      |        |
| #L1MdA_II    | .....      | .....      | .....      | .....      | .....      | .....       | .....         | .....        | [3440]      |        |
| #L1MdA_III   | .....      | .....      | .....      | .....      | .....      | .....       | .....         | .....        | [3440]      |        |
| #L1MdA_IV    | .....      | .....      | .....      | .....      | .....      | .....       | .....C.....   | .....        | [3440]      |        |
| #L1MdGf_I    | .....      | .....      | .....      | .....      | .....      | .....       | .....C.....   | .....        | [3440]      |        |
| #L1MdGf_II   | .....      | .....      | .....      | .....      | .....      | .....       | .....         | .....        | [3440]      |        |
| #L1MdTf_I    | .....      | .....      | .....      | .....      | .....      | .....       | .....C.A..... | .....        | [3440]      |        |
| #L1MdTf_II   | .....      | .....      | .....      | .....      | .....      | .....       | .....C.A..... | .....        | [3440]      |        |
| #L1MdTf_III  | .....      | .....      | .....      | .....      | .....      | .....       | .....C.....   | .....        | [3440]      |        |
| #L1MdA_V     | D.....     | .....      | .....      | .....      | .....      | .....       | .....C.....   | .....        | [3440]      |        |
| #L1MdA_VI    | A.....     | .....      | .....      | .....      | .....      | .....       | .....C.....   | .....        | [3440]      |        |
| #L1MdF_V     | A.....     | .....      | .....      | .....      | .....      | .....       | .....C.....   | .....        | [3440]      |        |
| #L1MdF_IV    | A.....     | .....      | .....      | .....      | .....      | .....       | .....C.....   | .....        | [3440]      |        |
| #L1MdF_I     | A.....     | .....      | .....      | .....      | .....      | .....       | .....C.....   | .....        | [3440]      |        |
| #L1MdF_II    | A.....     | W.....     | .....      | .....      | .....      | .....C..... | .....C.....   | .....        | [3440]      |        |
| #L1MdF_III   | A.....     | .....      | .....      | .....      | .....      | .....       | .....C.....   | .....        | [3440]      |        |
| #L1MdN_I     | D.....     | .....      | .....      | .....      | .....      | .....       | .....C.....   | .....        | [3440]      |        |
| #L1MdA_VII   | T.....     | .....      | .....      | .....      | .....      | .....       | .....C.....   | .....        | [3440]      |        |
| #L1MdMus_I   | A.....     | .....      | D.....     | .....      | .....      | .....       | .....C.....   | .....        | [3440]      |        |
| #L1MdFanc_I  | A.....     | .....      | A.....     | .....      | .....      | .....       | .....H.....   | .....C.....  | [3440]      |        |
| #L1MdV_I     | A.....     | .....      | A.....     | .....      | .....      | .....       | .....C.....   | .....        | [3440]      |        |
| #L1MdFanc_II | A.....     | .....      | A.....     | .....      | .....      | .....       | .....C.....   | .....        | [3440]      |        |
| #L1MdMus_II  | A.....     | .....      | A.....     | .....      | .....      | .....       | .....V.....   | .....C.....  | [3440]      |        |
| #L1MdV_II    | A.....     | .....      | A.....     | .....      | .....      | .....       | .....Y.....   | .....C.....  | [3440]      |        |
| #L1Lx_I      | A.....     | .....      | A.....     | .....      | .....      | .....       | .....B.....   | .....Y.....  | [3440]      |        |
| #L1Lx_III    | A.....     | R.....     | A.....     | .....      | V.....     | .....       | .....HT.....  | R.....Y..... | H.....      | [3440] |
| #L1Lx_II     | A.....     | .....      | A.....     | .....      | R.....     | .....       | .....YD.....  | .....CM..... | .....H..... | [3440] |
| #L1Lx_IV     | A.....     | .....      | A.....     | .....      | .....      | .....       | .....CT.....  | .....C.....  | .....C..... | [3440] |
| #L1MdV_III   | A.....     | .....      | A.....     | .....      | C.....     | .....       | .....CT.....  | .....C.....  | .....C..... | [3440] |

|              |            |            |            |            |            |            |           |             |              |             |        |        |        |        |         |        |        |         |        |        |        |
|--------------|------------|------------|------------|------------|------------|------------|-----------|-------------|--------------|-------------|--------|--------|--------|--------|---------|--------|--------|---------|--------|--------|--------|
| #L1MdA_I     | ACCTGATAAA | CAGCTTCGGT | GAAGTAGCTG | GATATAAAAT | AAACTCAAAC | AAGTCAATGG | CCTTTCCTA | TACAAAGAAT  | [3520]       |             |        |        |        |        |         |        |        |         |        |        |        |
| #L1MdA_II    | .....      | .....      | .....      | .....      | .....      | .....      | .....     | .....       | [3520]       |             |        |        |        |        |         |        |        |         |        |        |        |
| #L1MdA_III   | .....      | .....      | .....      | .....      | .....      | .....      | .....     | .....       | [3520]       |             |        |        |        |        |         |        |        |         |        |        |        |
| #L1MdA_IV    | .....      | .....      | .....      | .....      | T.....     | .....      | .....     | .....C..... | [3520]       |             |        |        |        |        |         |        |        |         |        |        |        |
| #L1MdGf_I    | .....      | .....      | T.....     | .....      | T.....     | .....      | .....     | .....C..... | [3520]       |             |        |        |        |        |         |        |        |         |        |        |        |
| #L1MdGf_II   | .....      | .....      | .....      | .....      | .....      | .....      | .....     | .....       | [3520]       |             |        |        |        |        |         |        |        |         |        |        |        |
| #L1MdTf_I    | .....      | .....      | .....      | .....      | T.....     | .....      | .....     | .....C..... | [3520]       |             |        |        |        |        |         |        |        |         |        |        |        |
| #L1MdTf_II   | .....      | .....      | .....      | .....      | T.....     | .....      | .....     | .....C..... | [3520]       |             |        |        |        |        |         |        |        |         |        |        |        |
| #L1MdTf_III  | .....      | .....      | .....      | .....      | T.....     | .....      | .....     | .....C..... | [3520]       |             |        |        |        |        |         |        |        |         |        |        |        |
| #L1MdA_V     | .....      | .....      | .....      | .....      | T.....     | .....      | .....     | .....C..... | [3520]       |             |        |        |        |        |         |        |        |         |        |        |        |
| #L1MdA_VI    | .....      | .....      | .....      | .....      | T.....     | .....      | .....     | .....C..... | [3520]       |             |        |        |        |        |         |        |        |         |        |        |        |
| #L1MdF_V     | .....      | A.....     | .....      | .....      | T.....     | .....      | .....     | .....N..... | C.....G..... | [3520]      |        |        |        |        |         |        |        |         |        |        |        |
| #L1MdF_IV    | .....      | .....      | A.....     | .....      | T.....     | .....      | .....     | .....C..... | .....G.....  | [3520]      |        |        |        |        |         |        |        |         |        |        |        |
| #L1MdF_I     | G.....     | .....      | AR.....    | .....      | W.....     | .....      | .....     | .....G..... | .....V.....  | [3520]      |        |        |        |        |         |        |        |         |        |        |        |
| #L1MdF_II    | G.....     | .....      | A.....     | .....      | T.....     | .....      | .....     | .....C..... | .....G.....  | [3520]      |        |        |        |        |         |        |        |         |        |        |        |
| #L1MdF_III   | G.....     | .....      | AA.....    | .....      | T.....     | .....      | .....     | .....G..... | .....C.....  | [3520]      |        |        |        |        |         |        |        |         |        |        |        |
| #L1MdN_I     | .....      | .....      | .....      | .....      | T.....     | .....      | .....     | .....       | .....C.....  | [3520]      |        |        |        |        |         |        |        |         |        |        |        |
| #L1MdA_VII   | .....      | .....      | .....      | .....      | T.....     | .....      | .....     | .....       | .....C.....  | [3520]      |        |        |        |        |         |        |        |         |        |        |        |
| #L1MdMus_I   | .....      | .....      | A.....     | C.....     | T.....     | .....      | A.....    | G.....      | .....C.....  | G.....      | [3520] |        |        |        |         |        |        |         |        |        |        |
| #L1MdFanc_I  | .....      | .....      | A.....     | C.....     | T.....     | .....      | A.....    | .....       | .....C.....  | G.....      | [3520] |        |        |        |         |        |        |         |        |        |        |
| #L1MdV_I     | .....      | .....      | A.....     | H.....     | T.....     | .....      | R.....    | .....       | .....C.....  | G.....      | [3520] |        |        |        |         |        |        |         |        |        |        |
| #L1MdFanc_II | .....      | .....      | A.....     | H.....     | T.....     | .....      | A.....    | G.....      | .....C.....  | G.....      | [3520] |        |        |        |         |        |        |         |        |        |        |
| #L1MdMus_II  | .....      | .....      | A.....     | .....      | T.....     | .....      | A.....    | G.....      | .....Y.....  | .....C..... | G..... | [3520] |        |        |         |        |        |         |        |        |        |
| #L1MdV_II    | .....      | A.....     | A.....     | H.....     | T.....     | .....      | A.....    | G.....      | .....        | .....C..... | G..... | [3520] |        |        |         |        |        |         |        |        |        |
| #L1Lx_I      | .....      | A.....     | A.....     | .....      | T.....     | .....      | A.....    | G.....      | .....        | .....C..... | G..... | [3520] |        |        |         |        |        |         |        |        |        |
| #L1Lx_III    | V.....     | .....      | A.....     | A.....     | C.....     | A.....     | R.....    | .....       | A.....       | H.....      | G..... | R..... | C..... | V..... | CT..... | G..... | [3520] |         |        |        |        |
| #L1Lx_II     | B.....     | .....      | N.....     | A.....     | NA.....    | Y.....     | A.....    | G.....      | T.....       | .....       | A..... | D..... | .....  | C..... | CW..... | G..... | [3520] |         |        |        |        |
| #L1Lx_IV     | G.....     | .....      | A.....     | A.....     | C.....     | A.....     | D.....    | G.....      | C.....       | T.....      | .....  | A..... | G..... | A..... | .....   | C..... | A..... | CT..... | G..... | [3520] |        |
| #L1MdV_III   | G.....     | .....      | A.....     | A.....     | C.....     | A.....     | .....     | G.....      | T.....       | .....       | A..... | G..... | A..... | .....  | C.....  | Y..... | .....  | CT..... | G..... | B..... | [3520] |

|              |            |            |            |             |            |            |            |             |             |        |        |        |        |        |        |        |
|--------------|------------|------------|------------|-------------|------------|------------|------------|-------------|-------------|--------|--------|--------|--------|--------|--------|--------|
| #L1MdA_I     | AAACAGGCTG | AGAAAGAAAT | TAGGGAAACA | ACACCCCTTCT | CAATAGTCAC | AAATAATATA | AAATATCTTG | GCGTGACTCT  | [3600]      |        |        |        |        |        |        |        |
| #L1MdA_II    | .....      | .....      | .....      | .....       | .....      | .....      | .....      | .....       | [3600]      |        |        |        |        |        |        |        |
| #L1MdA_III   | .....      | .....      | .....      | .....       | .....      | .....      | .....      | .....       | [3600]      |        |        |        |        |        |        |        |
| #L1MdA_IV    | .....      | .....      | .....      | .....       | .....      | .....      | .....      | .....       | [3600]      |        |        |        |        |        |        |        |
| #L1MdGf_I    | .....      | .....      | .....      | .....       | S.....     | .....      | .....      | .....C..... | [3600]      |        |        |        |        |        |        |        |
| #L1MdGf_II   | .....      | .....      | .....      | .....       | .....      | .....      | .....      | .....       | [3600]      |        |        |        |        |        |        |        |
| #L1MdTf_I    | .....      | .....      | .....      | .....       | .....      | .....      | .....      | .....C..... | [3600]      |        |        |        |        |        |        |        |
| #L1MdTf_II   | .....      | .....      | .....      | .....       | .....      | .....      | .....      | .....C..... | [3600]      |        |        |        |        |        |        |        |
| #L1MdTf_III  | .....      | .....      | .....      | .....       | .....      | .....      | .....      | .....C..... | [3600]      |        |        |        |        |        |        |        |
| #L1MdA_V     | .....      | .....      | .....      | .....       | .....      | .....      | .....      | .....       | [3600]      |        |        |        |        |        |        |        |
| #L1MdA_VI    | .....      | .....      | .....      | .....       | .....      | .....      | .....      | .....C..... | [3600]      |        |        |        |        |        |        |        |
| #L1MdF_V     | .....      | .....      | .....      | .....       | .....      | .....      | .....      | .....C..... | [3600]      |        |        |        |        |        |        |        |
| #L1MdF_IV    | .....      | .....      | R.....     | .....       | .....      | .....      | .....      | .....C..... | D.....      | [3600] |        |        |        |        |        |        |
| #L1MdF_I     | .....      | .....      | .....      | .....       | .....      | .....      | .....      | .....C..... | [3600]      |        |        |        |        |        |        |        |
| #L1MdF_II    | .....      | .....      | .....      | .....       | .....      | .....      | .....      | .....C..... | A.....      | [3600] |        |        |        |        |        |        |
| #L1MdF_III   | .....      | .....      | .....      | .....       | .....      | .....      | .....      | .....C..... | [3600]      |        |        |        |        |        |        |        |
| #L1MdN_I     | .....      | .....      | .....      | .....       | .....      | .....      | .....      | .....       | [3600]      |        |        |        |        |        |        |        |
| #L1MdA_VII   | .....      | .....      | .....      | .....       | .....      | .....      | .....      | .....       | [3600]      |        |        |        |        |        |        |        |
| #L1MdMus_I   | .....      | A.....     | .....      | .....       | A.....     | .....      | .....      | .....C..... | T.....      | [3600] |        |        |        |        |        |        |
| #L1MdFanc_I  | .....      | G.....     | A.....     | .....       | A.....     | .....      | .....      | .....C..... | T.....      | [3600] |        |        |        |        |        |        |
| #L1MdV_I     | .....      | .....      | .....      | .....       | .....      | .....      | .....      | .....C..... | T.....      | [3600] |        |        |        |        |        |        |
| #L1MdFanc_II | .....      | .....      | .....      | .....       | .....      | .....      | .....      | .....C..... | T.....      | [3600] |        |        |        |        |        |        |
| #L1MdMus_II  | .....      | .....      | .....      | .....       | .....      | .....      | .....      | .....C..... | KT.....     | [3600] |        |        |        |        |        |        |
| #L1MdV_II    | .....      | .....      | .....      | H.....      | .....      | A.....     | M.....     | .....       | .....C..... | T..... | B..... | [3600] |        |        |        |        |
| #L1Lx_I      | .....      | N.....     | .....      | .....       | .....      | A.....     | H.....     | .....       | .....C..... | T..... | [3600] |        |        |        |        |        |
| #L1Lx_III    | .....      | .....      | .....      | G.....      | .....      | A.....     | .....      | N.....      | .....       | N..... | B..... | N..... | T..... | [3600] |        |        |
| #L1Lx_II     | .....      | D.....     | R.....     | .....       | .....      | .....      | .....      | .....       | .....Y..... | .....  | .....  | .....  | T..... | [3600] |        |        |
| #L1Lx_IV     | .....      | .....      | .....      | .....       | G.....     | .....      | .....      | .....       | .....C..... | .....  | .....  | .....  | T..... | [3600] |        |        |
| #L1MdV_III   | .....      | .....      | .....      | .....       | G.....     | .....      | .....      | N.....      | .....       | T..... | .....  | .....  | C..... | C..... | T..... | [3600] |

```

#L1MdA_I      AACTAAGGAG GTGAAAGATC TGTATGATAA AACTTTCAAA TCTCTGAAGA AAGAAATTA AAGAAGATCTC AGAAGATGGA [3680]
#L1MdA_II     .....A .....R..... [3680]
#L1MdA_III    ..... [3680]
#L1MdA_IV     .....G [3680]
#L1MdGf_I     .....A..A.....G [3680]
#L1MdGf_II    .....A.....A.....G [3680]
#L1MdTf_I     ..G....A.....G..C..... [3680]
#L1MdTf_II    ..G....A.....G..C..... [3680]
#L1MdTf_III   .....A.....G..... [3680]
#L1MdA_V      .....A.....G..C..... [3680]
#L1MdA_VI     .....A.....G..... [3680]
#L1MdF_V      .....A.....G..... [3680]
#L1MdF_IV     .....A.....G..... [3680]
#L1MdF_I      .....A.....G.....A..... [3680]
#L1MdF_II     .....A.....C..G.....WG..... [3680]
#L1MdF_III    .....A.....G..... [3680]
#L1MdN_I      .....A.....G..C..... [3680]
#L1MdA_VII    .....A.....G..... [3680]
#L1MdMus_I    .....A.....C..G.....G.....D..... [3680]
#L1MdFanc_I   .....A.....G.....G..... [3680]
#L1MdV_I      .....A.....G.....C..... [3680]
#L1MdFanc_II  .....A.....G.....CG..... [3680]
#L1MdMus_II   .....R.A.....K.....G.....CG.....N..... [3680]
#L1MdV_II     .....S.A.....G.....CG..... [3680]
#L1Lx_I       .....S.A.....G.....CG..... [3680]
#L1Lx_III    ..N..RV.A.....V...C..G.....CG.....H...D..... [3680]
#L1Lx_II     .....C.A..V..D...H..G..H...G.....CG...D..... [3680]
#L1Lx_IV     ..C..AC.A.....C..G.....CG.....C..... [3680]
#L1MdV_III   ..C..C.C.A.....D...Y..G.....C..... [3680]

```

```

#L1MdA_I      AAGATCTCCC ATGCTCATGG ATTGGCAGGA TCAACATTGT AAAAAATGGCT ATCTTGCCAA AAGCAATCTA CAGATTCAAT [3760]
#L1MdA_II     ..... [3760]
#L1MdA_III    ..... [3760]
#L1MdA_IV     ..... [3760]
#L1MdGf_I     ..... [3760]
#L1MdGf_II    ..... [3760]
#L1MdTf_I     .....C..... [3760]
#L1MdTf_II    .....C..... [3760]
#L1MdTf_III   .....Y..... [3760]
#L1MdA_V      ..... [3760]
#L1MdA_VI     ..... [3760]
#L1MdF_V      .....T..A..... [3760]
#L1MdF_IV     .....T..A..... [3760]
#L1MdF_I      .....Y..... [3760]
#L1MdF_II     .....C.....T..A..... [3760]
#L1MdF_III    .....Y..W..... [3760]
#L1MdN_I      ..... [3760]
#L1MdA_VII    ..... [3760]
#L1MdMus_I    .....T..T..A.....C..G..... [3760]
#L1MdFanc_I   .....T..T..A..H.....C..G..... [3760]
#L1MdV_I      .....T..T..A.....G..... [3760]
#L1MdFanc_II  .....T..T..A.....G.....Y..... [3760]
#L1MdMus_II   ..N.....Y..T..H.....G..... [3760]
#L1MdV_II     .....T..T..A..M.....G..... [3760]
#L1Lx_I       .....T..T..A.....G..... [3760]
#L1Lx_III    .....H.....T..T..A.....N..C.....G..... [3760]
#L1Lx_II     .....Y.....T..T..A.....C.....G..... [3760]
#L1Lx_IV     .....H.....T..T..A.....C.....TG..... [3760]
#L1MdV_III   .....T..T..A.....C.....G..... [3760]

```

```

#L1MdA_I      GCAATCCCCA TCAAATTC AACTCAATTC TTCAACGAAT TGGAAGGAGC AATTGCAAA TTTGTCTGGA ATAACAAAAA [3840]
#L1MdA_II     ..... [3840]
#L1MdA_III    .....A.....CA..... [3840]
#L1MdA_IV     .....A..R.....C.....CA..... [3840]
#L1MdGf_I     .....A.....CA..... [3840]
#L1MdGf_II    .....A.....CA..... [3840]
#L1MdTf_I     .....T.....A.....CA..... [3840]
#L1MdTf_II    ..T.....A.....CA..... [3840]
#L1MdTf_III   .....A.....CA..... [3840]
#L1MdA_V      .....A..A.....C.....CA..... [3840]
#L1MdA_VI     .....A..A.....C.....CA..... [3840]
#L1MdF_V      .....A..A.G.....C.....CA..... [3840]
#L1MdF_IV     .....A..A.G.....C.....CA..... [3840]
#L1MdF_I      .....A..A.G.....CG..G..CA..... [3840]
#L1MdF_II     .....A..A.G.....CG..G..CA..... [3840]
#L1MdF_III    .....N.....A..A.G.....CG..R..CA..... [3840]
#L1MdN_I      .....A..A.....C.....CA..... [3840]
#L1MdA_VII    .....A..A.....C.....CA..... [3840]
#L1MdMus_I    .....CT..G..A..A.G.....CA..... [3840]
#L1MdFanc_I   .....CT..GW..A..A.G.....CA.....T..... [3840]
#L1MdV_I      .....N.....A..A.G.....CA..... [3840]
#L1MdFanc_II  .....C..G..A..A.G.....CA..... [3840]
#L1MdMus_II   .....M..R..A..A.G.....CA..... [3840]
#L1MdV_II     .....H.....CA..G..A..A.R.H..B.....CA..... [3840]
#L1Lx_I       .....Y.....CA..G..A..A.G.....CA..... [3840]
#L1Lx_III    .....TA..G..AD..A.....C.....CA.H.D..... [3840]
#L1Lx_II     .....TA..G..A..A..Y..B.....CA.H..... [3840]
#L1Lx_IV     .....B.....TA..G..A..A.....CT.....CA.T..... [3840]
#L1MdV_III   .....A.....TA..G..A..A.....CA.T..... [3840]

```



|              |            |            |            |            |            |            |            |            |        |
|--------------|------------|------------|------------|------------|------------|------------|------------|------------|--------|
| #L1MdA_I     | ACCTAGGATA | GCAAAAAGTC | TTCTCAAGGA | TAAAAGAACT | TCTGGCGGAA | TCACCATGCC | AGACCTAAAG | CTTTACTACA | [3920] |
| #L1MdA_II    |            |            |            |            |            |            |            |            | [3920] |
| #L1MdA_III   |            |            |            |            | .C         | .T         | .T         |            | [3920] |
| #L1MdA_IV    |            | .C         |            |            | .C         | .T         | .T         |            | [3920] |
| #L1MdGf_I    |            | .C         |            |            | .C         | .T         | .T         |            | [3920] |
| #L1MdGf_II   |            |            |            |            | .C         | .T         | .T         |            | [3920] |
| #L1MdTf_I    | .G         | .C         |            |            | .C         | .T         | .T         |            | [3920] |
| #L1MdTf_II   | .G         | .C         |            |            | .C         | .T         | .T         |            | [3920] |
| #L1MdTf_III  |            | .C         |            |            | .C         | .T         | .T         |            | [3920] |
| #L1MdA_V     |            | GC         | .T         | .C         | .T         | .T         | .T         |            | [3920] |
| #L1MdA_VI    |            | .C         |            |            | .C         | .T         | .T         |            | [3920] |
| #L1MdF_V     |            | .C         | .K         | .C         | .T         | .T         | .G         |            | [3920] |
| #L1MdF_IV    |            | .C         |            |            | .C         | .T         | .D         |            | [3920] |
| #L1MdF_I     | .G         | .C         |            |            | .C         | .T         | G.A        | .G         | [3920] |
| #L1MdF_II    |            | .C         |            |            | .C         | .T         | C.M        | .G         | [3920] |
| #L1MdF_III   |            | .C         |            |            | .C         | .T         | .G         |            | [3920] |
| #L1MdN_I     |            | GC         | .T         | .C         | .T         | .T         |            |            | [3920] |
| #L1MdA_VII   |            | .C         |            |            | .C         | .T         | .T         |            | [3920] |
| #L1MdMus_I   |            | .C.A       | .CA        | .C         | .B         | .C         | .G         |            | [3920] |
| #L1MdFanc_I  |            | .C.A       | .CA        | .C         | .T         | .H.H       | .G         |            | [3920] |
| #L1MdV_I     |            | .C         | .T         | .YC        | .T         | .T         | .G         |            | [3920] |
| #L1MdFanc_II |            | .C.A       | .CA        | .C         | .T         | .C         | .G         |            | [3920] |
| #L1MdMus_II  |            | .C.M       | .C         | .C         | .DT        | .H         | .G         |            | [3920] |
| #L1MdV_II    | N          | .C.A       | .CA        | .C         | .T         | .N         | TD         | .G         | [3920] |
| #L1Lx_I      |            | .C.A       | .CA        | .C         | .T         | .B         | .C         | .G         | [3920] |
| #L1Lx_III    | .H.Y       | .G         | .C.A       | .CA        | .N         | .NN        | .C         | .G         | [3920] |
| #L1Lx_II     | .C         | .G         | .C.A       | .HA        | .NY        | .N         | .C         | .G         | [3920] |
| #L1Lx_IV     | .C         | .G         | .C.A       | .CA        | .H         | .G         | .S.C       | .G         | [3920] |
| #L1MdV_III   | .C         | .G         | .C.A       | .CA        |            | .G         | .C         | .G.T       | [3920] |

|              |            |             |            |            |            |            |            |            |        |
|--------------|------------|-------------|------------|------------|------------|------------|------------|------------|--------|
| #L1MdA_I     | GAGCAATTGT | GATAAAAAGTC | GCATGGTACT | GGTATAGAGA | CAGACAAGTA | GACCAATGGA | ATAGAATTGA | AGATCCAGAA | [4000] |
| #L1MdA_II    |            |             |            |            |            |            |            |            | [4000] |
| #L1MdA_III   |            |             |            |            |            |            |            | .C         | [4000] |
| #L1MdA_IV    |            |             |            | .VT        |            |            |            | .C         | [4000] |
| #L1MdGf_I    | .G         |             |            |            |            |            |            | .C         | [4000] |
| #L1MdGf_II   |            |             |            |            | .C         |            |            | .C         | [4000] |
| #L1MdTf_I    |            |             |            |            |            | .G         |            | .C         | [4000] |
| #L1MdTf_II   |            |             |            |            |            | .G         |            | .C         | [4000] |
| #L1MdTf_III  | .G         |             |            |            |            |            |            | .C         | [4000] |
| #L1MdA_V     | T          |             |            |            | .T         |            |            | .C         | [4000] |
| #L1MdA_VI    |            | .M          |            |            | .C         |            |            | .C         | [4000] |
| #L1MdF_V     |            |             | .C         |            |            |            |            | .C         | [4000] |
| #L1MdF_IV    |            |             | .C         |            |            |            |            | .C         | [4000] |
| #L1MdF_I     |            | .C          |            |            | .T         |            | .C         | .G         | [4000] |
| #L1MdF_II    |            |             | .C         |            |            |            | .C         | .G         | [4000] |
| #L1MdF_III   |            |             | .C         |            |            |            | .C         | .G         | [4000] |
| #L1MdN_I     |            |             | .T         |            |            |            |            | .C         | [4000] |
| #L1MdA_VII   |            |             | .T         |            |            |            |            | .C         | [4000] |
| #L1MdMus_I   |            |             | .C.C       |            | .G         | .T         |            | .C         | [4000] |
| #L1MdFanc_I  |            |             | .C.T       |            | .G         | .T         |            | .C         | [4000] |
| #L1MdV_I     |            |             | .C         |            | .V         |            |            | .C         | [4000] |
| #L1MdFanc_II |            |             | .C.C       |            | .G         | .T         | .Y         | .C         | [4000] |
| #L1MdMus_II  |            |             | .Y         | .C.C       | .G         | .Y         |            | .C         | [4000] |
| #L1MdV_II    |            |             | .C.T       |            | .G         | .T         | .Y         | .C         | [4000] |
| #L1Lx_I      |            |             | .C.C       |            | .R.G       | .T         |            | .C         | [4000] |
| #L1Lx_III    | .D         |             | .T         | .H.T       | .R.G       | .T         |            | .C         | [4000] |
| #L1Lx_II     | .R.H       |             | .Y         | .C.H       | .N.DB.G    | .T         | .B         | .C         | [4000] |
| #L1Lx_IV     | .D         |             | .T         | .C.T       | .G.R       | .T         |            | .C         | [4000] |
| #L1MdV_III   | .A         |             | .Y         | .C         | .V.G.A     | .T         |            | .C         | [4000] |

|              |            |            |            |            |            |            |            |            |        |
|--------------|------------|------------|------------|------------|------------|------------|------------|------------|--------|
| #L1MdA_I     | ATGAACCCAC | ACACCTATGG | TCACTTGATC | TTCGACAAGG | GAGCTAAAAC | CATCCAGTGG | AAGAAAGACA | GCATTTTCAA | [4080] |
| #L1MdA_II    |            |            |            |            |            |            |            |            | [4080] |
| #L1MdA_III   |            |            |            |            |            |            |            |            | [4080] |
| #L1MdA_IV    |            |            |            |            |            |            |            |            | [4080] |
| #L1MdGf_I    |            |            |            |            |            |            |            |            | [4080] |
| #L1MdGf_II   |            |            |            |            |            |            |            |            | [4080] |
| #L1MdTf_I    |            |            |            |            | .C         |            |            |            | [4080] |
| #L1MdTf_II   |            |            |            |            | .C         |            |            |            | [4080] |
| #L1MdTf_III  |            |            |            |            |            |            |            |            | [4080] |
| #L1MdA_V     |            |            |            |            |            |            |            |            | [4080] |
| #L1MdA_VI    |            |            |            |            |            |            | .A         |            | [4080] |
| #L1MdF_V     |            |            | .T         |            |            |            | .A         |            | [4080] |
| #L1MdF_IV    |            |            | .T         |            |            |            | .A         |            | [4080] |
| #L1MdF_I     | .Y         |            | .T         |            |            |            | .A         |            | [4080] |
| #L1MdF_II    |            |            | .T         |            |            |            | .A         |            | [4080] |
| #L1MdF_III   |            |            | .T         |            |            |            | .A         |            | [4080] |
| #L1MdN_I     |            |            |            |            |            |            | .A         |            | [4080] |
| #L1MdA_VII   |            |            |            |            |            |            |            |            | [4080] |
| #L1MdMus_I   |            |            | .T         |            |            |            | .A         |            | [4080] |
| #L1MdFanc_I  | .T         |            | .T         |            |            |            | .A         |            | [4080] |
| #L1MdV_I     |            |            | .T         |            |            |            | .A         |            | [4080] |
| #L1MdFanc_II |            |            | .T         | .A         |            |            | .A         |            | [4080] |
| #L1MdMus_II  |            | .H         | .T         | .A         |            |            | .A         | .Y         | [4080] |
| #L1MdV_II    | .H         |            | .T         | .A         |            |            | .AR        | .Y         | [4080] |
| #L1Lx_I      | .H         |            | .T         | .A         |            | H          | .DA.AC     | .N         | [4080] |
| #L1Lx_III    | .HN        |            | .T         | .A         |            |            | HRA        | .S         | [4080] |
| #L1Lx_II     | .N         |            | .T         | .D         |            |            | .A         |            | [4080] |
| #L1Lx_IV     |            | .R         | .T         | .A         |            |            | .A         | .N         | [4080] |
| #L1MdV_III   |            | .A         | .T         | .A         |            |            | .A         | .T         | [4080] |

```

#L1MdA_I      CAATTGGTGC TGGCACAACT GGTGTGTTATC GTGTAGAAGA ATGCGAATCG ATCCATACTT ATCTCCTTGT ACTAAGGTCA [4160]
#L1MdA_II     .....
#L1MdA_III    .....
#L1MdA_IV     ..W.....
#L1MdGf_I     .....
#L1MdGf_II    .....
#L1MdTf_I     .....
#L1MdTf_II    .....
#L1MdTf_III   .....
#L1MdA_V      ..A.....
#L1MdA_VI     ..A.....G...A...T...T.C...
#L1MdF_V      ..A.....CG...A...T...T.C...
#L1MdF_IV     ..A.....CG...A...T...T.C...
#L1MdF_I      ..A.....CG...A...T...TTC...
#L1MdF_II     ..A.....C...A...T.K...T...KTAC...
#L1MdF_III    ..A.....CG...A...N...T...T.C...
#L1MdN_I      ..A.....
#L1MdA_VII    ..A.....G...A...T...T.C...
#L1MdMus_I    ..A.....CG...A...T...T...A...C...
#L1MdFanc_I   ..A.....CG...A...T...T...A...C...
#L1MdV_I      ..A.....CG...A...T...T...
#L1MdFanc_II  ..A.....T...CG...A...T...T...A...C...
#L1MdMus_II   H.A.....CG...A...T...W...S...
#L1MdV_II     ..A.....T...CG...D...A...T...T...A...C...
#L1Lx_I       ..A.R...T...CG...B...A...T...A...C...
#L1Lx_III     ..A.....YT...CG...Y.G.A...D.A...T...A...C...
#L1Lx_II      ..A.....YT...CG...Y.D.A...A...NV...B...T...A...N...
#L1Lx_IV      ..A.N...TT...CA...C.A.A...A...T...T...C...A...C...
#L1MdV_III    ..A.....YT...CG...CGG.A...A...T...C...T...A...C...

```

```

#L1MdA_I      AATCTAAGTG GATCAAGGAA CTTACACATAA AACCCAGAGAC ACTGAAACTT ATAGAGGAGA AAGTGGGGAA AAGCCTTGAA [4240]
#L1MdA_II     .....
#L1MdA_III    .....
#L1MdA_IV     .....
#L1MdGf_I     .....
#L1MdGf_II    .....
#L1MdTf_I     .....
#L1MdTf_II    .....
#L1MdTf_III   .....A...A...
#L1MdA_V      .....
#L1MdA_VI     .....G..C...
#L1MdF_V      .....C...S...C...
#L1MdF_IV     .....Y...C...S...C...
#L1MdF_I      .....T...C...A...C...
#L1MdF_II     .....T...W..C...A...C...
#L1MdF_III    .....T...C...A...C...
#L1MdN_I      .....Y...T...C...
#L1MdA_VII    .....C...C...
#L1MdMus_I    ..G.....A...C...T...B...C...
#L1MdFanc_I   ..G.....A..C..C...T.A...C...
#L1MdV_I      ..R.....C...C...
#L1MdFanc_II  ..G.....C...C...
#L1MdMus_II   ..D.....C...D...R...C...
#L1MdV_II     ..G.....R...C...G...C...
#L1Lx_I       ..G.....C...R...G...CV...
#L1Lx_III     ..G.C...D...H...C...T...W...AR...D...G.N...C.R...
#L1Lx_II      ..R.C...H...C...T...H.N...AR...V...C.G...
#L1Lx_IV      ..G.C...C...C...T...T.A...A...T...C...
#L1MdV_III    ..G.C...C...C...D...D...D...G...C...

```

```

#L1MdA_I      GATATGGGCA CAGGGGAAAA ATTCCCTGAAC AGAACACGAA TGGCTTGTCG TGTAAGATCG AGAATCGACA AATGGGACCT [4320]
#L1MdA_II     .....
#L1MdA_III    .....
#L1MdA_IV     .....Y...
#L1MdGf_I     .....T...G...CT...T...
#L1MdGf_II    .....T...T...
#L1MdTf_I     .....T...T...
#L1MdTf_II    .....T...T...
#L1MdTf_III   .....T...T...
#L1MdA_V      .....A...T...G...T...
#L1MdA_VI     .....K...T...T...
#L1MdF_V      .....T...T...
#L1MdF_IV     .....T...T...
#L1MdF_I      .....T...T...A...T...
#L1MdF_II     .....T...T...Y...T...
#L1MdF_III    .....T...T...T...
#L1MdN_I      .....A...T...T...G...T...
#L1MdA_VII    .....T...T...
#L1MdMus_I    .....A...C...A...V...
#L1MdFanc_I   .....A...T...T...
#L1MdV_I      .....T...T...
#L1MdFanc_II  .....N...
#L1MdMus_II   .....V...
#L1MdV_II     .....R...S...A...
#L1Lx_I       B.Y.....D...W...T...H...C...R...A...C...A...D...
#L1Lx_III     S.C.....D...W...T...H...C...R...A...C...A...T...
#L1Lx_II      C.C.....T...C...D...A...N...A...T...
#L1Lx_IV      C.C.....G...C...C...A...C...A...T...
#L1MdV_III    C.Y.....B...C...R...A...A...

```

|              |             |             |               |                   |              |                 |               |             |        |
|--------------|-------------|-------------|---------------|-------------------|--------------|-----------------|---------------|-------------|--------|
| #L1MdA_I     | AATGAAACTC  | CAAAGTTTCT  | GCAAGGCAAA    | AGACACCGTC        | AATAAGACAA   | AAAGACCACC      | AACAGATTGG    | GAAAGGATCT  | [4400] |
| #L1MdA_II    | .....       | .....       | .....         | .....             | .....        | .....           | .....         | .....       | [4400] |
| #L1MdA_III   | .....       | .....       | .....         | .....             | .....        | .....           | .....         | .....       | [4400] |
| #L1MdA_IV    | C.....      | .....C      | .....         | .....             | .....        | .....           | .....         | .....       | [4400] |
| #L1MdGf_I    | .....       | .....       | .....         | .....             | .....G.....  | .....           | .....         | .....       | [4400] |
| #L1MdGf_II   | .....       | .....       | .....         | .....             | .....        | .....           | .....         | .....       | [4400] |
| #L1MdTf_I    | .....       | .....       | .....         | .....T.....       | .....T.....  | .....           | .....C.....   | .....       | [4400] |
| #L1MdTf_II   | .....       | .....       | .....         | .....T.....       | .....T.....  | .....           | .....C.....   | .....       | [4400] |
| #L1MdTf_III  | .....       | .....       | .....         | .....             | .....        | .....G.....     | .....         | .....       | [4400] |
| #L1MdA_V     | C.....G     | .....C      | .....         | .....             | .....        | .....           | .....         | .....       | [4400] |
| #L1MdA_VI    | C.....G     | .....C      | .....T.....   | .....             | .....        | .....G.....     | .....         | .....       | [4400] |
| #L1MdF_V     | C..A...T.G  | .....C..... | .....T.....   | .....             | .....        | .....G.....     | .....         | .....       | [4400] |
| #L1MdF_IV    | C..A...T.G  | .....C..... | .....T.....   | .....             | .....        | .....G.....     | .....         | .....       | [4400] |
| #L1MdF_I     | C..A...T.G  | .....C..... | .....A.....   | .....             | .....        | .....G.....     | .....         | .....       | [4400] |
| #L1MdF_II    | C..A...T.G  | .....C..... | .....         | .....             | .....        | .....           | .....         | .....       | [4400] |
| #L1MdF_III   | C..A...GT.G | .....C..... | .....         | .....             | .....        | .....           | .....         | .....       | [4400] |
| #L1MdN_I     | C.....G     | .....C      | .....         | .....             | .....        | .....           | .....         | .....       | [4400] |
| #L1MdA_VII   | C.....G     | .....C      | .....         | .....             | .....        | .....G.....     | .....         | .....       | [4400] |
| #L1MdMus_I   | C..A...T.G  | .....C..... | .....T.G..... | .....T.....       | .....        | .....G.....     | .....A.T..... | .....       | [4400] |
| #L1MdFanc_I  | C..A...T.G  | .....C..... | .....T.....   | .....T.....       | .....        | .....G.....     | .....         | .....T..... | [4400] |
| #L1MdV_I     | C..A...T.G  | .....C..... | .....T.....   | .....T.....       | .....        | .....G.....     | .....         | .....       | [4400] |
| #L1MdFanc_II | C..A...T.G  | .....C..... | .....T.....   | .....T.....       | .....        | .....G.....     | .....         | .....       | [4400] |
| #L1MdMus_II  | C..A...T.G  | .....C..... | .....T.....   | .....T.....       | .....        | .....G.....     | .....         | .....       | [4400] |
| #L1MdV_II    | C..A...T.G  | .....C..... | .....T.....   | .....G.....T..... | .....M.....  | .....G.M.Y..... | .....A.....   | .....       | [4400] |
| #L1Lx_I      | C..A...T.G  | .....C..... | .....T.....   | .....G.....T..... | .....        | .....G.V.....   | .....A.....   | .....       | [4400] |
| #L1Lx_III    | C..A...T.G  | .....C..... | .....T.....   | .....G.....T..... | .....GR..... | .....T.G.A..... | .....A.....   | .....       | [4400] |
| #L1Lx_II     | C..A...T.G  | .....C..... | .....NT.....  | .....G.....T..... | .....G.....  | .....C.G.A..... | .....A.....   | .....       | [4400] |
| #L1Lx_IV     | C..A...T.G  | .....C..... | .....T.....   | .....G.....T..... | .....G.....  | .....C.G.A..... | .....A.....   | .....       | [4400] |
| #L1MdV_III   | C..A...T.G  | .....C..... | .....T.....   | .....G.....T..... | .....G.....  | .....C.G.A..... | .....A.....   | .....H..... | [4400] |

|              |               |                    |                |             |                   |                                |                   |             |        |
|--------------|---------------|--------------------|----------------|-------------|-------------------|--------------------------------|-------------------|-------------|--------|
| #L1MdA_I     | TTACCTATCC    | TAAATCAGAT         | AGGGGACTAA     | TATCCAACAT  | ATATAAGAA         | CTCAAGAAGG                     | TGGACTTCAG        | AAAATCAAAT  | [4480] |
| #L1MdA_II    | .....         | .....              | .....          | .....       | .....             | .....                          | .....             | .....       | [4480] |
| #L1MdA_III   | .....         | .....              | .....          | .....       | .....             | .....                          | .....             | .....       | [4480] |
| #L1MdA_IV    | .....         | .....              | .....          | .....       | .....             | .....                          | .....             | .....       | [4480] |
| #L1MdGf_I    | .....         | .....              | .....          | .....       | .....             | .....                          | .....             | .....       | [4480] |
| #L1MdGf_II   | .....         | .....              | .....          | .....       | .....             | .....                          | .....             | .....       | [4480] |
| #L1MdTf_I    | .....         | .....              | .....          | .....       | .....             | .....                          | .....C.....       | .....       | [4480] |
| #L1MdTf_II   | .....         | .....              | .....          | .....       | .....             | .....                          | .....C.....       | .....       | [4480] |
| #L1MdTf_III  | .....         | .....              | .....          | .....       | .....             | .....                          | .....             | .....Y..... | [4480] |
| #L1MdA_V     | .....T.....   | .....              | .....          | .....T..... | .....             | .....G.....                    | .....C.....       | .....       | [4480] |
| #L1MdA_VI    | .....         | .....R.....        | .....          | .....T..... | .....             | .....                          | .....C.....       | .....       | [4480] |
| #L1MdF_V     | .....         | .....              | .....          | .....T..... | .....             | .....                          | .....C.....       | .....       | [4480] |
| #L1MdF_IV    | .....         | .....              | .....          | .....T..... | .....             | .....                          | .....C.....       | .....       | [4480] |
| #L1MdF_I     | .....         | .....C.....G.....  | .....          | .....T..... | .....             | .....                          | .....C.....       | .....       | [4480] |
| #L1MdF_II    | .....         | .....C.....G.....C | .....          | .....T..... | .....             | .....A.....C.....T.....        | .....             | .....       | [4480] |
| #L1MdF_III   | .....         | .....              | .....          | .....T..... | .....             | .....                          | .....C.....       | .....       | [4480] |
| #L1MdN_I     | .....T.....   | .....              | .....          | .....T..... | .....             | .....G.....                    | .....C.....       | .....       | [4480] |
| #L1MdA_VII   | .....         | .....              | .....          | .....T..... | .....             | .....                          | .....C.....       | .....       | [4480] |
| #L1MdMus_I   | .....A.....   | .....T.....        | .....          | .....T..... | .....C.....G..... | .....C.....A.....C.....        | .....T.....       | .....       | [4480] |
| #L1MdFanc_I  | .....A.....   | .....T.....        | .....          | .....T..... | .....C.....G..... | .....C.....                    | .....T.....       | .....       | [4480] |
| #L1MdV_I     | .....A.....   | .....              | .....          | .....T..... | .....             | .....V.....                    | .....C.....       | .....H..... | [4480] |
| #L1MdFanc_II | .....A.....   | .....C.....        | .....          | .....T..... | .....C.....       | .....C.....                    | .....C.....       | .....       | [4480] |
| #L1MdMus_II  | .....A.....   | .....              | .....          | .....W..... | .....             | .....V.....C.....              | .....C.....       | .....       | [4480] |
| #L1MdV_II    | .....HA.....  | .....GN.....       | .....V.....    | .....T..... | .....             | .....T.....                    | .....C.....       | .....Y..... | [4480] |
| #L1Lx_I      | .....A.....   | .....C.....        | .....D.....    | .....T..... | .....Y.....       | .....T.....D.....              | .....C.....       | .....Y..... | [4480] |
| #L1Lx_III    | .....A.C..... | .....C.....C.....  | .....AV.G..... | .....T..... | .....C.....       | .....T.....A.....C.....        | .....G.....H..... | .....       | [4480] |
| #L1Lx_II     | .....A.Y..... | .....C.....C.....  | .....A.G.....  | .....T..... | .....C.....       | .....N.....DT.....A.....C..... | .....G.....N..... | .....       | [4480] |
| #L1Lx_IV     | .....A.....   | .....C.....T.....  | .....A.G.....  | .....T..... | .....C.....       | .....T.....A.....C.....        | .....G.....C..... | .....       | [4480] |
| #L1MdV_III   | .....A.....   | .....C.....C.....  | .....A.G.....  | .....T..... | .....C.....       | .....T.....A.....C.....        | .....G.....C..... | .....       | [4480] |

|              |                   |              |                        |             |                    |                     |                    |                   |        |
|--------------|-------------------|--------------|------------------------|-------------|--------------------|---------------------|--------------------|-------------------|--------|
| #L1MdA_I     | AACCCCATTA        | AAAAATGGGG   | CTCAGAACTG             | AACAAAGAAT  | TCTCACCTGA         | GGAATACCGA          | ATGGCAGAGA         | AGCACTTGAA        | [4560] |
| #L1MdA_II    | .....             | .....        | .....                  | .....       | .....              | .....               | .....              | .....C.....       | [4560] |
| #L1MdA_III   | .....             | .....        | .....                  | .....       | .....              | .....               | .....              | .....C.....       | [4560] |
| #L1MdA_IV    | .....             | .....        | .....                  | .....       | .....              | .....               | .....              | .....C.....       | [4560] |
| #L1MdGf_I    | .....             | .....        | .....                  | .....       | .....              | .....               | .....              | .....C.....       | [4560] |
| #L1MdGf_II   | .....             | .....        | .....                  | .....       | .....              | .....               | .....              | .....C.....       | [4560] |
| #L1MdTf_I    | .....C.....       | .....        | .....                  | .....       | .....              | .....               | .....              | .....C.....       | [4560] |
| #L1MdTf_II   | .....C.....       | .....        | .....                  | .....       | .....              | .....               | .....              | .....C.....       | [4560] |
| #L1MdTf_III  | .....             | .....        | .....                  | .....       | .....              | .....               | .....              | .....C.....       | [4560] |
| #L1MdA_V     | .....C.....       | .....G.....  | .....G.....            | .....       | .....C.....        | .....               | .....A.....T.....  | .....A.....C..... | [4560] |
| #L1MdA_VI    | .....             | .....        | .....G..A.....         | .....       | .....              | .....               | .....T.....        | .....A.....C..... | [4560] |
| #L1MdF_V     | .....             | .....        | .....G..A.....         | .....       | .....              | .....               | .....T.....        | .....C.....       | [4560] |
| #L1MdF_IV    | .....             | .....        | .....G..A.....         | .....       | .....              | .....               | .....T.....        | .....C.....       | [4560] |
| #L1MdF_I     | .....             | .....        | .....G.....            | .....       | .....              | .....               | .....              | .....C.....       | [4560] |
| #L1MdF_II    | .....             | .....        | .....T.....            | .....       | .....C.....        | .....               | .....              | .....C.....       | [4560] |
| #L1MdF_III   | .....             | .....        | .....G.....            | .....       | .....              | .....               | .....              | .....C.....       | [4560] |
| #L1MdN_I     | .....G.....C..... | .....G.....  | .....G.....            | .....       | .....G.....        | .....               | .....A.....T.....  | .....A.....C..... | [4560] |
| #L1MdA_VII   | .....             | .....        | .....G..A.....         | .....       | .....              | .....               | .....T.....        | .....C.....       | [4560] |
| #L1MdMus_I   | .....             | .....        | TA.....G..A.....       | .....       | .....A.....        | .....               | .....G.....T.....  | .....             | [4560] |
| #L1MdFanc_I  | .....             | .....WB..... | TA.....G..A.....       | .....       | .....A.....        | .....               | .....T.....        | .....C.....       | [4560] |
| #L1MdV_I     | .....             | .....        | A.....G..A.....        | .....       | .....A.....        | .....Y.....         | .....T.....        | .....C.....       | [4560] |
| #L1MdFanc_II | .....             | .....        | TA.....G..A.....       | .....       | .....A.....        | .....               | .....T.....        | .....C.....       | [4560] |
| #L1MdMus_II  | .....Y.....       | .....V.....  | TA.....V..A.....       | .....D..... | .....H.....AV..... | .....               | .....T.....        | .....YC.....      | [4560] |
| #L1MdV_II    | .....T.....       | .....        | TA.....G..A.....       | .....       | .....A.....        | .....               | .....T.....        | .....C.R.....     | [4560] |
| #L1Lx_I      | .....T.....       | .....        | TA.....G..A.....       | .....V..... | .....A.....        | .....H.....         | .....T.....        | .....C.A.....     | [4560] |
| #L1Lx_III    | .....T.....       | .....        | R.....TA.....G..A..... | .....       | .....A.....        | .....H.....         | .....T.....        | .....C.A.....     | [4560] |
| #L1Lx_II     | .....T.....       | .....        | TA.....G..A.....       | .....       | .....A.....        | .....Y.....         | .....T.....        | .....C.A.....     | [4560] |
| #L1Lx_IV     | .....T.....       | .....        | AA.....G..A.....       | .....G..... | .....A.....        | .....ACT.A.....     | .....K.....TV..... | .....C.A.....     | [4560] |
| #L1MdV_III   | .....T.....       | .....        | R.....TA.....G..A..... | .....       | .....T.....A.....  | .....R.....T.A..... | .....T.....        | .....C.A.....     | [4560] |

|              |                        |                       |                       |                       |                       |                       |                        |                          |        |
|--------------|------------------------|-----------------------|-----------------------|-----------------------|-----------------------|-----------------------|------------------------|--------------------------|--------|
| #L1MdA_I     | AAAATGTTCA             | ACATCCTTAA            | TCATCAGGGA            | AATGCAAATC            | AAAACAACCC            | TGAGATTCCA            | CCTCACACCA             | GTCAGAATGG               | [4640] |
| #L1MdA_II    |                        |                       |                       |                       |                       |                       |                        |                          | [4640] |
| #L1MdA_III   |                        |                       |                       |                       |                       |                       |                        |                          | [4640] |
| #L1MdA_IV    |                        |                       |                       |                       |                       |                       |                        |                          | [4640] |
| #L1MdGf_I    | . . . . . C . . . . .  |                       |                       |                       |                       |                       |                        |                          | [4640] |
| #L1MdGf_II   |                        |                       |                       |                       |                       |                       |                        |                          | [4640] |
| #L1MdTf_I    |                        |                       |                       |                       |                       |                       |                        | . . . . . G . . . . .    | [4640] |
| #L1MdTf_II   |                        |                       |                       |                       |                       |                       |                        | . . . . . G . . . . .    | [4640] |
| #L1MdTf_III  |                        |                       |                       |                       |                       |                       |                        | . . . . . T . . . . .    | [4640] |
| #L1MdA_V     |                        |                       | . . . . . A . . . . . |                       |                       |                       | . . . . . T . . . . .  |                          | [4640] |
| #L1MdA_VI    |                        | . . . . . G . . . . . |                       |                       |                       |                       | . . . . . T . . . . .  |                          | [4640] |
| #L1MdF_V     |                        | . . . . . G . . . . . |                       |                       |                       |                       | . . . . . Y . . . . .  |                          | [4640] |
| #L1MdF_IV    |                        | . . . . . R . . . . . |                       |                       |                       |                       |                        |                          | [4640] |
| #L1MdF_I     |                        |                       |                       |                       | . . . . . A . . . . . |                       | . . . . . T . . . . .  | . . . . . T . . . . .    | [4640] |
| #L1MdF_II    |                        |                       |                       |                       |                       |                       |                        |                          | [4640] |
| #L1MdF_III   |                        |                       |                       |                       |                       |                       |                        |                          | [4640] |
| #L1MdN_I     |                        |                       | . . . . . A . . . . . |                       |                       |                       | . . . . . T . . . . .  |                          | [4640] |
| #L1MdA_VII   | . . . . . Y . . . . .  | . . . . . G . . . . . | . . . . . A . . . . . |                       |                       |                       | . . . . . T . . . . .  |                          | [4640] |
| #L1MdMus_I   |                        |                       |                       |                       |                       |                       |                        |                          | [4640] |
| #L1MdFanc_I  |                        |                       |                       |                       | . . . . . T . . . . . |                       |                        |                          | [4640] |
| #L1MdV_I     |                        |                       |                       |                       |                       |                       |                        |                          | [4640] |
| #L1MdFanc_II |                        |                       |                       |                       |                       |                       |                        |                          | [4640] |
| #L1MdMus_II  |                        |                       |                       |                       |                       |                       |                        | . . . . . H . . . . .    | [4640] |
| #L1MdV_II    |                        |                       |                       |                       |                       |                       |                        |                          | [4640] |
| #L1Lx_I      | . . . . . R . . . . .  | . . . . . Y . . . . . | . . . . . R . . . . . |                       |                       |                       | . . . . . B . . . . .  |                          | [4640] |
| #L1Lx_III    | . . . . . G . . . . .  | . . . . . G . . . . . |                       |                       |                       |                       |                        |                          | [4640] |
| #L1Lx_II     | . . . . . G . . . . .  |                       | . . . . . N . . . . . |                       |                       |                       | . . . . . H . . . . .  |                          | [4640] |
| #L1Lx_IV     | . . . . . G . . . . .  |                       | . . . . . G . . . . . |                       | . . . . . D . . . . . |                       |                        |                          | [4640] |
| #L1MdV_III   | . . . . . G . . . . .  | . . . . . G . . . . . |                       |                       |                       |                       |                        |                          | [4640] |
|              |                        |                       |                       |                       |                       |                       |                        |                          |        |
| #L1MdA_I     | CTAAGATCAA             | AAATTCAGGT            | GACAGCAGAT            | GCTGGCGAGG            | ATGTGGAGAA            | AGAGGAACAC            | TCCTCCATTG             | TTGGTGGGAG               | [4720] |
| #L1MdA_II    |                        |                       |                       | . . . . . T . . . . . |                       |                       |                        | . . . . . K . . . . .    | [4720] |
| #L1MdA_III   |                        |                       |                       | . . . . . T . . . . . |                       |                       |                        | . . . . . T . . . . .    | [4720] |
| #L1MdA_IV    |                        |                       |                       |                       |                       |                       |                        | . . . . . T . . . . .    | [4720] |
| #L1MdGf_I    |                        |                       |                       | . . . . . T . . . . . |                       |                       |                        | . . . . . T . . . . .    | [4720] |
| #L1MdGf_II   |                        |                       |                       | . . . . . T . . . . . |                       |                       |                        | . . . . . T . . . . .    | [4720] |
| #L1MdTf_I    |                        |                       |                       |                       |                       |                       |                        | . . . . . T . . . . .    | [4720] |
| #L1MdTf_II   |                        |                       |                       |                       |                       |                       |                        | . . . . . T . . . . .    | [4720] |
| #L1MdTf_III  |                        |                       |                       |                       |                       |                       |                        | . . . . . T . . . . .    | [4720] |
| #L1MdA_V     |                        |                       |                       |                       |                       |                       |                        | . . . . . T . . . . .    | [4720] |
| #L1MdA_VI    |                        |                       |                       |                       |                       |                       |                        | . . . . . T . . . . .    | [4720] |
| #L1MdF_V     |                        |                       | . . . . . H . . . . . |                       |                       |                       |                        | . . . . . T . . . . .    | [4720] |
| #L1MdF_IV    |                        |                       |                       |                       |                       |                       |                        | . . . . . T . . . . .    | [4720] |
| #L1MdF_I     |                        | . . . . . C . . . . . |                       |                       |                       | . . . . . G . . . . . |                        | . . . . . T . . . . .    | [4720] |
| #L1MdF_II    | . . . . . S . . . . .  |                       |                       |                       |                       |                       |                        | . . . . . T . . . . .    | [4720] |
| #L1MdF_III   |                        |                       |                       |                       |                       |                       |                        | . . . . . T . . . . .    | [4720] |
| #L1MdN_I     |                        |                       |                       |                       |                       |                       |                        | . . . . . T . . . . .    | [4720] |
| #L1MdA_VII   |                        |                       |                       |                       |                       |                       | . . . . . Y . . . . .  | . . . . . T . . . . .    | [4720] |
| #L1MdMus_I   | . . . . . G . . . . .  |                       |                       |                       |                       |                       |                        | . . . . . C . . . . .    | [4720] |
| #L1MdFanc_I  |                        |                       |                       |                       |                       |                       |                        | . . . . . C . . . . .    | [4720] |
| #L1MdV_I     |                        |                       |                       |                       |                       |                       |                        | . . . . . T . . . . .    | [4720] |
| #L1MdFanc_II |                        |                       |                       |                       | . . . . . D . . . . . |                       |                        | . . . . . C . . . . .    | [4720] |
| #L1MdMus_II  |                        |                       |                       | . . . . . R . . . . . |                       | . . . . . R . . . . . |                        | . . . . . Y . . . . .    | [4720] |
| #L1MdV_II    |                        | . . . . . C . . . . . |                       |                       |                       | . . . . . R . . . . . |                        | . . . . . C . . . . .    | [4720] |
| #L1Lx_I      | . . . . . M . . . . .  | . . . . . C . . . . . |                       |                       |                       |                       |                        | . . . . . C . . . . .    | [4720] |
| #L1Lx_III    |                        | . . . . . C . . . . . |                       |                       |                       |                       |                        | . . . . . H . . . . .    | [4720] |
| #L1Lx_II     |                        | . . . . . C . . . . . |                       |                       | . . . . . V . . . . . |                       |                        | . . . . . Y . . . . .    | [4720] |
| #L1Lx_IV     |                        | . . . . . C . . . . . |                       | . . . . . A . . . . . |                       |                       |                        | . . . . . H . . . . .    | [4720] |
| #L1MdV_III   |                        | . . . . . C . . . . . | . . . . . R . . . . . |                       |                       |                       |                        | . . . . . Y . . . . .    | [4720] |
|              |                        |                       |                       |                       |                       |                       |                        |                          |        |
| #L1MdA_I     | TGCAGGCTTG             | TACAACCACT            | CTGGAATCA             | GTCTGGCGGT            | TCCTCAGAAA            | ACTGGACATA            | GTACTACCGG             | AGGATCCAGC               | [4800] |
| #L1MdA_II    |                        |                       |                       |                       |                       | . . . . . T . . . . . |                        | . . . . . [4800]         |        |
| #L1MdA_III   |                        |                       |                       |                       |                       | . . . . . T . . . . . |                        | . . . . . [4800]         |        |
| #L1MdA_IV    |                        |                       |                       |                       |                       | . . . . . T . . . . . |                        | . . . . . [4800]         |        |
| #L1MdGf_I    |                        |                       | . . . . . G . . . . . |                       |                       | . . . . . T . . . . . |                        | . . . . . [4800]         |        |
| #L1MdGf_II   |                        |                       |                       |                       |                       | . . . . . T . . . . . |                        | . . . . . [4800]         |        |
| #L1MdTf_I    |                        |                       |                       |                       |                       | . . . . . T . . . . . |                        | . . . . . [4800]         |        |
| #L1MdTf_II   |                        |                       |                       |                       |                       | . . . . . T . . . . . |                        | . . . . . [4800]         |        |
| #L1MdTf_III  |                        |                       | . . . . . C . . . . . |                       |                       | . . . . . T . . . . . |                        | . . . . . [4800]         |        |
| #L1MdA_V     | . . . . . A . . . . .  |                       |                       |                       |                       | . . . . . T . . . . . |                        | . . . . . H . . . . .    | [4800] |
| #L1MdA_VI    | . . . . . A . . . . .  |                       |                       |                       |                       | . . . . . T . . . . . | . . . . . R . . . . .  | . . . . . C . . . . .    | [4800] |
| #L1MdF_V     | . . . . . A . . . . .  |                       |                       |                       |                       | . . . . . T . . . . . |                        | . . . . . C . . . . .    | [4800] |
| #L1MdF_IV    | . . . . . A . . . . .  |                       |                       |                       |                       | . . . . . T . . . . . |                        | . . . . . C . . . . .    | [4800] |
| #L1MdF_I     | . . . . . A . . . . .  |                       |                       |                       |                       | . . . . . T . . . . . |                        | . . . . . C . . . . .    | [4800] |
| #L1MdF_II    | . . . . . A . . . . .  |                       |                       |                       |                       | . . . . . T . . . . . | . . . . . R . . . . .  | . . . . . [4800]         |        |
| #L1MdF_III   | . . . . . A . . . . .  |                       |                       |                       |                       | . . . . . T . . . . . |                        | . . . . . R . . . . .    | [4800] |
| #L1MdN_I     | . . . . . A . . . . .  |                       |                       |                       |                       | . . . . . T . . . . . |                        | . . . . . C . . . . .    | [4800] |
| #L1MdA_VII   | . . . . . A . . . . .  |                       |                       |                       |                       | . . . . . T . . . . . | . . . . . G . . . . .  | . . . . . C . . . . .    | [4800] |
| #L1MdMus_I   | . . . . . A . . . . .  | . . . . . K . . . . . |                       |                       |                       |                       |                        | . . . . . V TA . . . . . | [4800] |
| #L1MdFanc_I  | . . . . . A . . . . .  |                       | . . . . . G . . . . . |                       |                       | . . . . . T . . . . . | . . . . . A . . . . .  | . . . . . [4800]         |        |
| #L1MdV_I     | . . . . . A . . . . .  |                       |                       |                       |                       | . . . . . T . . . . . |                        | . . . . . [4800]         |        |
| #L1MdFanc_II | . . . . . A . . . . .  | . . . . . G . . . . . |                       |                       |                       | . . . . . T . . . . . |                        | . . . . . A . . . . .    | [4800] |
| #L1MdMus_II  | . . . . . AD . . . . . | . . . . . K . . . . . |                       |                       |                       | . . . . . T . . . . . | . . . . . Y . . . . .  | . . . . . R . . . . .    | [4800] |
| #L1MdV_II    | . . . . . A . . . . .  | . . . . . G . . . . . |                       | . . . . . T . . . . . |                       | . . . . . T . . . . . |                        | . . . . . A . . . . .    | [4800] |
| #L1Lx_I      | . . . . . A . . . . .  | . . . . . G . . . . . |                       | . . . . . T . . . . . |                       | . . . . . T . . . . . | . . . . . GD . . . . . | . . . . . R . . . . .    | [4800] |
| #L1Lx_III    | . . . . . A . . . . .  | . . . . . G . . . . . |                       | . . . . . T . . . . . |                       | . . . . . T . . . . . | . . . . . R . . . . .  | . . . . . YC . . . . .   | [4800] |
| #L1Lx_II     | . . . . . A . . . . .  | . . . . . G . . . . . | . . . . . H . . . . . |                       |                       | . . . . . T . . . . . | . . . . . D . . . . .  | . . . . . T . . . . .    | [4800] |
| #L1Lx_IV     | . . . . . A . . . . .  | . . . . . G . . . . . |                       |                       |                       | . . . . . T . . . . . |                        | . . . . . T . . . . .    | [4800] |
| #L1MdV_III   | . . . . . A . . . . .  | . . . . . G . . . . . |                       | . . . . . T . . . . . | . . . . . V . . . . . | . . . . . T . . . . . |                        | . . . . . T . . . . .    | [4800] |





#L1MdA\_I GTAGAGACTG CCATAGCCAG GGATCCACCC CATAATCAGC ATCCAAACGC TGACACCATT GCATACACTA GCAAGATTTT [5360]
#L1MdA\_II . . . . . T . . . . . [5360]
#L1MdA\_III . . . . . T . . . . . [5360]
#L1MdA\_IV S . . . . . T . . . . . [5360]
#L1MdGf\_I . . . . . C . . . . . A . . . . . T . . . . . G . . . . . T . . . . . T . . . . . T . . . . . A . . . . . [5360]
#L1MdGf\_II . . . . . K . . . . . T . . . . . [5360]
#L1MdTf\_I . . . . . T . . . . . [5360]
#L1MdTf\_II . . . . . T . . . . . [5360]
#L1MdTf\_III . . . . . T . . . . . T . . . . . [5360]
#L1MdA\_V C . . . . . T . . . . . T . . . . . T . . . . . C . . . . . A . . . . . CC . . . . . [5360]
#L1MdA\_VI C . . . . . T . . . . . T . . . . . T . . . . . C . . . . . [5360]
#L1MdF\_V C . . . . . Y . . . . . G . . . . . T . . . . . C . . . . . [5360]
#L1MdF\_IV C . . . . . C . . . . . G . . . . . T . . . . . C . . . . . [5360]
#L1MdF\_I C . . . . . T . . . . . T . . . . . TG . . . . . T . . . . . T . . . . . T . . . . . Y . . . . . [5360]
#L1MdF\_II C . . . . . T . . . . . T . . . . . A . . . . . T . . . . . G . . . . . T . . . . . [5360]
#L1MdF\_III C . . . . . T . . . . . G . . . . . T . . . . . T . . . . . Y . . . . . [5360]
#L1MdN\_I C . . . . . T . . . . . T . . . . . T . . . . . T . . . . . C . . . . . G . . . . . A . . . . . CC . . . . . [5360]
#L1MdA\_VII C . . . . . T . . . . . T . . . . . T . . . . . T . . . . . C . . . . . A . . . . . CG . . . . . [5360]
#L1MdMus\_I CC . . . . . CC . . . . . C . . . . . G . . . . . G . . . . . T . . . . . CA . . . . . A . . . . . T . . . . . TG . . . . . C . . . . . [5360]
#L1MdFanc\_I CC . . . . . A . . . . . CC . . . . . C . . . . . G . . . . . T . . . . . CA . . . . . C . . . . . A . . . . . T . . . . . TG . . . . . C . . . . . [5360]
#L1MdV\_I CC . . . . . GC . . . . . C . . . . . G . . . . . T . . . . . CA . . . . . A . . . . . T . . . . . TG . . . . . C . . . . . [5360]
#L1MdFanc\_II CC . . . . . CC . . . . . C . . . . . G . . . . . T . . . . . A . . . . . A . . . . . D . . . . . CA . . . . . C . . . . . A . . . . . T . . . . . TG . . . . . C . . . . . [5360]
#L1MdMus\_II CC . . . . . D . . . . . Y . . . . . C . . . . . C . . . . . G . . . . . B . . . . . T . . . . . TA . . . . . A . . . . . CA . . . . . YN . . . . . A . . . . . Y . . . . . T . . . . . TG . . . . . C . . . . . A . . . . . [5360]
#L1MdV\_II CC . . . . . CB . . . . . CHTG . . . . . T . . . . . A . . . . . A . . . . . CA . . . . . C . . . . . AR . . . . . T . . . . . D . . . . . H . . . . . G . . . . . TG . . . . . C . . . . . A . . . . . GCH . . . . . [5360]
#L1Lx\_I CC . . . . . CC . . . . . C . . . . . TG . . . . . T . . . . . A . . . . . A . . . . . CA . . . . . C . . . . . A . . . . . T . . . . . H . . . . . G . . . . . TD . . . . . C . . . . . A . . . . . KY . . . . . [5360]
#L1Lx\_III CC . . . . . CC . . . . . C . . . . . TG . . . . . T . . . . . TA . . . . . A . . . . . CA . . . . . C . . . . . A . . . . . NT . . . . . TGG . . . . . TG . . . . . C . . . . . A . . . . . TGC . . . . . [5360]
#L1Lx\_II CC . . . . . N . . . . . Y . . . . . CC . . . . . CVTG . . . . . T . . . . . Y . . . . . TA . . . . . T . . . . . YA . . . . . C . . . . . A . . . . . T . . . . . TGG . . . . . TGHC . . . . . AS . . . . . TGC . . . . . [5360]
#L1Lx\_IV CC . . . . . Y . . . . . CC . . . . . C . . . . . TG . . . . . T . . . . . TA . . . . . Y . . . . . CA . . . . . C . . . . . G . . . . . GYT . . . . . TGG . . . . . TG . . . . . C . . . . . G . . . . . TGC . . . . . [5360]
#L1MdV\_III CC . . . . . T . . . . . CC . . . . . C . . . . . TG . . . . . T . . . . . TA . . . . . T . . . . . TA . . . . . C . . . . . A . . . . . T . . . . . TGG . . . . . TG . . . . . C . . . . . AG . . . . . TGCA . . . . . [5360]

#L1MdA\_I ATTGAAAGGA CGCAGATGTA GCTGTCTCTT GTGAGACTAT GCCGGGGCCC AGCAAACACA GAAGTGGATG CTCACAGTCA [5440]
#L1MdA\_II . . . . . C . . . . . [5440]
#L1MdA\_III . . . . . C . . . . . [5440]
#L1MdA\_IV . . . . . C . . . . . [5440]
#L1MdGf\_I GC . . . . . C . . . . . T . . . . . A . . . . . G . . . . . T . . . . . T . . . . . G . . . . . [5440]
#L1MdGf\_II . . . . . C . . . . . [5440]
#L1MdTf\_I . . . . . C . . . . . [5440]
#L1MdTf\_II . . . . . C . . . . . [5440]
#L1MdTf\_III . . . . . C . . . . . [5440]
#L1MdA\_V G . . . . . C . . . . . CGT . . . . . A . . . . . Y . . . . . G . . . . . [5440]
#L1MdA\_VI GC . . . . . C . . . . . T . . . . . A . . . . . K . . . . . [5440]
#L1MdF\_V GC . . . . . C . . . . . W . . . . . A . . . . . R . . . . . [5440]
#L1MdF\_IV GC . . . . . C . . . . . T . . . . . A . . . . . D . . . . . [5440]
#L1MdF\_I GC . . . . . C . . . . . [5440]
#L1MdF\_II GC . . . . . C . . . . . [5440]
#L1MdF\_III GC . . . . . C . . . . . [5440]
#L1MdN\_I G . . . . . C . . . . . GT . . . . . A . . . . . C . . . . . G . . . . . [5440]
#L1MdA\_VII GC . . . . . C . . . . . T . . . . . A . . . . . G . . . . . T . . . . . T . . . . . [5440]
#L1MdMus\_I GC . . . . . C . . . . . T . . . . . A . . . . . C . . . . . G . . . . . T . . . . . G . . . . . T . . . . . [5440]
#L1MdFanc\_I GC . . . . . G . . . . . C . . . . . T . . . . . N . . . . . A . . . . . G . . . . . A . . . . . T . . . . . G . . . . . T . . . . . [5440]
#L1MdV\_I GC . . . . . C . . . . . T . . . . . A . . . . . G . . . . . A . . . . . T . . . . . G . . . . . T . . . . . [5440]
#L1MdFanc\_II GC . . . . . C . . . . . T . . . . . A . . . . . G . . . . . A . . . . . T . . . . . G . . . . . T . . . . . [5440]
#L1MdMus\_II GC . . . . . C . . . . . T . . . . . YA . . . . . V . . . . . G . . . . . ART . . . . . T . . . . . G . . . . . T . . . . . B . . . . . [5440]
#L1MdV\_II NC . . . . . C . . . . . GC . . . . . T . . . . . A . . . . . V . . . . . C . . . . . A . . . . . R . . . . . V . . . . . C . . . . . D . . . . . A . . . . . T . . . . . TR . . . . . T . . . . . GR . . . . . T . . . . . R . . . . . [5440]
#L1Lx\_I GC . . . . . C . . . . . GC . . . . . T . . . . . A . . . . . C . . . . . A . . . . . R . . . . . G . . . . . C . . . . . A . . . . . T . . . . . GR . . . . . T . . . . . [5440]
#L1Lx\_III GC . . . . . C . . . . . GC . . . . . T . . . . . A . . . . . C . . . . . A . . . . . R . . . . . G . . . . . C . . . . . D . . . . . A . . . . . TR . . . . . T . . . . . GA . . . . . T . . . . . G . . . . . T . . . . . C . . . . . [5440]
#L1Lx\_II GC . . . . . C . . . . . D . . . . . GC . . . . . T . . . . . A . . . . . BC . . . . . A . . . . . G . . . . . C . . . . . D . . . . . A . . . . . TR . . . . . T . . . . . GA . . . . . T . . . . . D . . . . . B . . . . . N . . . . . C . . . . . [5440]
#L1Lx\_IV GC . . . . . T . . . . . R . . . . . GC . . . . . T . . . . . A . . . . . G . . . . . C . . . . . A . . . . . A . . . . . G . . . . . C . . . . . A . . . . . A . . . . . T . . . . . GA . . . . . T . . . . . G . . . . . C . . . . . [5440]
#L1MdV\_III GC . . . . . C . . . . . T . . . . . A . . . . . G . . . . . C . . . . . A . . . . . D . . . . . CC . . . . . A . . . . . A . . . . . T . . . . . TA . . . . . T . . . . . G . . . . . C . . . . . Y . . . . . G . . . . . C . . . . . [5440]

#L1MdA\_I GCTAATGGAT GGATCATAGG G-CTCCCAAT GGAGGAGCTA GAGAAAGTAG CCAAGGAGCT AAAGGGATCT GCAACCTAT [5520]
#L1MdA\_II . . . . . [5520]
#L1MdA\_III . . . . . C . . . . . W . . . . . [5520]
#L1MdA\_IV . . . . . D . . . . . C . . . . . [5520]
#L1MdGf\_I . . . . . T . . . . . C . . . . . T . . . . . C . . . . . A . . . . . C . . . . . A . . . . . [5520]
#L1MdGf\_II . . . . . C . . . . . [5520]
#L1MdTf\_I . . . . . C . . . . . [5520]
#L1MdTf\_II . . . . . C . . . . . [5520]
#L1MdTf\_III . . . . . C . . . . . [5520]
#L1MdA\_V A . . . . . T . . . . . C . . . . . C . . . . . [5520]
#L1MdA\_VI . . . . . T . . . . . C . . . . . C . . . . . [5520]
#L1MdF\_V . . . . . T . . . . . C . . . . . C . . . . . [5520]
#L1MdF\_IV . . . . . T . . . . . C . . . . . C . . . . . [5520]
#L1MdF\_I . . . . . T . . . . . G . . . . . C . . . . . C . . . . . C . . . . . T . . . . . C . . . . . A . . . . . [5520]
#L1MdF\_II . . . . . T . . . . . A . . . . . C . . . . . C . . . . . C . . . . . A . . . . . C . . . . . A . . . . . [5520]
#L1MdF\_III . . . . . T . . . . . C . . . . . C . . . . . [5520]
#L1MdN\_I A . . . . . T . . . . . C . . . . . C . . . . . [5520]
#L1MdA\_VII . . . . . T . . . . . C . . . . . C . . . . . [5520]
#L1MdMus\_I T . . . . . TA . . . . . A . . . . . C . . . . . C . . . . . T . . . . . VV . . . . . G . . . . . G . . . . . [5520]
#L1MdFanc\_I T . . . . . TAV . . . . . A . . . . . C . . . . . C . . . . . A . . . . . C . . . . . C . . . . . G . . . . . G . . . . . [5520]
#L1MdV\_I . . . . . T . . . . . A . . . . . C . . . . . C . . . . . [5520]
#L1MdFanc\_II T . . . . . T . . . . . A . . . . . C . . . . . C . . . . . D . . . . . C . . . . . N . . . . . G . . . . . [5520]
#L1MdMus\_II T . . . . . T . . . . . DA . . . . . C . . . . . C . . . . . Y . . . . . D . . . . . C . . . . . R . . . . . R . . . . . D . . . . . [5520]
#L1MdV\_II T . . . . . C . . . . . T . . . . . G . . . . . C . . . . . D . . . . . TC . . . . . A . . . . . [5520]
#L1Lx\_I T . . . . . Y . . . . . T . . . . . C . . . . . G . . . . . C . . . . . TC . . . . . A . . . . . [5520]
#L1Lx\_III A . . . . . C . . . . . T . . . . . G . . . . . C . . . . . D . . . . . TC . . . . . R . . . . . [5520]
#L1Lx\_II D . . . . . C . . . . . T . . . . . G . . . . . C . . . . . N . . . . . TC . . . . . B . . . . . [5520]
#L1Lx\_IV A . . . . . C . . . . . T . . . . . BC . . . . . C . . . . . V . . . . . GTC . . . . . WD . . . . . [5520]
#L1MdV\_III A . . . . . C . . . . . T . . . . . G . . . . . CG . . . . . TC . . . . . A . . . . . T . . . . . [5520]

|              |             |             |               |                    |            |                |            |                       |       |        |        |
|--------------|-------------|-------------|---------------|--------------------|------------|----------------|------------|-----------------------|-------|--------|--------|
| #L1MdA_I     | AGGTGGAACA  | ACATTATGAG  | CTAACCAGTA    | CCCC-----          | -----      | -----          | -----      | -----                 | ----- | G      | [5600] |
| #L1MdA_II    | .....       | .....A      | .....         | .....              | -----      | -----          | -----      | -----                 | ----- | .      | [5600] |
| #L1MdA_III   | .....       | .....A      | .....         | .....              | -----      | -----          | -----      | -----                 | ----- | .      | [5600] |
| #L1MdA_IV    | .....       | .....A      | .....         | .....              | -----      | -----          | -----      | -----                 | ----- | .      | [5600] |
| #L1MdGf_I    | .....       | .....A      | .....         | .....              | -----      | -----          | -----      | -----                 | ----- | .      | [5600] |
| #L1MdGf_II   | ...C.....   | .....A      | .....         | Y.....             | -----      | -----          | -----      | -----                 | ----- | .      | [5600] |
| #L1MdTf_I    | .....       | .....A      | .....         | .....              | -----      | -----          | -----      | -----                 | ----- | T      | [5600] |
| #L1MdTf_II   | .....       | .....A      | .....         | .....              | -----      | -----          | -----      | -----                 | ----- | T      | [5600] |
| #L1MdTf_III  | .....T..... | .....A      | .....         | .....              | -----      | -----          | -----      | -----                 | ----- | .      | [5600] |
| #L1MdA_V     | H.....      | .....A      | .....         | .....              | -----      | -----          | -----      | -----                 | ----- | A      | [5600] |
| #L1MdA_VI    | .....       | .....A      | .....         | .....              | -----      | -----          | -----      | -----                 | ----- | .      | [5600] |
| #L1MdF_V     | .....       | ..A..A      | .....         | ..CC---            | -----      | -----          | -----      | -----                 | ----- | .      | [5600] |
| #L1MdF_IV    | .....       | ..A..A      | .....         | ..CC---            | -----      | -----          | -----      | -----                 | ----- | .      | [5600] |
| #L1MdF_I     | .....       | ..A..A      | .....         | ..G---             | -----      | -----          | -----      | -----                 | ----- | .      | [5600] |
| #L1MdF_II    | .....       | ..A..A      | ..G.....      | .....              | -----      | -----          | -----      | -----                 | ----- | .      | [5600] |
| #L1MdF_III   | .....       | .....A      | .....         | .....              | -----      | -----          | -----      | -----                 | ----- | D      | [5600] |
| #L1MdN_I     | C..A.....   | .....A      | .....         | .....              | -----      | -----          | -----      | -----                 | ----- | A      | [5600] |
| #L1MdA_VII   | ....C....   | .....A      | .....         | .....              | -----      | -----          | -----      | -----                 | ----- | .      | [5600] |
| #L1MdMus_I   | .....       | ..A..A      | ..Y.....      | ..C---             | -----      | -----          | -----      | -----                 | ----- | A      | [5600] |
| #L1MdFanc_I  | .....       | ..A..A      | .....         | ..C---             | -----      | -----          | -----      | -----                 | ----- | A      | [5600] |
| #L1MdV_I     | .....       | ..A..A      | .....         | ..C---             | -----      | -----          | -----      | -----                 | ----- | A      | [5600] |
| #L1MdFanc_II | ....A....   | ..A..A      | .....         | ..CHC---           | -----      | -----          | -----      | -----                 | ----- | CA     | [5600] |
| #L1MdMus_II  | ....A.D.... | ..A..A      | .....         | ..H..CC---         | -----      | -----          | -----      | -----                 | ----- | A      | [5600] |
| #L1MdV_II    | ....A.....  | N..A...A    | .....         | H...CAGAGC         | TCCTTGGAAC | TAAACCACCA     | ATCAAAGAAA | ACACATGGTR            |       | [5600] |        |
| #L1Lx_I      | .D.A...V..  | ..A..A      | .....         | ..CAGAGC           | TCCTTGGAC  | TAAACCACCA     | ATCAAAGAAA | ACACATGGT.            |       | [5600] |        |
| #L1Lx_III    | ..A.....    | -..A...A    | ..C.....      | ..CAGAGC           | TCCCAGGGAC | TAAACCACCA     | ACCAAAGAGT | ACACATGGA.            |       | [5600] |        |
| #L1Lx_II     | ..A.....    | ..D...A     | ..C.....      | H...CAGAGC         | TCCCAGGDAC | TAAACCACCA     | ACNAACGAGT | ACACATGGA.            |       | [5600] |        |
| #L1Lx_IV     | D.AG...G..  | ..G.G.C.A   | ..AGG...DAH   | H...CAGAGC         | TCCCAGGGAC | TGGGCCACCA     | ACCAAAGART | ACACATGGA.            |       | [5600] |        |
| #L1MdV_III   | ...AA.....  | ..A...C.A   | ..C.....      | H...CAGAGC         | TCCCAGGGAC | TAAGCCATCA     | ACAAAGGAGT | ACACATGG--            |       | [5600] |        |
|              |             |             |               |                    |            |                |            |                       |       |        |        |
| #L1MdA_I     | GAGCTCTTGA  | CTCTAGCTGC  | ATATATATCA    | AAAGATGGCC         | TAGTCGGCCA | TCACTGGAAA     | GAGAGGCCCA | TTGGACTTGC            |       | [5680] |        |
| #L1MdA_II    | .....       | .....       | .....         | .....              | .....      | .....          | .....      | .....                 |       | [5680] |        |
| #L1MdA_III   | .....       | .....       | ..G.....      | .....              | .....      | .....          | .....      | .....AC..             |       | [5680] |        |
| #L1MdA_IV    | .....       | .....       | ..G.....      | .....              | .....      | .....          | .....      | .....AC..             |       | [5680] |        |
| #L1MdGf_I    | .....       | .....       | ..GC.....     | .....              | .....      | .....          | .....      | .....AC..             |       | [5680] |        |
| #L1MdGf_II   | .....       | .....       | ..G.....      | .....              | .....      | .....          | .....      | .....AC..             |       | [5680] |        |
| #L1MdTf_I    | .....       | .....       | ..G.....      | .....              | .....      | .....          | .....      | .....AC..             |       | [5680] |        |
| #L1MdTf_II   | .....       | .....       | ..G.....      | .....              | .....      | .....          | .....      | .....AC..             |       | [5680] |        |
| #L1MdTf_III  | .....       | .....       | ..G.....      | .....              | .....      | .....          | .....      | .....ACA.             |       | [5680] |        |
| #L1MdA_V     | .....       | .....       | ..G.....      | .....              | .....      | .....          | .....      | ...T.AG..             |       | [5680] |        |
| #L1MdA_VI    | .....       | .....       | ..G.....      | .....              | .....      | .....          | .....      | ...W....              |       | [5680] |        |
| #L1MdF_V     | ....G..T..  | .....       | ..G...G..     | ..G...G..          | .....      | ..K.....       | .....      | ...T.G....            |       | [5680] |        |
| #L1MdF_IV    | ....G..T..  | .....       | ..G...G..     | ..G...G..          | .....      | ..K.....       | .....      | ...T....              |       | [5680] |        |
| #L1MdF_I     | ....T.....  | T.....      | ..G...G..     | .....              | .....      | ..C.....       | .....      | .....                 |       | [5680] |        |
| #L1MdF_II    | ....T.....  | .....       | ..G...G..     | .....              | .....      | ..C.....       | .....      | .....                 |       | [5680] |        |
| #L1MdF_III   | .....       | .....       | ..G.....      | .....              | .....      | .....          | .....      | .....                 |       | [5680] |        |
| #L1MdN_I     | .....       | .....       | ..G.....      | .....              | ..A.....   | .....          | .....      | ...T.AG..             |       | [5680] |        |
| #L1MdA_VII   | .....       | .....       | ..G.....      | .....              | .....      | .....          | .....      | .....AC..             |       | [5680] |        |
| #L1MdMus_I   | ..R...R..T  | .....       | ..G...G..     | ..G...G..          | .....      | ..T...G..      | .....      | ..C...T..A..          |       | [5680] |        |
| #L1MdFanc_I  | ....G..T..  | .....       | ..G...G..     | ..G...G..          | .....      | ..Y...G..      | .....      | ..C...TH..            |       | [5680] |        |
| #L1MdV_I     | ....G..T..  | .....       | ..G...G..     | ..G...G..          | .....      | ..T...G..      | .....      | ..C...T....           |       | [5680] |        |
| #L1MdFanc_II | ....G..T..  | .....T..... | ..G...G..     | ..G...G..          | .....      | ..D...G..G     | .....      | ..-...T....           |       | [5680] |        |
| #L1MdMus_II  | ....-G..T.. | ....T.....  | ..G...G..     | ..G...G..          | .....      | ..D...G..G     | .....      | ..-...TH...Y          |       | [5680] |        |
| #L1MdV_II    | .DA..TD..G  | .....Y..... | ..G...G..     | ..G...G..          | .....      | ..NV..T..      | ..A...G..G | .....-..D..T..C..T    |       | [5680] |        |
| #L1Lx_I      | .GA...V..K  | .....       | ..G...G..     | ..G...G..          | .....      | ..Y...A...G..G | .....      | ..-...T..B..T         |       | [5680] |        |
| #L1Lx_III    | .GA.C.A..G  | ..C.....    | ..G...G..     | ..G...G..          | .....      | ..T..T..A..    | ..A...G..G | .....H...T..H..W      |       | [5680] |        |
| #L1Lx_II     | .GA.C.A..G  | ..C...C..   | ..G...G..     | ..G...G..          | .....      | ..T...D..      | ..A..DG..G | .....-...T..C..RT     |       | [5680] |        |
| #L1Lx_IV     | .NGA.C.A..G | ..D..G..G.. | ..G...G..     | ..G...G..          | .....      | ..T..T..A..    | ..G...G..G | .....-...N...G..C..A  |       | [5680] |        |
| #L1MdV_III   | -----       | ..C.....    | ..G...G..     | ..G...G..          | .....      | ..T...ATG..    | ..A...G..R | .....-...T...G..C..AT |       | [5680] |        |
|              |             |             |               |                    |            |                |            |                       |       |        |        |
| #L1MdA_I     | AAACTTTATA  | T----GCCCC  | AGTACAGGG     | AATACCAGG          | CCAAAAAGG  | GGAGTGGGTG     | GGCAGGGG-- | --AGTG----            |       | [5760] |        |
| #L1MdA_II    | .....       | -----       | ..CD.....     | .....              | .....      | .....          | .....      | -----                 |       | [5760] |        |
| #L1MdA_III   | .....       | -----       | ..CG.....     | .....              | .....      | .....          | ..T.....   | -----                 |       | [5760] |        |
| #L1MdA_IV    | ....G.....  | -----       | ..CG.....     | .....              | ..AAA      | AA.AAAT.G      | AATG..T.-- | --G..A----            |       | [5760] |        |
| #L1MdGf_I    | .....       | -----       | ..CG.....     | .....              | ..T...A..  | .....          | ..T.....   | ..A----               |       | [5760] |        |
| #L1MdGf_II   | .....       | -----       | ..CG.....     | .....              | .....      | ..KT.....      | .....      | ..K----               |       | [5760] |        |
| #L1MdTf_I    | .G...G.G    | -----       | G.....        | ..CG.....          | ..GG..     | .....          | ..T.....   | ..K----               |       | [5760] |        |
| #L1MdTf_II   | .G...G.G    | -----       | G.....        | ..CG.....          | ..GG..     | .....          | ..T.....   | -----                 |       | [5760] |        |
| #L1MdTf_III  | .....       | -----       | ..A.....      | ..CG.....          | .....      | ..C.....       | ..T.....   | -----                 |       | [5760] |        |
| #L1MdA_V     | .....       | -----       | ..CG.....     | .....              | ..AT..     | ..A.....       | ..T.....   | -----                 |       | [5760] |        |
| #L1MdA_VI    | .....       | -----       | ..CG.....     | .....              | ..T.....   | .....          | ..T.....   | -----                 |       | [5760] |        |
| #L1MdF_V     | .....       | ....T...Y.. | ..CG.....     | ..G...T..          | .....      | ..T.....       | ..T.G....  | -----                 |       | [5760] |        |
| #L1MdF_IV    | .....       | ....T.....  | ..CG.....     | ..G...T..          | .....      | ..K.....       | ..TV.....  | ....R.KK----          |       | [5760] |        |
| #L1MdF_I     | .....       | -----       | ..CG.....     | .....              | ..S.....   | .....          | ..T.....   | ..T....               |       | [5760] |        |
| #L1MdF_II    | .....       | -----       | ..CG.....     | .....              | .....      | .....          | ..T.....   | -----                 |       | [5760] |        |
| #L1MdF_III   | .....       | -----       | ..HG.....     | .....              | ..T.....   | .....          | ..T.....   | -----                 |       | [5760] |        |
| #L1MdN_I     | ..G.....    | -----       | ..CG.....     | .....              | ..AT..     | ..A.....       | ..T.....   | -----                 |       | [5760] |        |
| #L1MdA_VII   | .....       | -----       | ..CG.....     | .....              | ..T.....   | ..A.....       | ..T.....   | -----                 |       | [5760] |        |
| #L1MdMus_I   | .....       | -----       | ..CG.....     | .....              | ..G...T..  | ..A.....       | ..T.....   | ....CA----            |       | [5760] |        |
| #L1MdFanc_I  | .....       | -----       | ..G.....      | ..G...T..          | .....      | ..T.....       | .....      | ....CA----            |       | [5760] |        |
| #L1MdV_I     | .....       | -----       | ..C.....      | ..G...T..          | .....      | ..T.....       | .....      | ....C....             |       | [5760] |        |
| #L1MdFanc_II | G..GA.....  | -----       | ..G.....      | ..GG...CA          | .....      | .....          | ..TT.....  | ....CA----            |       | [5760] |        |
| #L1MdMus_II  | G..GA.Y...  | -----       | ..G.....      | ..D...GG...C       | .....      | ..D...TTD...   | .....      | ....CA----            |       | [5760] |        |
| #L1MdV_II    | G..GGN.C..  | -----       | ..T.....      | ..G...V...GGG...T  | .....      | ..TT...        | .....      | ....CA----            |       | [5760] |        |
| #L1Lx_I      | G..GG.C.C.. | -----       | ..H...T...    | ..G...C...GG...C   | .....      | ..TT.K...      | .....      | ....CA----            |       | [5760] |        |
| #L1Lx_III    | G..GGC.CD.  | -----       | ..H...D.GT..R | ..G...R...GGG...C  | .....      | ..TT.T...      | .....      | ....CA----            |       | [5760] |        |
| #L1Lx_II     | G..GGC.CR.  | -----       | ..K...GT..D   | ..G...NA...GGD...C | .....      | ..TTV.T...     | .....      | ....CA----            |       | [5760] |        |
| #L1Lx_IV     | G..GGD.G..  | ....TR....  | ..GT...G..    | ..BBB...AGG...GAC  | .....      | ..D.TG...      | .....      | ....CACCCT            |       | [5760] |        |
| #L1MdV_III   | G..GGC.CG.  | ..AGAT....  | ..GT...TG...  | ..GGG.G.T          | .....      | ..TG..T.GA     | GG.ACACCCT |                       |       | [5760] |        |



```

#L1MdA_I ----- GGG-----G TGGGTGGATA TGGGGGACT- ---TTGGTA TAGCATTGGA AATGTAAATG AGTTAAATAC [5840]
#L1MdA_II ----- . . . . . [5840]
#L1MdA_III ----- . . . . .G. . . . . [5840]
#L1MdA_IV ----- . . . . .AAGTGG. G. . . . .A. G. . . . . [5840]
#L1MdGf_I ----- . . . . .C. . . . . [5840]
#L1MdGf_II ----- . . . . .G. . . . . [5840]
#L1MdTf_I ----- . . . . .G. A. . . . . [5840]
#L1MdTf_II ----- . . . . .G. A. . . . . [5840]
#L1MdTf_III ----- . . . . .G. . . . . [5840]
#L1MdA_V ----- . . . . .G. . . . .A. G. G. . . . . [5840]
#L1MdA_VI ----- . . . . .GK. G. . . . .A. G. . . . . [5840]
#L1MdF_V ----- . . . . .G. G. . . . . [5840]
#L1MdF_IV ----- K. KGG----- G. . . . .G. . . . .K. T. . . . . [5840]
#L1MdF_I ----- . . . . .G. . . . .C- . . . . . [5840]
#L1MdF_II ----- . . . . .GT----- . . . . .G. . . . . [5840]
#L1MdF_III ----- . . . . .G----- . . . . .A. G. . . . . [5840]
#L1MdN_I ----- . . . . .G. . . . . [5840]
#L1MdA_VII ----- . . . . .G. . . . .A. G. . . . . [5840]
#L1MdMus_I ----- . . . . .CG----- G. . . . .A. G. . . . . [5840]
#L1MdFanc_I ----- . . . . .CG----- G. . . . .A. G. . . . . [5840]
#L1MdV_I ----- . . . . .DG----- G. . . . .A. G. . . . . [5840]
#L1MdFanc_II ----- . . . . .CG----- G. . . . .A. G. . . . . [5840]
#L1MdMus_II ----- . . . . .CG----- G. . . . .A. NG. . . . . [5840]
#L1MdV_II ----- . . . . .GGAGGN. GDA. G. . . . .G. . . . .ATTT- ---CGGA. GG G. AAC. A. . . . .G. GG. NAA CA. .TG. A. T [5840]
#L1Lx_I ----- . . . . .GGAGCG. G. A. GD. . . . .G. . . . .ATTT- ---CGGA. DG G. AAC. A. . . . .G. GG. TAA CA. .TG. A. T [5840]
#L1Lx_III ----- . . . . .DGDAGGG. DKABGR. . . . .G. . . . .TTT- ---CGGA. GG G. AACCA. . . . .G. GG. TAA YA. .TG. A. T [5840]
#L1Lx_II ----- . . . . .GGAGGNN RNAKG. . . . .GD. . . . .NTT- ---CGGADGG G. AABBA. . . . .G. GG. TAA CA. .TG. A. T [5840]
#L1Lx_IV ----- CATAGARGCA . . . . .GGACGG. C. ATG. . . . .G. . . . .TTTC- ---YAAA. GG G. .ACC. . . . .G. GG. AA CA. .TG. A. T [5840]
#L1MdV_III ----- CATAGAANCA . . . . .GGAGGRA G. ATGD. . . . .G. . . . .TTTCT DGGNGG. .GR G. AACNG. . . . .G. GG. TAA CA. .TG. A. T [5840]

```

```

#L1MdA_I CTAATAAAAA ATGGAAAAA A [5861]
#L1MdA_II . . . . . [5861]
#L1MdA_III . . . . . [5861]
#L1MdA_IV G. . . . .WWW. . . . . [5861]
#L1MdGf_I . . . . . [5861]
#L1MdGf_II . . . . .D. R. . . . . [5861]
#L1MdTf_I . . . . . [5861]
#L1MdTf_II . . . . .D. . . . . [5861]
#L1MdTf_III . . . . .G. . . . . [5861]
#L1MdA_V G. . . . .AAAW. W. . . . . [5861]
#L1MdA_VI . . . . .W. . . . .AWWWW. . . . . [5861]
#L1MdF_V . . . . .T. . . . .AAA. . . . . [5861]
#L1MdF_IV . . . . .T. . . . .AAA. . . . . [5861]
#L1MdF_I . . . . .W. . . . .AAA. . . . . [5861]
#L1MdF_II .CT. AT. . . . .AT. GG. . . . . [5861]
#L1MdF_III .CT. AT. . . . .AAA. . . . . [5861]
#L1MdN_I G. . . . .AAA. . . . . [5861]
#L1MdA_VII G. . . . .AAW. T. TTT. . . . . [5861]
#L1MdMus_I . . . . . [5861]
#L1MdFanc_I . . . . . [5861]
#L1MdV_I . . . . .WDD. . . . . [5861]
#L1MdFanc_II . . . . .AANH. NH. . . . . [5861]
#L1MdMus_II . . . . .WANAD. DDD. . . . . [5861]
#L1MdV_II G. . . . .AT. . . . .G. AAAT. TCT. . . . . [5861]
#L1Lx_I G. . . . .AT. . . . .G. AAAT. TCT. . . . . [5861]
#L1Lx_III G. . . . .AT. . . . .G. AAAT. TCT. . . . . [5861]
#L1Lx_II G. . . . .AT. . . . .G. AAAT. TCT. . . . . [5861]
#L1Lx_IV G. . . . .AT. . . . .G. AAAH. TVC. . . . . [5861]
#L1MdV_III B-. .AT. . . . .G. AAAT. BCC. . . . . [5861]

```
