# Supplementary material for: Revisiting the evolution of mouse LINE-1 in the genomic era
Source: PubMed Central journal article supplement (PMC3600994; doi:10.1186/1759-8753-4-3), 2013-01-03
Supplement: 1759-8753-4-3-S2.pdf [file 1759-8753-4-3-S2.pdf]

Supplementary material 2. Matrix of pairwise divergence based on the longest non-recombining fragment of ORFII (from position 2085 to 4489 in supplementary material 1)

|                  | [1]   | [2]   | [3]   | [4]   | [5]   | [6]   | [7]   | [8]   | [9]   | [10]  | [11]  | [12] | [13] | [14]  | [15]  | [16]  | [17]  | [18]  | [19] | [20] | [21] | [22] | [23] | [24] | [25] | [26] | [27] | [28] |  |
|------------------|-------|-------|-------|-------|-------|-------|-------|-------|-------|-------|-------|------|------|-------|-------|-------|-------|-------|------|------|------|------|------|------|------|------|------|------|--|
| [1] L1MdA_I      |       |       |       |       |       |       |       |       |       |       |       |      |      |       |       |       |       |       |      |      |      |      |      |      |      |      |      |      |  |
| [2] L1MdA_II     | 0.25  |       |       |       |       |       |       |       |       |       |       |      |      |       |       |       |       |       |      |      |      |      |      |      |      |      |      |      |  |
| [3] L1MdA_III    | 0.71  | 0.50  |       |       |       |       |       |       |       |       |       |      |      |       |       |       |       |       |      |      |      |      |      |      |      |      |      |      |  |
| [4] L1MdA_IV     | 1.52  | 1.31  | 0.97  |       |       |       |       |       |       |       |       |      |      |       |       |       |       |       |      |      |      |      |      |      |      |      |      |      |  |
| [5] L1MdGf_I     | 1.77  | 1.56  | 1.26  | 1.52  |       |       |       |       |       |       |       |      |      |       |       |       |       |       |      |      |      |      |      |      |      |      |      |      |  |
| [6] L1MdGf_II    | 0.88  | 0.59  | 0.25  | 0.97  | 1.43  |       |       |       |       |       |       |      |      |       |       |       |       |       |      |      |      |      |      |      |      |      |      |      |  |
| [7] L1MdTf_I     | 2.12  | 1.90  | 1.48  | 1.78  | 1.77  | 1.65  |       |       |       |       |       |      |      |       |       |       |       |       |      |      |      |      |      |      |      |      |      |      |  |
| [8] L1MdTf_II    | 2.16  | 1.95  | 1.52  | 1.78  | 1.82  | 1.69  | 0.04  |       |       |       |       |      |      |       |       |       |       |       |      |      |      |      |      |      |      |      |      |      |  |
| [9] L1MdTf_III   | 1.74  | 1.52  | 1.10  | 1.27  | 1.39  | 1.18  | 1.48  | 1.52  |       |       |       |      |      |       |       |       |       |       |      |      |      |      |      |      |      |      |      |      |  |
| [10] L1MdA_V     | 2.94  | 2.73  | 2.47  | 1.44  | 2.95  | 2.47  | 3.12  | 3.16  | 2.73  |       |       |      |      |       |       |       |       |       |      |      |      |      |      |      |      |      |      |      |  |
| [11] L1MdA_VI    | 3.39  | 3.17  | 3.00  | 1.78  | 3.39  | 2.99  | 3.83  | 3.83  | 3.26  | 1.99  |       |      |      |       |       |       |       |       |      |      |      |      |      |      |      |      |      |      |  |
| [12] L1MdF_V     | 4.23  | 4.01  | 3.83  | 2.73  | 4.32  | 3.83  | 4.76  | 4.76  | 4.01  | 2.90  | 1.05  |      |      |       |       |       |       |       |      |      |      |      |      |      |      |      |      |      |  |
| [13] L1MdF_IV    | 4.23  | 4.01  | 3.83  | 2.69  | 4.32  | 3.83  | 4.76  | 4.76  | 4.06  | 2.90  | 0.97  | 0.00 |      |       |       |       |       |       |      |      |      |      |      |      |      |      |      |      |  |
| [14] L1MdF_I     | 4.98  | 4.75  | 4.49  | 3.59  | 5.07  | 4.49  | 5.38  | 5.43  | 4.76  | 4.08  | 2.80  | 2.23 | 2.23 |       |       |       |       |       |      |      |      |      |      |      |      |      |      |      |  |
| [15] L1MdF_II    | 6.51  | 6.23  | 6.10  | 5.05  | 6.46  | 6.10  | 6.92  | 6.97  | 6.24  | 5.09  | 3.62  | 2.70 | 2.66 | 2.50  |       |       |       |       |      |      |      |      |      |      |      |      |      |      |  |
| [16] L1MdF_III   | 5.31  | 5.09  | 4.91  | 3.79  | 5.31  | 4.91  | 5.85  | 5.90  | 5.14  | 3.92  | 2.34  | 1.31 | 1.31 | 1.41  | 1.57  |       |       |       |      |      |      |      |      |      |      |      |      |      |  |
| [17] L1MdN_I     | 3.12  | 2.90  | 2.73  | 1.69  | 3.12  | 2.73  | 3.38  | 3.42  | 2.99  | 0.38  | 2.04  | 2.86 | 2.86 | 4.08  | 5.05  | 3.88  |       |       |      |      |      |      |      |      |      |      |      |      |  |
| [18] L1MdA_VII   | 2.77  | 2.56  | 2.30  | 1.10  | 2.77  | 2.30  | 3.12  | 3.12  | 2.56  | 1.27  | 0.67  | 1.61 | 1.56 | 2.93  | 4.19  | 2.82  | 1.48  |       |      |      |      |      |      |      |      |      |      |      |  |
| [19] L1MdMus_I   | 7.60  | 7.60  | 7.47  | 6.38  | 7.79  | 7.46  | 8.21  | 8.21  | 7.38  | 6.79  | 4.93  | 3.98 | 4.12 | 5.70  | 6.36  | 5.20  | 6.80  | 5.42  |      |      |      |      |      |      |      |      |      |      |  |
| [20] L1MdFanc_I  | 7.70  | 7.61  | 7.43  | 6.34  | 7.75  | 7.33  | 8.22  | 8.22  | 7.34  | 6.76  | 4.98  | 4.08 | 4.21 | 5.66  | 6.46  | 5.26  | 6.76  | 5.38  | 1.27 |      |      |      |      |      |      |      |      |      |  |
| [21] L1MdV_I     | 5.24  | 4.93  | 4.75  | 3.76  | 5.15  | 4.75  | 5.61  | 5.61  | 4.89  | 4.12  | 2.22  | 1.10 | 1.23 | 3.21  | 3.69  | 2.40  | 4.07  | 2.74  | 2.84 | 2.80 |      |      |      |      |      |      |      |      |  |
| [22] L1MdFanc_II | 6.77  | 6.64  | 6.46  | 5.48  | 6.87  | 6.46  | 7.33  | 7.33  | 6.60  | 5.84  | 4.17  | 3.06 | 3.19 | 4.66  | 5.27  | 4.18  | 5.89  | 4.61  | 1.96 | 1.91 | 1.75 |      |      |      |      |      |      |      |  |
| [23] L1MdMus_II  | 5.72  | 5.63  | 5.45  | 4.42  | 5.81  | 5.40  | 6.28  | 6.28  | 5.55  | 4.93  | 3.11  | 2.09 | 2.22 | 3.87  | 4.53  | 3.30  | 4.93  | 3.56  | 2.04 | 2.04 | 0.95 | 0.69 |      |      |      |      |      |      |  |
| [24] L1MdV_II    | 7.21  | 7.07  | 6.89  | 5.83  | 7.21  | 6.88  | 7.79  | 7.79  | 6.99  | 6.21  | 4.63  | 3.62 | 3.76 | 4.95  | 5.81  | 4.54  | 6.21  | 4.90  | 2.26 | 2.26 | 2.36 | 0.91 | 1.24 |      |      |      |      |      |  |
| [25] L1Lx_I      | 7.49  | 7.35  | 7.17  | 6.31  | 7.54  | 7.17  | 8.07  | 8.07  | 7.32  | 6.45  | 4.97  | 3.92 | 4.05 | 5.29  | 5.91  | 4.79  | 6.49  | 5.42  | 2.60 | 2.69 | 2.66 | 1.07 | 1.36 | 0.26 |      |      |      |      |  |
| [26] L1Lx_III    | 10.12 | 9.87  | 9.77  | 8.64  | 9.96  | 9.72  | 10.62 | 10.62 | 9.83  | 8.83  | 7.41  | 6.57 | 6.72 | 7.82  | 8.43  | 7.37  | 8.78  | 7.84  | 5.05 | 4.91 | 5.09 | 3.65 | 3.88 | 2.41 | 2.53 |      |      |      |  |
| [27] L1Lx_II     | 9.24  | 8.99  | 8.98  | 8.00  | 9.07  | 8.98  | 9.91  | 9.91  | 9.10  | 8.20  | 6.76  | 6.01 | 6.11 | 7.27  | 7.84  | 6.86  | 8.15  | 7.19  | 4.73 | 4.48 | 4.56 | 3.11 | 3.37 | 2.12 | 2.06 | 0.69 |      |      |  |
| [28] L1Lx_IV     | 12.04 | 11.79 | 11.70 | 10.72 | 11.98 | 11.70 | 12.60 | 12.60 | 11.75 | 10.96 | 9.72  | 8.84 | 9.04 | 10.01 | 10.57 | 9.73  | 10.81 | 10.01 | 7.39 | 7.06 | 7.44 | 5.84 | 6.26 | 4.63 | 4.69 | 0.98 | 1.87 |      |  |
| [29] L1MdV_III   | 12.60 | 12.45 | 12.31 | 11.47 | 12.54 | 12.35 | 13.16 | 13.16 | 12.47 | 11.67 | 10.04 | 9.16 | 9.30 | 10.53 | 10.83 | 10.10 | 11.63 | 10.57 | 7.61 | 7.66 | 7.71 | 6.20 | 6.47 | 4.86 | 4.87 | 2.47 | 2.76 | 3.22 |  |
